# Supplementary material for: TF-COMB – Discovering grammar of transcription factor binding sites
Source: PubMed Central journal article supplement — Comput Struct Biotechnol J. 2022 Jul 21;20:4040–51. doi: 10.1016/j.csbj.2022.07.025 (PMC9358416; doi:10.1016/j.csbj.2022.07.025), 2022-07-21
Supplement: mmc2.pdf [file mmc2.pdf]

**Supplementary Table 1:**  
An overview of ENCODE datasets used in this study

| File accession | File format    | Experiment target | Biosample term name | Biological replicate(s) | Assay                    |
|----------------|----------------|-------------------|---------------------|-------------------------|--------------------------|
| ENCFF607DTB    | bam            |                   | A549                |                         | 1 ATAC-seq               |
| ENCFF701BDT    | bam            |                   | A549                |                         | 2 ATAC-seq               |
| ENCFF616DYV    | bam            |                   | A549                |                         | 3 ATAC-seq               |
| ENCFF981FXV    | bam            |                   | GM12878             |                         | 1 ATAC-seq               |
| ENCFF962FMH    | bam            |                   | GM12878             |                         | 2 ATAC-seq               |
| ENCFF440GRZ    | bam            |                   | GM12878             |                         | 3 ATAC-seq               |
| ENCFF990VCP    | bam            |                   | HepG2               |                         | 1 ATAC-seq               |
| ENCFF624SON    | bam            |                   | HepG2               |                         | 2 ATAC-seq               |
| ENCFF926KFU    | bam            |                   | HepG2               |                         | 3 ATAC-seq               |
| ENCFF534DCE    | bam            |                   | K562                |                         | 1 ATAC-seq               |
| ENCFF128WZG    | bam            |                   | K562                |                         | 2 ATAC-seq               |
| ENCFF077FBI    | bam            |                   | K562                |                         | 3 ATAC-seq               |
| ENCFF607OSL    | bam            |                   | MCF-7               |                         | 1 ATAC-seq               |
| ENCFF772EFK    | bam            |                   | MCF-7               |                         | 2 ATAC-seq               |
| ENCFF678GBM    | bed narrowPeak |                   | K562                |                         | 1, 2, 3 ATAC-seq         |
| ENCFF915FZC    | bed narrowPeak |                   | HepG2               |                         | 1, 2, 3 ATAC-seq         |
| ENCFF871TST    | bed narrowPeak |                   | GM12878             |                         | 1, 2, 3 ATAC-seq         |
| ENCFF964AUZ    | bed narrowPeak |                   | A549                |                         | 1, 2, 3 ATAC-seq         |
| ENCFF291WTA    | bed narrowPeak |                   | MCF-7               |                         | 1, 2 ATAC-seq            |
| ENCFF918FET    | bed narrowPeak | H3K27ac           | A549                |                         | 1, 2, 3 Histone ChIP-seq |
| ENCFF594YDK    | bed narrowPeak | H3K4me1           | A549                |                         | 1, 2, 3 Histone ChIP-seq |
| ENCFF794FQH    | bed narrowPeak | H3K4me2           | A549                |                         | 1, 2, 3 Histone ChIP-seq |
| ENCFF535EYL    | bed narrowPeak | H3K4me3           | A549                |                         | 1, 2, 3 Histone ChIP-seq |
| ENCFF164FDB    | bed narrowPeak | H3K9me3           | A549                |                         | 1, 2, 3 Histone ChIP-seq |
| ENCFF377OJG    | bed narrowPeak | H2AFZ             | GM12878             |                         | 1, 2 Histone ChIP-seq    |
| ENCFF023LTU    | bed narrowPeak | H3K27ac           | GM12878             |                         | 1, 2 Histone ChIP-seq    |
| ENCFF695ETB    | bed narrowPeak | H3K27me3          | GM12878             |                         | 1, 2 Histone ChIP-seq    |
| ENCFF432EMI    | bed narrowPeak | H3K36me3          | GM12878             |                         | 1, 2 Histone ChIP-seq    |
| ENCFF321BVG    | bed narrowPeak | H3K4me1           | GM12878             |                         | 1, 2 Histone ChIP-seq    |
| ENCFF283LNH    | bed narrowPeak | H3K4me2           | GM12878             |                         | 1, 2 Histone ChIP-seq    |
| ENCFF587DVA    | bed narrowPeak | H3K4me3           | GM12878             |                         | 1, 2 Histone ChIP-seq    |
| ENCFF131ZGZ    | bed narrowPeak | H3K79me2          | GM12878             |                         | 1, 2 Histone ChIP-seq    |
| ENCFF069KAG    | bed narrowPeak | H3K9ac            | GM12878             |                         | 1, 2 Histone ChIP-seq    |
| ENCFF725UFY    | bed narrowPeak | H3K9me3           | GM12878             |                         | 1, 2, 3 Histone ChIP-seq |
| ENCFF469QYW    | bed narrowPeak | H4K20me1          | GM12878             |                         | 1, 2 Histone ChIP-seq    |
| ENCFF745GKP    | bed narrowPeak | H2AFZ             | H1                  |                         | 1, 2 Histone ChIP-seq    |
| ENCFF320JIP    | bed narrowPeak | H2AK5ac           | H1                  |                         | 1, 2 Histone ChIP-seq    |
| ENCFF808BIC    | bed narrowPeak | H2BK120ac         | H1                  |                         | 1, 2 Histone ChIP-seq    |
| ENCFF298VRY    | bed narrowPeak | H2BK120ac         | H1                  |                         | 1, 2 Histone ChIP-seq    |
| ENCFF237XZS    | bed narrowPeak | H2BK12ac          | H1                  |                         | 1, 2 Histone ChIP-seq    |
| ENCFF855ILJ    | bed narrowPeak | H2BK15ac          | H1                  |                         | 1, 2 Histone ChIP-seq    |
| ENCFF215EPH    | bed narrowPeak | H2BK20ac          | H1                  |                         | 1, 2 Histone ChIP-seq    |
| ENCFF929FTR    | bed narrowPeak | H2BK5ac           | H1                  |                         | 1, 2 Histone ChIP-seq    |
| ENCFF870OAL    | bed narrowPeak | H3K14ac           | H1                  |                         | 1, 2 Histone ChIP-seq    |
| ENCFF192GAX    | bed narrowPeak | H3K18ac           | H1                  |                         | 1, 2 Histone ChIP-seq    |
| ENCFF350XJF    | bed narrowPeak | H3K23ac           | H1                  |                         | 1, 2 Histone ChIP-seq    |

|             |                |          |         |      |                  |
|-------------|----------------|----------|---------|------|------------------|
| ENCFF567WXW | bed narrowPeak | H3K23me2 | H1      | 1, 2 | Histone ChIP-seq |
| ENCFF689CJG | bed narrowPeak | H3K27ac  | H1      | 1, 2 | Histone ChIP-seq |
| ENCFF254ACI | bed narrowPeak | H3K27me3 | H1      | 1, 2 | Histone ChIP-seq |
| ENCFF051UOL | bed narrowPeak | H3K36me3 | H1      | 1, 2 | Histone ChIP-seq |
| ENCFF711LQB | bed narrowPeak | H3K4ac   | H1      | 1, 2 | Histone ChIP-seq |
| ENCFF327EZJ | bed narrowPeak | H3K4ac   | H1      | 1, 2 | Histone ChIP-seq |
| ENCFF613QAB | bed narrowPeak | H3K4me1  | H1      | 1, 2 | Histone ChIP-seq |
| ENCFF583ABZ | bed narrowPeak | H3K4me2  | H1      | 1, 2 | Histone ChIP-seq |
| ENCFF041HYH | bed narrowPeak | H3K4me3  | H1      | 1, 2 | Histone ChIP-seq |
| ENCFF053HKF | bed narrowPeak | H3K56ac  | H1      | 1, 2 | Histone ChIP-seq |
| ENCFF472HMD | bed narrowPeak | H3K56ac  | H1      | 1, 2 | Histone ChIP-seq |
| ENCFF088PTH | bed narrowPeak | H3K79me1 | H1      | 1, 3 | Histone ChIP-seq |
| ENCFF620GIW | bed narrowPeak | H3K79me2 | H1      | 1, 2 | Histone ChIP-seq |
| ENCFF679LHF | bed narrowPeak | H3K9ac   | H1      | 1, 2 | Histone ChIP-seq |
| ENCFF678VNN | bed narrowPeak | H3K9me3  | H1      | 1, 3 | Histone ChIP-seq |
| ENCFF439CWL | bed narrowPeak | H4K20me1 | H1      | 1, 2 | Histone ChIP-seq |
| ENCFF295UVV | bed narrowPeak | H4K20me1 | H1      | 1, 2 | Histone ChIP-seq |
| ENCFF097DDN | bed narrowPeak | H4K5ac   | H1      | 1, 2 | Histone ChIP-seq |
| ENCFF760EFQ | bed narrowPeak | H4K8ac   | H1      | 1, 2 | Histone ChIP-seq |
| ENCFF910SNO | bed narrowPeak | H4K91ac  | H1      | 1, 2 | Histone ChIP-seq |
| ENCFF788KUH | bed narrowPeak | H4K91ac  | H1      | 1, 2 | Histone ChIP-seq |
| ENCFF225FPN | bed narrowPeak | H3K27ac  | HEK293  | 1, 2 | Histone ChIP-seq |
| ENCFF257ZFX | bed narrowPeak | H3K36me3 | HEK293  | 1, 2 | Histone ChIP-seq |
| ENCFF351MDO | bed narrowPeak | H3K4me1  | HEK293  | 1, 2 | Histone ChIP-seq |
| ENCFF617NUV | bed narrowPeak | H3K4me3  | HEK293  | 1, 2 | Histone ChIP-seq |
| ENCFF899MET | bed narrowPeak | H3K9me3  | HEK293  | 1, 2 | Histone ChIP-seq |
| ENCFF128TOM | bed narrowPeak | H2AFZ    | HeLa-S3 | 1, 2 | Histone ChIP-seq |
| ENCFF831XSS | bed narrowPeak | H3K27ac  | HeLa-S3 | 1, 2 | Histone ChIP-seq |
| ENCFF428MSN | bed narrowPeak | H3K27me3 | HeLa-S3 | 1, 2 | Histone ChIP-seq |
| ENCFF348FNV | bed narrowPeak | H3K36me3 | HeLa-S3 | 1, 2 | Histone ChIP-seq |
| ENCFF572NWJ | bed narrowPeak | H3K4me1  | HeLa-S3 | 1, 2 | Histone ChIP-seq |
| ENCFF429OQI | bed narrowPeak | H3K4me2  | HeLa-S3 | 1, 2 | Histone ChIP-seq |
| ENCFF932ZNX | bed narrowPeak | H3K4me3  | HeLa-S3 | 1, 2 | Histone ChIP-seq |
| ENCFF238XWI | bed narrowPeak | H3K79me2 | HeLa-S3 | 1, 2 | Histone ChIP-seq |
| ENCFF021PYM | bed narrowPeak | H3K9ac   | HeLa-S3 | 1, 2 | Histone ChIP-seq |
| ENCFF872YCK | bed narrowPeak | H3K9me3  | HeLa-S3 | 1, 2 | Histone ChIP-seq |
| ENCFF406DAM | bed narrowPeak | H4K20me1 | HeLa-S3 | 1, 2 | Histone ChIP-seq |
| ENCFF303VCJ | bed narrowPeak | H2AFZ    | HepG2   | 1    | Histone ChIP-seq |
| ENCFF749VEQ | bed narrowPeak | H3K27ac  | HepG2   | 1, 2 | Histone ChIP-seq |
| ENCFF053AZC | bed narrowPeak | H3K27me3 | HepG2   | 1, 2 | Histone ChIP-seq |
| ENCFF296VZN | bed narrowPeak | H3K36me3 | HepG2   | 1, 2 | Histone ChIP-seq |
| ENCFF413EGR | bed narrowPeak | H3K4me1  | HepG2   | 1, 2 | Histone ChIP-seq |
| ENCFF946FQI | bed narrowPeak | H3K4me2  | HepG2   | 1, 2 | Histone ChIP-seq |
| ENCFF982DUT | bed narrowPeak | H3K4me3  | HepG2   | 1, 2 | Histone ChIP-seq |
| ENCFF500KVU | bed narrowPeak | H3K79me2 | HepG2   | 1    | Histone ChIP-seq |
| ENCFF044QMC | bed narrowPeak | H3K9ac   | HepG2   | 1, 2 | Histone ChIP-seq |
| ENCFF372HCL | bed narrowPeak | H3K9me3  | HepG2   | 1, 2 | Histone ChIP-seq |
| ENCFF811ZMQ | bed narrowPeak | H4K20me1 | HepG2   | 1, 2 | Histone ChIP-seq |
| ENCFF213OTI | bed narrowPeak | H2AFZ    | K562    | 1, 2 | Histone ChIP-seq |
| ENCFF864OSZ | bed narrowPeak | H3K27ac  | K562    | 1, 2 | Histone ChIP-seq |
| ENCFF801AHF | bed narrowPeak | H3K27me3 | K562    | 1, 2 | Histone ChIP-seq |
| ENCFF561OUZ | bed narrowPeak | H3K36me3 | K562    | 1, 2 | Histone ChIP-seq |

|             |                |          |       |         |                  |
|-------------|----------------|----------|-------|---------|------------------|
| ENCFF759NWD | bed narrowPeak | H3K4me1  | K562  | 1, 2    | Histone ChIP-seq |
| ENCFF749KLQ | bed narrowPeak | H3K4me2  | K562  | 1, 2    | Histone ChIP-seq |
| ENCFF706WUF | bed narrowPeak | H3K4me3  | K562  | 1, 2    | Histone ChIP-seq |
| ENCFF945LQZ | bed narrowPeak | H3K79me2 | K562  | 1, 2    | Histone ChIP-seq |
| ENCFF148UQI | bed narrowPeak | H3K9ac   | K562  | 1, 2    | Histone ChIP-seq |
| ENCFF462AVD | bed narrowPeak | H3K9me1  | K562  | 1       | Histone ChIP-seq |
| ENCFF963GZJ | bed narrowPeak | H3K9me3  | K562  | 1, 2    | Histone ChIP-seq |
| ENCFF909RKY | bed narrowPeak | H4K20me1 | K562  | 1, 2    | Histone ChIP-seq |
| ENCFF378IVZ | bed narrowPeak | H2AFZ    | MCF-7 | 1, 2    | Histone ChIP-seq |
| ENCFF595UXF | bed narrowPeak | H3F3A    | MCF-7 | 1, 2    | Histone ChIP-seq |
| ENCFF491LQY | bed narrowPeak | H3K27ac  | MCF-7 | 1, 2    | Histone ChIP-seq |
| ENCFF669NUD | bed narrowPeak | H3K27me3 | MCF-7 | 1, 2    | Histone ChIP-seq |
| ENCFF739SBL | bed narrowPeak | H3K36me3 | MCF-7 | 1, 2    | Histone ChIP-seq |
| ENCFF991HJA | bed narrowPeak | H3K4me1  | MCF-7 | 1, 2    | Histone ChIP-seq |
| ENCFF188VRU | bed narrowPeak | H3K4me2  | MCF-7 | 1, 2    | Histone ChIP-seq |
| ENCFF268RXB | bed narrowPeak | H3K4me3  | MCF-7 | 1, 2    | Histone ChIP-seq |
| ENCFF660MSN | bed narrowPeak | H3K79me2 | MCF-7 | 1, 2    | Histone ChIP-seq |
| ENCFF348DEB | bed narrowPeak | H3K9ac   | MCF-7 | 1, 2    | Histone ChIP-seq |
| ENCFF538BHD | bed narrowPeak | H3K9me2  | MCF-7 | 1, 2    | Histone ChIP-seq |
| ENCFF501UHK | bed narrowPeak | H3K9me3  | MCF-7 | 1, 2    | Histone ChIP-seq |
| ENCFF714DEQ | bed narrowPeak | H4K20me1 | MCF-7 | 1, 2    | Histone ChIP-seq |
| ENCFF863QWG |                |          | HepG2 | 1       | RNA-seq          |
| ENCFF721BRA |                |          | MCF-7 | 1       | RNA-seq          |
| ENCFF520POQ | bed narrowPeak | ATOH8    | A549  | 1, 2    | TF ChIP-seq      |
| ENCFF008SZM | bed narrowPeak | BCL3     | A549  | 1, 2, 3 | TF ChIP-seq      |
| ENCFF808XJN | bed narrowPeak | BHLHE40  | A549  | 1, 2    | TF ChIP-seq      |
| ENCFF208AXT | bed narrowPeak | CBX2     | A549  | 1, 2    | TF ChIP-seq      |
| ENCFF330OCU | bed narrowPeak | CBX8     | A549  | 1, 2    | TF ChIP-seq      |
| ENCFF064WDQ | bed narrowPeak | CEBPB    | A549  | 1, 2    | TF ChIP-seq      |
| ENCFF757QNZ | bed narrowPeak | CHD2     | A549  | 1, 3    | TF ChIP-seq      |
| ENCFF766YPH | bed narrowPeak | CHD4     | A549  | 1, 2    | TF ChIP-seq      |
| ENCFF624ZSR | bed narrowPeak | CTCF     | A549  | 1, 2, 3 | TF ChIP-seq      |
| ENCFF786NAO | bed narrowPeak | E2F6     | A549  | 1, 2    | TF ChIP-seq      |
| ENCFF507RLU | bed narrowPeak | EHF      | A549  | 1, 2    | TF ChIP-seq      |
| ENCFF199OOU | bed narrowPeak | EHMT2    | A549  | 1, 2    | TF ChIP-seq      |
| ENCFF486IUH | bed narrowPeak | ELK1     | A549  | 1, 3    | TF ChIP-seq      |
| ENCFF143OQP | bed narrowPeak | EP300    | A549  | 1, 2, 3 | TF ChIP-seq      |
| ENCFF039TWK | bed narrowPeak | ESRRA    | A549  | 1, 2    | TF ChIP-seq      |
| ENCFF133ZSB | bed narrowPeak | FOSB     | A549  | 1, 2    | TF ChIP-seq      |
| ENCFF232TVP | bed narrowPeak | FOSL2    | A549  | 1, 2    | TF ChIP-seq      |
| ENCFF109ADF | bed narrowPeak | FOXF2    | A549  | 1, 2    | TF ChIP-seq      |
| ENCFF016TWL | bed narrowPeak | FOXS1    | A549  | 1, 2    | TF ChIP-seq      |
| ENCFF517TKD | bed narrowPeak | GATA3    | A549  | 1, 2    | TF ChIP-seq      |
| ENCFF814DAF | bed narrowPeak | HDAC2    | A549  | 1, 2    | TF ChIP-seq      |
| ENCFF209ZVL | bed narrowPeak | HES2     | A549  | 1, 2    | TF ChIP-seq      |
| ENCFF708HLM | bed narrowPeak | HMGXB4   | A549  | 1, 2    | TF ChIP-seq      |
| ENCFF670UIE | bed narrowPeak | HOXA7    | A549  | 1, 2    | TF ChIP-seq      |
| ENCFF641ZFM | bed narrowPeak | HOXB13   | A549  | 1, 2    | TF ChIP-seq      |
| ENCFF634TZG | bed narrowPeak | HOXB5    | A549  | 1, 2    | TF ChIP-seq      |
| ENCFF329CUQ | bed narrowPeak | JUN      | A549  | 1, 2, 3 | TF ChIP-seq      |
| ENCFF988QUL | bed narrowPeak | JUNB     | A549  | 2, 3    | TF ChIP-seq      |
| ENCFF316CBQ | bed narrowPeak | KDM1A    | A549  | 1, 2    | TF ChIP-seq      |

|             |                |                 |         |                     |
|-------------|----------------|-----------------|---------|---------------------|
| ENCFF702XIF | bed narrowPeak | KDM5A           | A549    | 1, 2 TF ChIP-seq    |
| ENCFF813WJW | bed narrowPeak | MAFK            | A549    | 2, 3 TF ChIP-seq    |
| ENCFF713RHL | bed narrowPeak | MAX             | A549    | 1, 2 TF ChIP-seq    |
| ENCFF661NNJ | bed narrowPeak | MAZ             | A549    | 2, 3 TF ChIP-seq    |
| ENCFF598BZD | bed narrowPeak | MYC             | A549    | 1, 2 TF ChIP-seq    |
| ENCFF418TUX | bed narrowPeak | NFE2L2          | A549    | 1, 2 TF ChIP-seq    |
| ENCFF404ASR | bed narrowPeak | NR2E3           | A549    | 1, 2 TF ChIP-seq    |
| ENCFF562UOF | bed narrowPeak | NR3C1           | A549    | 1, 2, 3 TF ChIP-seq |
| ENCFF507JZI | bed narrowPeak | NR5A2           | A549    | 1, 2 TF ChIP-seq    |
| ENCFF992LDJ | bed narrowPeak | PBX1            | A549    | 1, 2 TF ChIP-seq    |
| ENCFF656HFI | bed narrowPeak | PBX3            | A549    | 1, 2 TF ChIP-seq    |
| ENCFF307JCM | bed narrowPeak | PHF8            | A549    | 1, 2 TF ChIP-seq    |
| ENCFF681MRC | bed narrowPeak | POLR2A          | A549    | 1, 2 TF ChIP-seq    |
| ENCFF156MIR | bed narrowPeak | POLR2AphosphoS2 | A549    | 1, 2 TF ChIP-seq    |
| ENCFF719BHI | bed narrowPeak | PRDM1           | A549    | 1, 2 TF ChIP-seq    |
| ENCFF695MMQ | bed narrowPeak | RAD21           | A549    | 1, 2 TF ChIP-seq    |
| ENCFF871ZOH | bed narrowPeak | RARB            | A549    | 1, 2 TF ChIP-seq    |
| ENCFF993WZP | bed narrowPeak | RCOR1           | A549    | 1, 2 TF ChIP-seq    |
| ENCFF814JWH | bed narrowPeak | REST            | A549    | 1, 2 TF ChIP-seq    |
| ENCFF179WDI | bed narrowPeak | RFX5            | A549    | 2, 3 TF ChIP-seq    |
| ENCFF110EOX | bed narrowPeak | RNF2            | A549    | 1, 2 TF ChIP-seq    |
| ENCFF567BJI | bed narrowPeak | SIN3A           | A549    | 2, 3 TF ChIP-seq    |
| ENCFF146MNV | bed narrowPeak | SMC3            | A549    | 1, 2, 3 TF ChIP-seq |
| ENCFF624DDK | bed narrowPeak | SREBF1          | A549    | 2, 3 TF ChIP-seq    |
| ENCFF483YCC | bed narrowPeak | SREBF2          | A549    | 2, 3 TF ChIP-seq    |
| ENCFF766VUQ | bed narrowPeak | TEAD4           | A549    | 1, 2 TF ChIP-seq    |
| ENCFF679WUD | bed narrowPeak | TFCP2L1         | A549    | 1, 2 TF ChIP-seq    |
| ENCFF699UTZ | bed narrowPeak | TP53            | A549    | 1, 2 TF ChIP-seq    |
| ENCFF294QSH | bed narrowPeak | TP63            | A549    | 1, 2 TF ChIP-seq    |
| ENCFF593EOW | bed narrowPeak | USF2            | A549    | 2, 3 TF ChIP-seq    |
| ENCFF390AZA | bed narrowPeak | ZC3H11A         | A549    | 2, 3 TF ChIP-seq    |
| ENCFF137JHO | bed narrowPeak | ZFP36           | A549    | 2, 3 TF ChIP-seq    |
| ENCFF857LEC | bed narrowPeak | ZNF302          | A549    | 1, 2 TF ChIP-seq    |
| ENCFF439SWX | bed narrowPeak | ZNF624          | A549    | 1, 2 TF ChIP-seq    |
| ENCFF003VDB | bed narrowPeak | ARID3A          | GM12878 | 5, 6 TF ChIP-seq    |
| ENCFF758RQJ | bed narrowPeak | ARNT            | GM12878 | 2, 3 TF ChIP-seq    |
| ENCFF096XRG | bed narrowPeak | ASH2L           | GM12878 | 1, 2 TF ChIP-seq    |
| ENCFF806KKM | bed narrowPeak | ATF2            | GM12878 | 1, 2 TF ChIP-seq    |
| ENCFF882AEU | bed narrowPeak | ATF3            | GM12878 | 1, 2 TF ChIP-seq    |
| ENCFF495PWL | bed narrowPeak | ATF7            | GM12878 | 1, 2 TF ChIP-seq    |
| ENCFF725YZH | bed narrowPeak | BACH1           | GM12878 | 3, 4 TF ChIP-seq    |
| ENCFF832YIE | bed narrowPeak | BATF            | GM12878 | 1, 2 TF ChIP-seq    |
| ENCFF824QXX | bed narrowPeak | BCL11A          | GM12878 | 1, 2 TF ChIP-seq    |
| ENCFF452NTN | bed narrowPeak | BCL3            | GM12878 | 1, 2 TF ChIP-seq    |
| ENCFF587BJK | bed narrowPeak | BCLAF1          | GM12878 | 1, 2 TF ChIP-seq    |
| ENCFF633YUQ | bed narrowPeak | BHLHE40         | GM12878 | 1, 2 TF ChIP-seq    |
| ENCFF592LPO | bed narrowPeak | BMI1            | GM12878 | 1, 2 TF ChIP-seq    |
| ENCFF005JKU | bed narrowPeak | BRCA1           | GM12878 | 1, 2 TF ChIP-seq    |
| ENCFF070SOX | bed narrowPeak | CBFB            | GM12878 | 1, 2 TF ChIP-seq    |
| ENCFF552QOA | bed narrowPeak | CBX3            | GM12878 | 1, 2 TF ChIP-seq    |
| ENCFF864AYJ | bed narrowPeak | CBX5            | GM12878 | 1, 2 TF ChIP-seq    |
| ENCFF955YFB | bed narrowPeak | CEBPB           | GM12878 | 1, 2 TF ChIP-seq    |

|             |                |         |         |                     |
|-------------|----------------|---------|---------|---------------------|
| ENCFF243GOG | bed narrowPeak | CEBPZ   | GM12878 | 1, 3 TF ChIP-seq    |
| ENCFF863CTN | bed narrowPeak | CHD1    | GM12878 | 1, 2 TF ChIP-seq    |
| ENCFF351VXQ | bed narrowPeak | CHD2    | GM12878 | 1, 2 TF ChIP-seq    |
| ENCFF249SIN | bed narrowPeak | CHD4    | GM12878 | 1, 2 TF ChIP-seq    |
| ENCFF053UZX | bed narrowPeak | CREB1   | GM12878 | 1, 2 TF ChIP-seq    |
| ENCFF091YID | bed narrowPeak | CREM    | GM12878 | 1, 2 TF ChIP-seq    |
| ENCFF827JRI | bed narrowPeak | CTCF    | GM12878 | 1, 2, 3 TF ChIP-seq |
| ENCFF567NFS | bed narrowPeak | CUX1    | GM12878 | 1, 2 TF ChIP-seq    |
| ENCFF003ZLG | bed narrowPeak | DPF2    | GM12878 | 1, 2 TF ChIP-seq    |
| ENCFF687SFB | bed narrowPeak | E2F4    | GM12878 | 1, 2 TF ChIP-seq    |
| ENCFF412GFI | bed narrowPeak | E2F8    | GM12878 | 1, 2 TF ChIP-seq    |
| ENCFF035GFS | bed narrowPeak | E4F1    | GM12878 | 1, 2 TF ChIP-seq    |
| ENCFF895MHN | bed narrowPeak | EBF1    | GM12878 | 1, 2 TF ChIP-seq    |
| ENCFF023ALY | bed narrowPeak | EED     | GM12878 | 1, 2 TF ChIP-seq    |
| ENCFF637UJN | bed narrowPeak | EGR1    | GM12878 | 1, 2 TF ChIP-seq    |
| ENCFF146SYU | bed narrowPeak | ELF1    | GM12878 | 1, 2 TF ChIP-seq    |
| ENCFF432AQP | bed narrowPeak | ELK1    | GM12878 | 1, 2 TF ChIP-seq    |
| ENCFF718TWQ | bed narrowPeak | EP300   | GM12878 | 1, 2 TF ChIP-seq    |
| ENCFF722LJP | bed narrowPeak | ESRRA   | GM12878 | 1, 2 TF ChIP-seq    |
| ENCFF980VOD | bed narrowPeak | ETS1    | GM12878 | 1, 2 TF ChIP-seq    |
| ENCFF745ANU | bed narrowPeak | ETV6    | GM12878 | 1, 2 TF ChIP-seq    |
| ENCFF615NYO | bed narrowPeak | EZH2    | GM12878 | 1, 2 TF ChIP-seq    |
| ENCFF571DGT | bed narrowPeak | FOS     | GM12878 | 1, 2, 3 TF ChIP-seq |
| ENCFF990MTR | bed narrowPeak | FOXK2   | GM12878 | 1, 2 TF ChIP-seq    |
| ENCFF549GKZ | bed narrowPeak | FOXM1   | GM12878 | 1, 2 TF ChIP-seq    |
| ENCFF093KLR | bed narrowPeak | GABPA   | GM12878 | 1, 2 TF ChIP-seq    |
| ENCFF298AIX | bed narrowPeak | GATAD2B | GM12878 | 1, 2 TF ChIP-seq    |
| ENCFF722QBB | bed narrowPeak | HCFC1   | GM12878 | 1, 2 TF ChIP-seq    |
| ENCFF299UPZ | bed narrowPeak | HDAC2   | GM12878 | 1, 2 TF ChIP-seq    |
| ENCFF588SBL | bed narrowPeak | HDAC6   | GM12878 | 1 TF ChIP-seq       |
| ENCFF442WRJ | bed narrowPeak | HDGF    | GM12878 | 1, 2 TF ChIP-seq    |
| ENCFF603BID | bed narrowPeak | HSF1    | GM12878 | 1, 2 TF ChIP-seq    |
| ENCFF819VMH | bed narrowPeak | IKZF1   | GM12878 | 1, 2 TF ChIP-seq    |
| ENCFF511HZB | bed narrowPeak | IKZF2   | GM12878 | 1, 2 TF ChIP-seq    |
| ENCFF604AZX | bed narrowPeak | IRF3    | GM12878 | 1, 2 TF ChIP-seq    |
| ENCFF113VGD | bed narrowPeak | IRF4    | GM12878 | 1, 2 TF ChIP-seq    |
| ENCFF843HDK | bed narrowPeak | IRF5    | GM12878 | 1, 2 TF ChIP-seq    |
| ENCFF478XNA | bed narrowPeak | JUNB    | GM12878 | 1, 2 TF ChIP-seq    |
| ENCFF134BQO | bed narrowPeak | JUND    | GM12878 | 1, 2 TF ChIP-seq    |
| ENCFF710ROZ | bed narrowPeak | KAT2A   | GM12878 | 1, 2 TF ChIP-seq    |
| ENCFF996NUD | bed narrowPeak | KDM1A   | GM12878 | 1, 2 TF ChIP-seq    |
| ENCFF417WPC | bed narrowPeak | KLF5    | GM12878 | 1, 2 TF ChIP-seq    |
| ENCFF305SLO | bed narrowPeak | LARP7   | GM12878 | 1, 2 TF ChIP-seq    |
| ENCFF436SJS | bed narrowPeak | MAFK    | GM12878 | 1, 2 TF ChIP-seq    |
| ENCFF270NAL | bed narrowPeak | MAX     | GM12878 | 1, 2 TF ChIP-seq    |
| ENCFF348STZ | bed narrowPeak | MAZ     | GM12878 | 1, 2 TF ChIP-seq    |
| ENCFF826GQU | bed narrowPeak | MEF2A   | GM12878 | 1, 2 TF ChIP-seq    |
| ENCFF623FAW | bed narrowPeak | MEF2B   | GM12878 | 1, 2 TF ChIP-seq    |
| ENCFF830BRO | bed narrowPeak | MEF2C   | GM12878 | 1, 2 TF ChIP-seq    |
| ENCFF652GOE | bed narrowPeak | MLLT1   | GM12878 | 1, 2 TF ChIP-seq    |
| ENCFF587POH | bed narrowPeak | MTA2    | GM12878 | 1, 2 TF ChIP-seq    |
| ENCFF661FMB | bed narrowPeak | MTA3    | GM12878 | 1, 2 TF ChIP-seq    |

|             |                |                 |         |                                 |
|-------------|----------------|-----------------|---------|---------------------------------|
| ENCFF199HGX | bed narrowPeak | MXI1            | GM12878 | 1, 2 TF ChIP-seq                |
| ENCFF402TSJ | bed narrowPeak | MYB             | GM12878 | 1, 3 TF ChIP-seq                |
| ENCFF214XPD | bed narrowPeak | MYC             | GM12878 | 1, 2 TF ChIP-seq                |
| ENCFF811VEN | bed narrowPeak | NBN             | GM12878 | 1, 2 TF ChIP-seq                |
| ENCFF138ZBJ | bed narrowPeak | NFATC1          | GM12878 | 1, 2 TF ChIP-seq                |
| ENCFF002XEC | bed narrowPeak | NFATC3          | GM12878 | 1, 2 TF ChIP-seq                |
| ENCFF480WDX | bed narrowPeak | NFIC            | GM12878 | 1, 2 TF ChIP-seq                |
| ENCFF860IXB | bed narrowPeak | NFXL1           | GM12878 | 1, 2 TF ChIP-seq                |
| ENCFF278GJK | bed narrowPeak | NFYA            | GM12878 | 1, 2 TF ChIP-seq                |
| ENCFF156MUM | bed narrowPeak | NFYB            | GM12878 | 1, 2 TF ChIP-seq                |
| ENCFF084NXU | bed narrowPeak | NKRF            | GM12878 | 1, 2 TF ChIP-seq                |
| ENCFF462AKP | bed narrowPeak | NR2C1           | GM12878 | 1, 2 TF ChIP-seq                |
| ENCFF782KRV | bed narrowPeak | NR2C2           | GM12878 | 1, 2 TF ChIP-seq                |
| ENCFF531KOV | bed narrowPeak | NR2F1           | GM12878 | 1, 2 TF ChIP-seq                |
| ENCFF652BRY | bed narrowPeak | NRF1            | GM12878 | 1, 2 TF ChIP-seq                |
| ENCFF192WNJ | bed narrowPeak | PAX5            | GM12878 | 1, 2 TF ChIP-seq                |
| ENCFF992JWY | bed narrowPeak | PAX8            | GM12878 | 1, 2 TF ChIP-seq                |
| ENCFF402DQD | bed narrowPeak | PBX3            | GM12878 | 1, 2 TF ChIP-seq                |
| ENCFF335ADU | bed narrowPeak | PKNOX1          | GM12878 | 1, 2 TF ChIP-seq                |
| ENCFF242KVU | bed narrowPeak | PML             | GM12878 | 1, 2 TF ChIP-seq                |
| ENCFF886PSD | bed narrowPeak | POLR2A          | GM12878 | 1, 2, 3, 4, 5, 6, 7 TF ChIP-seq |
| ENCFF847DXY | bed narrowPeak | POLR2AphosphoS2 | GM12878 | 1, 2 TF ChIP-seq                |
| ENCFF107UMF | bed narrowPeak | POLR2AphosphoS5 | GM12878 | 1, 2 TF ChIP-seq                |
| ENCFF934JFA | bed narrowPeak | POU2F2          | GM12878 | 1, 2, 3 TF ChIP-seq             |
| ENCFF157HQD | bed narrowPeak | PRDM15          | GM12878 | 1, 2 TF ChIP-seq                |
| ENCFF940IMA | bed narrowPeak | RAD21           | GM12878 | 1, 2 TF ChIP-seq                |
| ENCFF996NBR | bed narrowPeak | RAD51           | GM12878 | 1, 2 TF ChIP-seq                |
| ENCFF034OSV | bed narrowPeak | RB1             | GM12878 | 3, 4 TF ChIP-seq                |
| ENCFF687SSY | bed narrowPeak | RBBP5           | GM12878 | 1, 2 TF ChIP-seq                |
| ENCFF470ZMK | bed narrowPeak | RCOR1           | GM12878 | 1, 2 TF ChIP-seq                |
| ENCFF105YDI | bed narrowPeak | RELB            | GM12878 | 1, 2 TF ChIP-seq                |
| ENCFF313CII | bed narrowPeak | REST            | GM12878 | 1, 2 TF ChIP-seq                |
| ENCFF259LNG | bed narrowPeak | RFX5            | GM12878 | 1, 2 TF ChIP-seq                |
| ENCFF346JDW | bed narrowPeak | RUNX3           | GM12878 | 1, 2 TF ChIP-seq                |
| ENCFF313BDA | bed narrowPeak | RXRA            | GM12878 | 1, 2 TF ChIP-seq                |
| ENCFF050CYK | bed narrowPeak | SIN3A           | GM12878 | 1, 2 TF ChIP-seq                |
| ENCFF878FBM | bed narrowPeak | SIX5            | GM12878 | 1, 2 TF ChIP-seq                |
| ENCFF903KEI | bed narrowPeak | SKIL            | GM12878 | 1, 2 TF ChIP-seq                |
| ENCFF987PGY | bed narrowPeak | SMAD1           | GM12878 | 1, 2 TF ChIP-seq                |
| ENCFF855SJG | bed narrowPeak | SMAD5           | GM12878 | 1, 2 TF ChIP-seq                |
| ENCFF550FDV | bed narrowPeak | SMARCA5         | GM12878 | 1, 2 TF ChIP-seq                |
| ENCFF837YJA | bed narrowPeak | SMC3            | GM12878 | 1, 2 TF ChIP-seq                |
| ENCFF038AVV | bed narrowPeak | SP1             | GM12878 | 2 TF ChIP-seq                   |
| ENCFF071ZMW | bed narrowPeak | SPI1            | GM12878 | 2, 3 TF ChIP-seq                |
| ENCFF397YRO | bed narrowPeak | SREBF1          | GM12878 | 1, 2 TF ChIP-seq                |
| ENCFF896MPE | bed narrowPeak | SREBF2          | GM12878 | 1, 2 TF ChIP-seq                |
| ENCFF114CWH | bed narrowPeak | SRF             | GM12878 | 1, 2 TF ChIP-seq                |
| ENCFF896SEI | bed narrowPeak | STAT1           | GM12878 | 1, 2 TF ChIP-seq                |
| ENCFF923CHO | bed narrowPeak | STAT3           | GM12878 | 1, 2 TF ChIP-seq                |
| ENCFF383YEA | bed narrowPeak | STAT5A          | GM12878 | 1, 2 TF ChIP-seq                |
| ENCFF069YVD | bed narrowPeak | SUPT20H         | GM12878 | 1, 2 TF ChIP-seq                |
| ENCFF894BBO | bed narrowPeak | SUZ12           | GM12878 | 1 TF ChIP-seq                   |

|             |                |         |         |                  |
|-------------|----------------|---------|---------|------------------|
| ENCFF540AAP | bed narrowPeak | TAF1    | GM12878 | 1, 2 TF ChIP-seq |
| ENCFF668JHK | bed narrowPeak | TARDBP  | GM12878 | 1, 2 TF ChIP-seq |
| ENCFF392JWA | bed narrowPeak | TBL1XR1 | GM12878 | 1, 2 TF ChIP-seq |
| ENCFF896UZB | bed narrowPeak | TBP     | GM12878 | 1, 2 TF ChIP-seq |
| ENCFF971VHK | bed narrowPeak | TBX21   | GM12878 | 1, 2 TF ChIP-seq |
| ENCFF768VSH | bed narrowPeak | TCF12   | GM12878 | 1, 2 TF ChIP-seq |
| ENCFF700TAS | bed narrowPeak | TCF3    | GM12878 | 1, 2 TF ChIP-seq |
| ENCFF152RNE | bed narrowPeak | TCF7    | GM12878 | 1, 2 TF ChIP-seq |
| ENCFF552WAH | bed narrowPeak | TRIM22  | GM12878 | 1, 2 TF ChIP-seq |
| ENCFF295ZLM | bed narrowPeak | UBTF    | GM12878 | 1, 2 TF ChIP-seq |
| ENCFF879TPT | bed narrowPeak | USF1    | GM12878 | 1, 2 TF ChIP-seq |
| ENCFF514SWA | bed narrowPeak | USF2    | GM12878 | 1, 2 TF ChIP-seq |
| ENCFF514DDI | bed narrowPeak | WRNIP1  | GM12878 | 1, 2 TF ChIP-seq |
| ENCFF500RBO | bed narrowPeak | YBX1    | GM12878 | 1, 2 TF ChIP-seq |
| ENCFF446ZSX | bed narrowPeak | YY1     | GM12878 | 1, 2 TF ChIP-seq |
| ENCFF630FLK | bed narrowPeak | ZBED1   | GM12878 | 1, 2 TF ChIP-seq |
| ENCFF475DID | bed narrowPeak | ZBTB33  | GM12878 | 1, 4 TF ChIP-seq |
| ENCFF084IUW | bed narrowPeak | ZBTB40  | GM12878 | 1, 2 TF ChIP-seq |
| ENCFF204LCG | bed narrowPeak | ZEB1    | GM12878 | 1, 2 TF ChIP-seq |
| ENCFF627JQX | bed narrowPeak | ZFP36   | GM12878 | 4, 5 TF ChIP-seq |
| ENCFF012FCL | bed narrowPeak | ZNF143  | GM12878 | 1, 2 TF ChIP-seq |
| ENCFF676BIG | bed narrowPeak | ZNF207  | GM12878 | 1, 2 TF ChIP-seq |
| ENCFF200SLC | bed narrowPeak | ZNF217  | GM12878 | 1, 2 TF ChIP-seq |
| ENCFF313HBL | bed narrowPeak | ZNF24   | GM12878 | 1, 2 TF ChIP-seq |
| ENCFF955FRU | bed narrowPeak | ZNF384  | GM12878 | 1, 2 TF ChIP-seq |
| ENCFF615DTQ | bed narrowPeak | ZNF592  | GM12878 | 1, 2 TF ChIP-seq |
| ENCFF777DVJ | bed narrowPeak | ZNF622  | GM12878 | 1, 3 TF ChIP-seq |
| ENCFF137BRA | bed narrowPeak | ZNF687  | GM12878 | 1, 2 TF ChIP-seq |
| ENCFF214NJL | bed narrowPeak | ZSCAN29 | GM12878 | 1, 2 TF ChIP-seq |
| ENCFF535WUH | bed narrowPeak | ZZZ3    | GM12878 | 1, 2 TF ChIP-seq |
| ENCFF693FGQ | bed narrowPeak | ASH2L   | H1      | 2 TF ChIP-seq    |
| ENCFF352KLD | bed narrowPeak | ATF2    | H1      | 1, 2 TF ChIP-seq |
| ENCFF487GLV | bed narrowPeak | ATF3    | H1      | 1, 2 TF ChIP-seq |
| ENCFF851YHG | bed narrowPeak | BACH1   | H1      | 1, 2 TF ChIP-seq |
| ENCFF847HXU | bed narrowPeak | BCL11A  | H1      | 1 TF ChIP-seq    |
| ENCFF721TNS | bed narrowPeak | BRCA1   | H1      | 1, 2 TF ChIP-seq |
| ENCFF218OXB | bed narrowPeak | CBX5    | H1      | 1, 2 TF ChIP-seq |
| ENCFF483UZG | bed narrowPeak | CBX8    | H1      | 1, 2 TF ChIP-seq |
| ENCFF823KCM | bed narrowPeak | CEBPB   | H1      | 1, 2 TF ChIP-seq |
| ENCFF962NKC | bed narrowPeak | CHD1    | H1      | 1, 2 TF ChIP-seq |
| ENCFF726GBF | bed narrowPeak | CHD2    | H1      | 1, 2 TF ChIP-seq |
| ENCFF338IDU | bed narrowPeak | CHD7    | H1      | 1, 2 TF ChIP-seq |
| ENCFF978KGB | bed narrowPeak | CREB1   | H1      | 1, 2 TF ChIP-seq |
| ENCFF482FLE | bed narrowPeak | CTBP2   | H1      | 1, 2 TF ChIP-seq |
| ENCFF023LAA | bed narrowPeak | CTCF    | H1      | 1, 2 TF ChIP-seq |
| ENCFF174AVU | bed narrowPeak | E2F6    | H1      | 1, 2 TF ChIP-seq |
| ENCFF477ANT | bed narrowPeak | EGR1    | H1      | 1, 2 TF ChIP-seq |
| ENCFF583FUX | bed narrowPeak | EP300   | H1      | 1 TF ChIP-seq    |
| ENCFF414CAB | bed narrowPeak | EZH2    | H1      | 1, 2 TF ChIP-seq |
| ENCFF428RHR | bed narrowPeak | FOSL1   | H1      | 1, 2 TF ChIP-seq |
| ENCFF225GFQ | bed narrowPeak | GABPA   | H1      | 1, 2 TF ChIP-seq |
| ENCFF493PRB | bed narrowPeak | GTF2F1  | H1      | 1, 2 TF ChIP-seq |

|             |                |                 |        |                  |
|-------------|----------------|-----------------|--------|------------------|
| ENCFF923TXH | bed narrowPeak | HDAC2           | H1     | 1, 2 TF ChIP-seq |
| ENCFF802HUU | bed narrowPeak | HDAC6           | H1     | 1 TF ChIP-seq    |
| ENCFF821GUI | bed narrowPeak | JUN             | H1     | 1, 2 TF ChIP-seq |
| ENCFF646IUA | bed narrowPeak | JUND            | H1     | 1, 2 TF ChIP-seq |
| ENCFF759CSN | bed narrowPeak | KDM1A           | H1     | 1, 2 TF ChIP-seq |
| ENCFF021QGZ | bed narrowPeak | KDM4A           | H1     | 1 TF ChIP-seq    |
| ENCFF342EEV | bed narrowPeak | KDM5A           | H1     | 1, 2 TF ChIP-seq |
| ENCFF710YJK | bed narrowPeak | MAFK            | H1     | 1, 2 TF ChIP-seq |
| ENCFF460LNS | bed narrowPeak | MAX             | H1     | 1, 2 TF ChIP-seq |
| ENCFF727RNJ | bed narrowPeak | MXI1            | H1     | 1, 2 TF ChIP-seq |
| ENCFF049SMR | bed narrowPeak | MYC             | H1     | 1 TF ChIP-seq    |
| ENCFF435DTC | bed narrowPeak | NANOG           | H1     | 1, 2 TF ChIP-seq |
| ENCFF414RES | bed narrowPeak | NRF1            | H1     | 1, 2 TF ChIP-seq |
| ENCFF651QOL | bed narrowPeak | PHF8            | H1     | 1, 2 TF ChIP-seq |
| ENCFF918UHB | bed narrowPeak | POLR2A          | H1     | 1 TF ChIP-seq    |
| ENCFF418QVJ | bed narrowPeak | POLR2AphosphoS5 | H1     | 1, 2 TF ChIP-seq |
| ENCFF383EYO | bed narrowPeak | POU5F1          | H1     | 1, 2 TF ChIP-seq |
| ENCFF883FUW | bed narrowPeak | RAD21           | H1     | 1, 2 TF ChIP-seq |
| ENCFF607WCG | bed narrowPeak | RBBP5           | H1     | 1, 2 TF ChIP-seq |
| ENCFF649VNE | bed narrowPeak | REST            | H1     | 1, 2 TF ChIP-seq |
| ENCFF062WBN | bed narrowPeak | RFX5            | H1     | 1, 2 TF ChIP-seq |
| ENCFF283MNG | bed narrowPeak | RNF2            | H1     | 1, 2 TF ChIP-seq |
| ENCFF745EBL | bed narrowPeak | RXRA            | H1     | 1, 2 TF ChIP-seq |
| ENCFF193TFR | bed narrowPeak | SAP30           | H1     | 1, 2 TF ChIP-seq |
| ENCFF432EYM | bed narrowPeak | SIN3A           | H1     | 1, 2 TF ChIP-seq |
| ENCFF219XEX | bed narrowPeak | SIRT6           | H1     | 1 TF ChIP-seq    |
| ENCFF384KWP | bed narrowPeak | SIX5            | H1     | 1, 2 TF ChIP-seq |
| ENCFF284JVS | bed narrowPeak | SP1             | H1     | 1, 2 TF ChIP-seq |
| ENCFF309QRC | bed narrowPeak | SP2             | H1     | 1, 2 TF ChIP-seq |
| ENCFF257FUV | bed narrowPeak | SP4             | H1     | 1, 2 TF ChIP-seq |
| ENCFF648QJE | bed narrowPeak | SRF             | H1     | 1, 2 TF ChIP-seq |
| ENCFF233GVJ | bed narrowPeak | SUZ12           | H1     | 1, 3 TF ChIP-seq |
| ENCFF870SFJ | bed narrowPeak | TAF1            | H1     | 1, 2 TF ChIP-seq |
| ENCFF243PSJ | bed narrowPeak | TAF7            | H1     | 1, 2 TF ChIP-seq |
| ENCFF748YXF | bed narrowPeak | TBP             | H1     | 1, 2 TF ChIP-seq |
| ENCFF959HJP | bed narrowPeak | TCF12           | H1     | 1, 2 TF ChIP-seq |
| ENCFF885PQR | bed narrowPeak | TEAD4           | H1     | 1, 2 TF ChIP-seq |
| ENCFF699HXL | bed narrowPeak | USF1            | H1     | 1, 2 TF ChIP-seq |
| ENCFF346KIW | bed narrowPeak | USF2            | H1     | 1, 2 TF ChIP-seq |
| ENCFF376FVJ | bed narrowPeak | YY1             | H1     | 1, 2 TF ChIP-seq |
| ENCFF235ROG | bed narrowPeak | ZNF143          | H1     | 1, 2 TF ChIP-seq |
| ENCFF718OGI | bed narrowPeak | ZNF274          | H1     | 1, 2 TF ChIP-seq |
| ENCFF913PSL | bed narrowPeak | AEBP2           | HEK293 | 1, 2 TF ChIP-seq |
| ENCFF225VCG | bed narrowPeak | ATF2            | HEK293 | 1, 2 TF ChIP-seq |
| ENCFF775QVY | bed narrowPeak | BCL11A          | HEK293 | 1, 2 TF ChIP-seq |
| ENCFF860DSJ | bed narrowPeak | BCL11B          | HEK293 | 1, 2 TF ChIP-seq |
| ENCFF165BAG | bed narrowPeak | BCL6B           | HEK293 | 1, 2 TF ChIP-seq |
| ENCFF071FSR | bed narrowPeak | CTCF            | HEK293 | 1, 2 TF ChIP-seq |
| ENCFF238OFT | bed narrowPeak | EGR2            | HEK293 | 1, 2 TF ChIP-seq |
| ENCFF226QHL | bed narrowPeak | ELK4            | HEK293 | 1, 2 TF ChIP-seq |
| ENCFF324ETS | bed narrowPeak | FEZF1           | HEK293 | 1, 2 TF ChIP-seq |
| ENCFF457HJS | bed narrowPeak | GFI1B           | HEK293 | 1, 2 TF ChIP-seq |



|             |                |        |        |                  |
|-------------|----------------|--------|--------|------------------|
| ENCFF617QGK | bed narrowPeak | GLI2   | HEK293 | 1, 2 TF ChIP-seq |
| ENCFF322YKQ | bed narrowPeak | GLI4   | HEK293 | 1, 2 TF ChIP-seq |
| ENCFF452YBB | bed narrowPeak | GLIS1  | HEK293 | 1, 2 TF ChIP-seq |
| ENCFF855XBY | bed narrowPeak | GLIS2  | HEK293 | 1, 2 TF ChIP-seq |
| ENCFF473AGH | bed narrowPeak | HIC1   | HEK293 | 1, 2 TF ChIP-seq |
| ENCFF999MOT | bed narrowPeak | IKZF3  | HEK293 | 2, 3 TF ChIP-seq |
| ENCFF929SUL | bed narrowPeak | INSM2  | HEK293 | 1, 2 TF ChIP-seq |
| ENCFF884RBR | bed narrowPeak | KLF1   | HEK293 | 1, 2 TF ChIP-seq |
| ENCFF753PHO | bed narrowPeak | KLF10  | HEK293 | 2, 3 TF ChIP-seq |
| ENCFF303TSY | bed narrowPeak | KLF16  | HEK293 | 1, 2 TF ChIP-seq |
| ENCFF661EXV | bed narrowPeak | KLF17  | HEK293 | 1, 2 TF ChIP-seq |
| ENCFF903AMR | bed narrowPeak | KLF7   | HEK293 | 1, 2 TF ChIP-seq |
| ENCFF399DXM | bed narrowPeak | KLF8   | HEK293 | 1, 2 TF ChIP-seq |
| ENCFF868TRF | bed narrowPeak | KLF9   | HEK293 | 1, 2 TF ChIP-seq |
| ENCFF529XTF | bed narrowPeak | MAZ    | HEK293 | 1, 2 TF ChIP-seq |
| ENCFF132UAB | bed narrowPeak | MYNN   | HEK293 | 1, 2 TF ChIP-seq |
| ENCFF347IBU | bed narrowPeak | MZF1   | HEK293 | 1, 2 TF ChIP-seq |
| ENCFF784QUI | bed narrowPeak | OSR2   | HEK293 | 1, 2 TF ChIP-seq |
| ENCFF293RRZ | bed narrowPeak | OVOL3  | HEK293 | 1, 2 TF ChIP-seq |
| ENCFF375JQI | bed narrowPeak | PATZ1  | HEK293 | 1, 2 TF ChIP-seq |
| ENCFF138HMJ | bed narrowPeak | PRDM1  | HEK293 | 1, 2 TF ChIP-seq |
| ENCFF680HBX | bed narrowPeak | PRDM10 | HEK293 | 1, 2 TF ChIP-seq |
| ENCFF395BHY | bed narrowPeak | PRDM2  | HEK293 | 1, 2 TF ChIP-seq |
| ENCFF756AYX | bed narrowPeak | PRDM4  | HEK293 | 2, 3 TF ChIP-seq |
| ENCFF540USW | bed narrowPeak | PRDM6  | HEK293 | 1, 2 TF ChIP-seq |
| ENCFF357ZHI | bed narrowPeak | RBAK   | HEK293 | 1, 2 TF ChIP-seq |
| ENCFF565NIW | bed narrowPeak | REPIN1 | HEK293 | 1, 3 TF ChIP-seq |
| ENCFF653SCL | bed narrowPeak | REST   | HEK293 | 1, 2 TF ChIP-seq |
| ENCFF076TXN | bed narrowPeak | SALL2  | HEK293 | 1, 2 TF ChIP-seq |
| ENCFF799CAL | bed narrowPeak | SCRT1  | HEK293 | 1, 2 TF ChIP-seq |
| ENCFF916ITG | bed narrowPeak | SCRT2  | HEK293 | 1, 2 TF ChIP-seq |
| ENCFF812YDP | bed narrowPeak | SETDB1 | HEK293 | 1 TF ChIP-seq    |
| ENCFF676YIL | bed narrowPeak | SP2    | HEK293 | 1, 2 TF ChIP-seq |
| ENCFF663PCO | bed narrowPeak | SP3    | HEK293 | 1, 2 TF ChIP-seq |
| ENCFF925KAK | bed narrowPeak | SP7    | HEK293 | 1, 2 TF ChIP-seq |
| ENCFF136SOA | bed narrowPeak | TCF7L2 | HEK293 | 1, 2 TF ChIP-seq |
| ENCFF211HPP | bed narrowPeak | TRIM28 | HEK293 | 1, 2 TF ChIP-seq |
| ENCFF691JUF | bed narrowPeak | TSHZ1  | HEK293 | 1, 2 TF ChIP-seq |
| ENCFF572OEF | bed narrowPeak | WT1    | HEK293 | 1, 2 TF ChIP-seq |
| ENCFF437JVZ | bed narrowPeak | YY1    | HEK293 | 1, 2 TF ChIP-seq |
| ENCFF814YLC | bed narrowPeak | YY2    | HEK293 | 1, 2 TF ChIP-seq |
| ENCFF765JWP | bed narrowPeak | ZBTB1  | HEK293 | 1, 2 TF ChIP-seq |
| ENCFF511BOQ | bed narrowPeak | ZBTB10 | HEK293 | 1, 2 TF ChIP-seq |
| ENCFF988PII | bed narrowPeak | ZBTB11 | HEK293 | 1, 2 TF ChIP-seq |
| ENCFF904ANO | bed narrowPeak | ZBTB12 | HEK293 | 1, 2 TF ChIP-seq |
| ENCFF299VRF | bed narrowPeak | ZBTB17 | HEK293 | 1, 2 TF ChIP-seq |
| ENCFF076WDH | bed narrowPeak | ZBTB20 | HEK293 | 1, 2 TF ChIP-seq |
| ENCFF313DUS | bed narrowPeak | ZBTB21 | HEK293 | 4, 5 TF ChIP-seq |
| ENCFF668ZRO | bed narrowPeak | ZBTB26 | HEK293 | 1, 2 TF ChIP-seq |
| ENCFF922WQN | bed narrowPeak | ZBTB44 | HEK293 | 2, 3 TF ChIP-seq |
| ENCFF233DCN | bed narrowPeak | ZBTB48 | HEK293 | 1, 2 TF ChIP-seq |
| ENCFF827YPG | bed narrowPeak | ZBTB49 | HEK293 | 1, 2 TF ChIP-seq |

|             |                |         |        |                  |
|-------------|----------------|---------|--------|------------------|
| ENCFF773KEL | bed narrowPeak | ZBTB6   | HEK293 | 1, 2 TF ChIP-seq |
| ENCFF928KRQ | bed narrowPeak | ZBTB7A  | HEK293 | 1, 2 TF ChIP-seq |
| ENCFF480WCB | bed narrowPeak | ZBTB8A  | HEK293 | 1, 2 TF ChIP-seq |
| ENCFF662TMD | bed narrowPeak | ZEB1    | HEK293 | 1, 2 TF ChIP-seq |
| ENCFF270KRH | bed narrowPeak | ZEB2    | HEK293 | 1, 2 TF ChIP-seq |
| ENCFF175UAG | bed narrowPeak | ZFHX2   | HEK293 | 1, 2 TF ChIP-seq |
| ENCFF348HKK | bed narrowPeak | ZFP3    | HEK293 | 1, 2 TF ChIP-seq |
| ENCFF668BSL | bed narrowPeak | ZFP37   | HEK293 | 1, 2 TF ChIP-seq |
| ENCFF720MYN | bed narrowPeak | ZFP41   | HEK293 | 1, 2 TF ChIP-seq |
| ENCFF963VBB | bed narrowPeak | ZFP69B  | HEK293 | 1, 2 TF ChIP-seq |
| ENCFF187CEY | bed narrowPeak | ZIC2    | HEK293 | 1, 2 TF ChIP-seq |
| ENCFF315FFJ | bed narrowPeak | ZNF10   | HEK293 | 1, 2 TF ChIP-seq |
| ENCFF831DRU | bed narrowPeak | ZNF112  | HEK293 | 1, 2 TF ChIP-seq |
| ENCFF728QYS | bed narrowPeak | ZNF114  | HEK293 | 2, 3 TF ChIP-seq |
| ENCFF496WZS | bed narrowPeak | ZNF121  | HEK293 | 1, 2 TF ChIP-seq |
| ENCFF526AOS | bed narrowPeak | ZNF132  | HEK293 | 1, 2 TF ChIP-seq |
| ENCFF113OWH | bed narrowPeak | ZNF133  | HEK293 | 1, 2 TF ChIP-seq |
| ENCFF334TBU | bed narrowPeak | ZNF138  | HEK293 | 1, 2 TF ChIP-seq |
| ENCFF285WQB | bed narrowPeak | ZNF140  | HEK293 | 1, 2 TF ChIP-seq |
| ENCFF825PWD | bed narrowPeak | ZNF146  | HEK293 | 1, 2 TF ChIP-seq |
| ENCFF960ZJT | bed narrowPeak | ZNF148  | HEK293 | 1, 2 TF ChIP-seq |
| ENCFF091JWQ | bed narrowPeak | ZNF155  | HEK293 | 1, 2 TF ChIP-seq |
| ENCFF498XCM | bed narrowPeak | ZNF157  | HEK293 | 1, 2 TF ChIP-seq |
| ENCFF978XMG | bed narrowPeak | ZNF16   | HEK293 | 1, 2 TF ChIP-seq |
| ENCFF236ZPP | bed narrowPeak | ZNF169  | HEK293 | 1, 2 TF ChIP-seq |
| ENCFF924JMH | bed narrowPeak | ZNF174  | HEK293 | 1, 2 TF ChIP-seq |
| ENCFF004JFD | bed narrowPeak | ZNF175  | HEK293 | 1, 2 TF ChIP-seq |
| ENCFF195OUI | bed narrowPeak | ZNF18   | HEK293 | 1, 2 TF ChIP-seq |
| ENCFF045FIY | bed narrowPeak | ZNF184  | HEK293 | 2, 3 TF ChIP-seq |
| ENCFF824YMX | bed narrowPeak | ZNF189  | HEK293 | 1, 2 TF ChIP-seq |
| ENCFF020TLE | bed narrowPeak | ZNF19   | HEK293 | 1, 2 TF ChIP-seq |
| ENCFF145USV | bed narrowPeak | ZNF2    | HEK293 | 1, 2 TF ChIP-seq |
| ENCFF107CPY | bed narrowPeak | ZNF202  | HEK293 | 1, 2 TF ChIP-seq |
| ENCFF407RMG | bed narrowPeak | ZNF211  | HEK293 | 1, 2 TF ChIP-seq |
| ENCFF786PVX | bed narrowPeak | ZNF214  | HEK293 | 1, 2 TF ChIP-seq |
| ENCFF219VBE | bed narrowPeak | ZNF221  | HEK293 | 1, 2 TF ChIP-seq |
| ENCFF863YLX | bed narrowPeak | ZNF223  | HEK293 | 1, 2 TF ChIP-seq |
| ENCFF655PMG | bed narrowPeak | ZNF23   | HEK293 | 1, 2 TF ChIP-seq |
| ENCFF901CWB | bed narrowPeak | ZNF239  | HEK293 | 1, 2 TF ChIP-seq |
| ENCFF216ALU | bed narrowPeak | ZNF24   | HEK293 | 1, 2 TF ChIP-seq |
| ENCFF982VOB | bed narrowPeak | ZNF248  | HEK293 | 1, 2 TF ChIP-seq |
| ENCFF665NYZ | bed narrowPeak | ZNF26   | HEK293 | 1, 2 TF ChIP-seq |
| ENCFF827SZZ | bed narrowPeak | ZNF263  | HEK293 | 1, 2 TF ChIP-seq |
| ENCFF053AVA | bed narrowPeak | ZNF266  | HEK293 | 1, 2 TF ChIP-seq |
| ENCFF428SMH | bed narrowPeak | ZNF274  | HEK293 | 1, 2 TF ChIP-seq |
| ENCFF120CMN | bed narrowPeak | ZNF280C | HEK293 | 1, 2 TF ChIP-seq |
| ENCFF085OEQ | bed narrowPeak | ZNF280D | HEK293 | 1, 2 TF ChIP-seq |
| ENCFF639RPS | bed narrowPeak | ZNF292  | HEK293 | 1, 2 TF ChIP-seq |
| ENCFF966YLG | bed narrowPeak | ZNF302  | HEK293 | 1, 2 TF ChIP-seq |
| ENCFF975JSZ | bed narrowPeak | ZNF311  | HEK293 | 1, 2 TF ChIP-seq |
| ENCFF902ZKV | bed narrowPeak | ZNF324  | HEK293 | 1, 2 TF ChIP-seq |
| ENCFF887JQV | bed narrowPeak | ZNF335  | HEK293 | 1, 2 TF ChIP-seq |

|             |                |         |        |                  |
|-------------|----------------|---------|--------|------------------|
| ENCFF123BYP | bed narrowPeak | ZNF34   | HEK293 | 1, 2 TF ChIP-seq |
| ENCFF482CYW | bed narrowPeak | ZNF341  | HEK293 | 1, 2 TF ChIP-seq |
| ENCFF032IPA | bed narrowPeak | ZNF350  | HEK293 | 1, 2 TF ChIP-seq |
| ENCFF036AEX | bed narrowPeak | ZNF354C | HEK293 | 1, 2 TF ChIP-seq |
| ENCFF409GGL | bed narrowPeak | ZNF362  | HEK293 | 1, 2 TF ChIP-seq |
| ENCFF738CQK | bed narrowPeak | ZNF366  | HEK293 | 1, 2 TF ChIP-seq |
| ENCFF328HFF | bed narrowPeak | ZNF37A  | HEK293 | 2, 3 TF ChIP-seq |
| ENCFF032CZR | bed narrowPeak | ZNF391  | HEK293 | 1, 2 TF ChIP-seq |
| ENCFF886YDF | bed narrowPeak | ZNF394  | HEK293 | 1, 2 TF ChIP-seq |
| ENCFF772OQU | bed narrowPeak | ZNF398  | HEK293 | 1, 2 TF ChIP-seq |
| ENCFF444CQQ | bed narrowPeak | ZNF404  | HEK293 | 1, 2 TF ChIP-seq |
| ENCFF126IZP | bed narrowPeak | ZNF416  | HEK293 | 1, 2 TF ChIP-seq |
| ENCFF311IXZ | bed narrowPeak | ZNF423  | HEK293 | 1, 2 TF ChIP-seq |
| ENCFF193XBL | bed narrowPeak | ZNF426  | HEK293 | 1, 2 TF ChIP-seq |
| ENCFF139XGF | bed narrowPeak | ZNF433  | HEK293 | 1, 2 TF ChIP-seq |
| ENCFF886WTI | bed narrowPeak | ZNF449  | HEK293 | 1, 2 TF ChIP-seq |
| ENCFF604AVO | bed narrowPeak | ZNF473  | HEK293 | 1, 2 TF ChIP-seq |
| ENCFF265LNU | bed narrowPeak | ZNF48   | HEK293 | 1, 2 TF ChIP-seq |
| ENCFF684WPJ | bed narrowPeak | ZNF488  | HEK293 | 1, 2 TF ChIP-seq |
| ENCFF090VNO | bed narrowPeak | ZNF501  | HEK293 | 1, 2 TF ChIP-seq |
| ENCFF193LIK | bed narrowPeak | ZNF510  | HEK293 | 1, 2 TF ChIP-seq |
| ENCFF970URF | bed narrowPeak | ZNF513  | HEK293 | 2, 3 TF ChIP-seq |
| ENCFF596KQL | bed narrowPeak | ZNF514  | HEK293 | 1, 2 TF ChIP-seq |
| ENCFF834NNK | bed narrowPeak | ZNF518A | HEK293 | 1, 2 TF ChIP-seq |
| ENCFF996QGV | bed narrowPeak | ZNF521  | HEK293 | 1, 2 TF ChIP-seq |
| ENCFF806WJB | bed narrowPeak | ZNF529  | HEK293 | 1, 2 TF ChIP-seq |
| ENCFF729VVD | bed narrowPeak | ZNF530  | HEK293 | 1, 2 TF ChIP-seq |
| ENCFF673JLB | bed narrowPeak | ZNF544  | HEK293 | 1, 2 TF ChIP-seq |
| ENCFF576BGV | bed narrowPeak | ZNF547  | HEK293 | 1, 2 TF ChIP-seq |
| ENCFF980EGS | bed narrowPeak | ZNF548  | HEK293 | 1, 2 TF ChIP-seq |
| ENCFF237SGW | bed narrowPeak | ZNF549  | HEK293 | 2, 3 TF ChIP-seq |
| ENCFF852JPW | bed narrowPeak | ZNF555  | HEK293 | 1, 2 TF ChIP-seq |
| ENCFF755FMU | bed narrowPeak | ZNF558  | HEK293 | 1, 2 TF ChIP-seq |
| ENCFF173MMO | bed narrowPeak | ZNF560  | HEK293 | 2, 3 TF ChIP-seq |
| ENCFF127PKO | bed narrowPeak | ZNF561  | HEK293 | 2, 3 TF ChIP-seq |
| ENCFF388XSN | bed narrowPeak | ZNF571  | HEK293 | 1, 2 TF ChIP-seq |
| ENCFF631BJV | bed narrowPeak | ZNF580  | HEK293 | 1, 2 TF ChIP-seq |
| ENCFF955EQI | bed narrowPeak | ZNF585B | HEK293 | 1, 2 TF ChIP-seq |
| ENCFF709SOO | bed narrowPeak | ZNF596  | HEK293 | 2, 3 TF ChIP-seq |
| ENCFF326MMO | bed narrowPeak | ZNF600  | HEK293 | 1, 2 TF ChIP-seq |
| ENCFF339XZT | bed narrowPeak | ZNF610  | HEK293 | 1, 2 TF ChIP-seq |
| ENCFF258PUP | bed narrowPeak | ZNF621  | HEK293 | 1, 2 TF ChIP-seq |
| ENCFF269NKC | bed narrowPeak | ZNF623  | HEK293 | 1, 2 TF ChIP-seq |
| ENCFF580LRK | bed narrowPeak | ZNF624  | HEK293 | 1, 2 TF ChIP-seq |
| ENCFF361TIN | bed narrowPeak | ZNF626  | HEK293 | 2, 3 TF ChIP-seq |
| ENCFF167ZZY | bed narrowPeak | ZNF629  | HEK293 | 2, 3 TF ChIP-seq |
| ENCFF747QYQ | bed narrowPeak | ZNF639  | HEK293 | 1, 2 TF ChIP-seq |
| ENCFF657RPA | bed narrowPeak | ZNF645  | HEK293 | 1, 2 TF ChIP-seq |
| ENCFF149OME | bed narrowPeak | ZNF654  | HEK293 | 1, 2 TF ChIP-seq |
| ENCFF894CGQ | bed narrowPeak | ZNF658  | HEK293 | 1, 2 TF ChIP-seq |
| ENCFF197LYS | bed narrowPeak | ZNF660  | HEK293 | 2, 3 TF ChIP-seq |
| ENCFF337BRJ | bed narrowPeak | ZNF664  | HEK293 | 1, 2 TF ChIP-seq |

|             |                |         |         |                  |
|-------------|----------------|---------|---------|------------------|
| ENCFF869NMB | bed narrowPeak | ZNF670  | HEK293  | 2, 3 TF ChIP-seq |
| ENCFF153JJQ | bed narrowPeak | ZNF677  | HEK293  | 2, 3 TF ChIP-seq |
| ENCFF359XJQ | bed narrowPeak | ZNF680  | HEK293  | 1, 2 TF ChIP-seq |
| ENCFF167MHN | bed narrowPeak | ZNF692  | HEK293  | 1, 2 TF ChIP-seq |
| ENCFF832OST | bed narrowPeak | ZNF701  | HEK293  | 1, 2 TF ChIP-seq |
| ENCFF137FMN | bed narrowPeak | ZNF704  | HEK293  | 1, 2 TF ChIP-seq |
| ENCFF735QIK | bed narrowPeak | ZNF707  | HEK293  | 1, 2 TF ChIP-seq |
| ENCFF029DNH | bed narrowPeak | ZNF747  | HEK293  | 1, 2 TF ChIP-seq |
| ENCFF170VVR | bed narrowPeak | ZNF76   | HEK293  | 1, 2 TF ChIP-seq |
| ENCFF713BAD | bed narrowPeak | ZNF768  | HEK293  | 1, 2 TF ChIP-seq |
| ENCFF554RDX | bed narrowPeak | ZNF770  | HEK293  | 1, 2 TF ChIP-seq |
| ENCFF836LWG | bed narrowPeak | ZNF776  | HEK293  | 1, 2 TF ChIP-seq |
| ENCFF804ZLF | bed narrowPeak | ZNF777  | HEK293  | 1, 2 TF ChIP-seq |
| ENCFF261IAG | bed narrowPeak | ZNF785  | HEK293  | 1, 2 TF ChIP-seq |
| ENCFF576BRL | bed narrowPeak | ZNF791  | HEK293  | 1, 2 TF ChIP-seq |
| ENCFF652HBV | bed narrowPeak | ZNF792  | HEK293  | 1, 2 TF ChIP-seq |
| ENCFF667JVF | bed narrowPeak | ZNF830  | HEK293  | 2, 3 TF ChIP-seq |
| ENCFF045YGV | bed narrowPeak | ZNF837  | HEK293  | 1, 2 TF ChIP-seq |
| ENCFF381VJM | bed narrowPeak | ZNF843  | HEK293  | 1, 2 TF ChIP-seq |
| ENCFF799OTE | bed narrowPeak | ZSCAN16 | HEK293  | 1, 2 TF ChIP-seq |
| ENCFF509YKU | bed narrowPeak | ZSCAN18 | HEK293  | 1, 2 TF ChIP-seq |
| ENCFF676QQC | bed narrowPeak | ZSCAN21 | HEK293  | 1, 2 TF ChIP-seq |
| ENCFF312JKD | bed narrowPeak | ZSCAN23 | HEK293  | 1, 2 TF ChIP-seq |
| ENCFF500ABD | bed narrowPeak | ZSCAN26 | HEK293  | 1, 2 TF ChIP-seq |
| ENCFF530LIW | bed narrowPeak | ZSCAN30 | HEK293  | 2, 3 TF ChIP-seq |
| ENCFF815ZYA | bed narrowPeak | ZSCAN4  | HEK293  | 1, 2 TF ChIP-seq |
| ENCFF280IWS | bed narrowPeak | ZSCAN5A | HEK293  | 1, 2 TF ChIP-seq |
| ENCFF679DYZ | bed narrowPeak | ZSCAN5C | HEK293  | 1, 2 TF ChIP-seq |
| ENCFF427HLT | bed narrowPeak | ZXDB    | HEK293  | 1, 2 TF ChIP-seq |
| ENCFF143SAQ | bed narrowPeak | BRCA1   | HeLa-S3 | 1, 2 TF ChIP-seq |
| ENCFF621LKI | bed narrowPeak | BRF1    | HeLa-S3 | 1, 2 TF ChIP-seq |
| ENCFF645KWQ | bed narrowPeak | BRF2    | HeLa-S3 | 1, 2 TF ChIP-seq |
| ENCFF014TJO | bed narrowPeak | CEBPB   | HeLa-S3 | 1, 2 TF ChIP-seq |
| ENCFF644XCT | bed narrowPeak | CHD2    | HeLa-S3 | 1, 2 TF ChIP-seq |
| ENCFF548ARU | bed narrowPeak | CTCF    | HeLa-S3 | 1, 2 TF ChIP-seq |
| ENCFF049NRL | bed narrowPeak | DEK     | HeLa-S3 | 1, 2 TF ChIP-seq |
| ENCFF872RSG | bed narrowPeak | E2F1    | HeLa-S3 | 1, 2 TF ChIP-seq |
| ENCFF718JTU | bed narrowPeak | E2F4    | HeLa-S3 | 1, 2 TF ChIP-seq |
| ENCFF160MCO | bed narrowPeak | E2F6    | HeLa-S3 | 1, 2 TF ChIP-seq |
| ENCFF279OML | bed narrowPeak | ELK1    | HeLa-S3 | 1, 2 TF ChIP-seq |
| ENCFF582BHA | bed narrowPeak | ELK4    | HeLa-S3 | 1, 2 TF ChIP-seq |
| ENCFF631WOD | bed narrowPeak | EP300   | HeLa-S3 | 1, 2 TF ChIP-seq |
| ENCFF568QUD | bed narrowPeak | EZH2    | HeLa-S3 | 1, 2 TF ChIP-seq |
| ENCFF494YNM | bed narrowPeak | FOS     | HeLa-S3 | 1, 2 TF ChIP-seq |
| ENCFF168BDU | bed narrowPeak | GABPA   | HeLa-S3 | 1, 2 TF ChIP-seq |
| ENCFF394JHN | bed narrowPeak | GTF2F1  | HeLa-S3 | 1, 2 TF ChIP-seq |
| ENCFF094AXB | bed narrowPeak | HCFC1   | HeLa-S3 | 1, 2 TF ChIP-seq |
| ENCFF291VFT | bed narrowPeak | IRF3    | HeLa-S3 | 1, 2 TF ChIP-seq |
| ENCFF806AQE | bed narrowPeak | JUN     | HeLa-S3 | 1, 2 TF ChIP-seq |
| ENCFF995QMN | bed narrowPeak | JUND    | HeLa-S3 | 1, 2 TF ChIP-seq |
| ENCFF013GAH | bed narrowPeak | KAT2A   | HeLa-S3 | 1, 2 TF ChIP-seq |
| ENCFF280WZN | bed narrowPeak | MAFF    | HeLa-S3 | 2, 3 TF ChIP-seq |

|             |                |                 |         |                     |
|-------------|----------------|-----------------|---------|---------------------|
| ENCFF328IZQ | bed narrowPeak | MAFK            | HeLa-S3 | 1, 2 TF ChIP-seq    |
| ENCFF666XCS | bed narrowPeak | MAX             | HeLa-S3 | 1, 2 TF ChIP-seq    |
| ENCFF424JHD | bed narrowPeak | MAZ             | HeLa-S3 | 1, 2 TF ChIP-seq    |
| ENCFF420AQP | bed narrowPeak | MXI1            | HeLa-S3 | 1, 2 TF ChIP-seq    |
| ENCFF515BTV | bed narrowPeak | MYC             | HeLa-S3 | 1, 2 TF ChIP-seq    |
| ENCFF664AZO | bed narrowPeak | NFE2L2          | HeLa-S3 | 1, 2 TF ChIP-seq    |
| ENCFF865QSV | bed narrowPeak | NFYA            | HeLa-S3 | 1, 2 TF ChIP-seq    |
| ENCFF191KVV | bed narrowPeak | NFYB            | HeLa-S3 | 1, 2 TF ChIP-seq    |
| ENCFF703LZR | bed narrowPeak | NR2C2           | HeLa-S3 | 1, 2 TF ChIP-seq    |
| ENCFF730BLH | bed narrowPeak | NRF1            | HeLa-S3 | 1, 2 TF ChIP-seq    |
| ENCFF245CAL | bed narrowPeak | POLR2A          | HeLa-S3 | 1, 2, 3 TF ChIP-seq |
| ENCFF867RKD | bed narrowPeak | POLR2AphosphoS2 | HeLa-S3 | 1, 2 TF ChIP-seq    |
| ENCFF767DMU | bed narrowPeak | POLR3A          | HeLa-S3 | 1, 2 TF ChIP-seq    |
| ENCFF721NYV | bed narrowPeak | PRDM1           | HeLa-S3 | 1, 2 TF ChIP-seq    |
| ENCFF239FBO | bed narrowPeak | RAD21           | HeLa-S3 | 1, 2 TF ChIP-seq    |
| ENCFF753CEB | bed narrowPeak | RCOR1           | HeLa-S3 | 1, 2 TF ChIP-seq    |
| ENCFF096JDA | bed narrowPeak | REST            | HeLa-S3 | 1, 2 TF ChIP-seq    |
| ENCFF438ZEN | bed narrowPeak | RFX5            | HeLa-S3 | 1, 2 TF ChIP-seq    |
| ENCFF216YDM | bed narrowPeak | SMARCA4         | HeLa-S3 | 1, 2, 3 TF ChIP-seq |
| ENCFF572FHR | bed narrowPeak | SMARCB1         | HeLa-S3 | 1, 2, 3 TF ChIP-seq |
| ENCFF492BST | bed narrowPeak | SMARCC1         | HeLa-S3 | 1, 2, 3 TF ChIP-seq |
| ENCFF253UAA | bed narrowPeak | SMARCC2         | HeLa-S3 | 1, 2, 3 TF ChIP-seq |
| ENCFF141KLW | bed narrowPeak | SMC3            | HeLa-S3 | 1, 2 TF ChIP-seq    |
| ENCFF785YII | bed narrowPeak | SREBF2          | HeLa-S3 | 2, 3 TF ChIP-seq    |
| ENCFF746VUX | bed narrowPeak | STAT3           | HeLa-S3 | 1, 2 TF ChIP-seq    |
| ENCFF044DFE | bed narrowPeak | SUPT20H         | HeLa-S3 | 1, 2 TF ChIP-seq    |
| ENCFF045BFG | bed narrowPeak | TAF1            | HeLa-S3 | 1, 2 TF ChIP-seq    |
| ENCFF363NQY | bed narrowPeak | TBP             | HeLa-S3 | 1, 2 TF ChIP-seq    |
| ENCFF936XIP | bed narrowPeak | TCF7L2          | HeLa-S3 | 1, 2 TF ChIP-seq    |
| ENCFF834LQR | bed narrowPeak | UBTF            | HeLa-S3 | 1, 2 TF ChIP-seq    |
| ENCFF405SDO | bed narrowPeak | USF2            | HeLa-S3 | 1, 2 TF ChIP-seq    |
| ENCFF346ZGY | bed narrowPeak | ZFP36           | HeLa-S3 | 1, 3 TF ChIP-seq    |
| ENCFF267DZF | bed narrowPeak | ZHX1            | HeLa-S3 | 1, 2 TF ChIP-seq    |
| ENCFF945JJR | bed narrowPeak | ZKSCAN1         | HeLa-S3 | 1, 2 TF ChIP-seq    |
| ENCFF236NLF | bed narrowPeak | ZNF143          | HeLa-S3 | 1, 2 TF ChIP-seq    |
| ENCFF546RIC | bed narrowPeak | ZNF274          | HeLa-S3 | 1, 2 TF ChIP-seq    |
| ENCFF675ARG | bed narrowPeak | ZZZ3            | HeLa-S3 | 1, 2 TF ChIP-seq    |
| ENCFF162UZN | bed narrowPeak | ADNP            | HepG2   | 1, 2 TF ChIP-seq    |
| ENCFF026PPP | bed narrowPeak | AFF4            | HepG2   | 1, 2 TF ChIP-seq    |
| ENCFF627BHP | bed narrowPeak | AGO1            | HepG2   | 1, 2 TF ChIP-seq    |
| ENCFF465FII | bed narrowPeak | AGO2            | HepG2   | 1, 2 TF ChIP-seq    |
| ENCFF048HNT | bed narrowPeak | AHDC1           | HepG2   | 1, 2 TF ChIP-seq    |
| ENCFF683QEX | bed narrowPeak | AHR             | HepG2   | 1, 2 TF ChIP-seq    |
| ENCFF716HAB | bed narrowPeak | AKAP8           | HepG2   | 1, 2 TF ChIP-seq    |
| ENCFF411GOS | bed narrowPeak | AKNA            | HepG2   | 1, 2 TF ChIP-seq    |
| ENCFF247GXE | bed narrowPeak | ARID3A          | HepG2   | 1, 2 TF ChIP-seq    |
| ENCFF258MNE | bed narrowPeak | ARID4A          | HepG2   | 1, 2 TF ChIP-seq    |
| ENCFF492BXK | bed narrowPeak | ARID4B          | HepG2   | 1, 2 TF ChIP-seq    |
| ENCFF477OUI | bed narrowPeak | ARID5B          | HepG2   | 1, 2 TF ChIP-seq    |
| ENCFF616WXJ | bed narrowPeak | ARNT            | HepG2   | 1, 2 TF ChIP-seq    |
| ENCFF588WBI | bed narrowPeak | ARNTL           | HepG2   | 1, 2 TF ChIP-seq    |
| ENCFF230OBH | bed narrowPeak | ASH2L           | HepG2   | 1, 2 TF ChIP-seq    |

|             |                |         |       |                  |
|-------------|----------------|---------|-------|------------------|
| ENCFF585SZT | bed narrowPeak | ATAD3A  | HepG2 | 1, 2 TF ChIP-seq |
| ENCFF683OFC | bed narrowPeak | ATF1    | HepG2 | 1, 2 TF ChIP-seq |
| ENCFF522LHU | bed narrowPeak | ATF2    | HepG2 | 1, 2 TF ChIP-seq |
| ENCFF349HIP | bed narrowPeak | ATF3    | HepG2 | 1, 2 TF ChIP-seq |
| ENCFF266GBP | bed narrowPeak | ATF4    | HepG2 | 1, 2 TF ChIP-seq |
| ENCFF482BEV | bed narrowPeak | ATF5    | HepG2 | 1, 2 TF ChIP-seq |
| ENCFF894YFW | bed narrowPeak | ATF7    | HepG2 | 1, 2 TF ChIP-seq |
| ENCFF906FVB | bed narrowPeak | ATM     | HepG2 | 1, 2 TF ChIP-seq |
| ENCFF998FLA | bed narrowPeak | ATRX    | HepG2 | 1, 2 TF ChIP-seq |
| ENCFF424FZS | bed narrowPeak | BCL3    | HepG2 | 1, 2 TF ChIP-seq |
| ENCFF014UTU | bed narrowPeak | BCL6    | HepG2 | 1, 2 TF ChIP-seq |
| ENCFF506PXL | bed narrowPeak | BCLAF1  | HepG2 | 1, 2 TF ChIP-seq |
| ENCFF992EBV | bed narrowPeak | BHLHE40 | HepG2 | 1, 2 TF ChIP-seq |
| ENCFF791SNR | bed narrowPeak | BRCA1   | HepG2 | 1, 2 TF ChIP-seq |
| ENCFF440ODC | bed narrowPeak | BRD4    | HepG2 | 1, 2 TF ChIP-seq |
| ENCFF333PIQ | bed narrowPeak | CAMTA2  | HepG2 | 1, 2 TF ChIP-seq |
| ENCFF951CCL | bed narrowPeak | CBFB    | HepG2 | 1, 2 TF ChIP-seq |
| ENCFF566PBY | bed narrowPeak | CBX1    | HepG2 | 1 TF ChIP-seq    |
| ENCFF501QII | bed narrowPeak | CBX2    | HepG2 | 1, 2 TF ChIP-seq |
| ENCFF486LNN | bed narrowPeak | CBX5    | HepG2 | 1, 2 TF ChIP-seq |
| ENCFF039LHY | bed narrowPeak | CCAR2   | HepG2 | 1, 2 TF ChIP-seq |
| ENCFF874PIO | bed narrowPeak | CEBPA   | HepG2 | 1, 2 TF ChIP-seq |
| ENCFF157DSR | bed narrowPeak | CEBPB   | HepG2 | 1, 2 TF ChIP-seq |
| ENCFF929XBL | bed narrowPeak | CEBPD   | HepG2 | 1, 2 TF ChIP-seq |
| ENCFF094SJQ | bed narrowPeak | CEBPG   | HepG2 | 1, 2 TF ChIP-seq |
| ENCFF195BKI | bed narrowPeak | CEBPZ   | HepG2 | 1, 2 TF ChIP-seq |
| ENCFF821HRB | bed narrowPeak | CENPX   | HepG2 | 1, 2 TF ChIP-seq |
| ENCFF209MHH | bed narrowPeak | CERS6   | HepG2 | 1, 2 TF ChIP-seq |
| ENCFF102ZOU | bed narrowPeak | CHD2    | HepG2 | 1, 2 TF ChIP-seq |
| ENCFF691DTG | bed narrowPeak | CHD4    | HepG2 | 1, 2 TF ChIP-seq |
| ENCFF955MFB | bed narrowPeak | CREB1   | HepG2 | 1, 2 TF ChIP-seq |
| ENCFF767ZRB | bed narrowPeak | CREB3   | HepG2 | 1, 2 TF ChIP-seq |
| ENCFF871PDU | bed narrowPeak | CREM    | HepG2 | 1, 2 TF ChIP-seq |
| ENCFF664UGR | bed narrowPeak | CTCF    | HepG2 | 1, 2 TF ChIP-seq |
| ENCFF544WSX | bed narrowPeak | DBP     | HepG2 | 1, 2 TF ChIP-seq |
| ENCFF659PQJ | bed narrowPeak | DDIT3   | HepG2 | 1, 2 TF ChIP-seq |
| ENCFF707SJC | bed narrowPeak | DLX6    | HepG2 | 1, 2 TF ChIP-seq |
| ENCFF092ZIZ | bed narrowPeak | DMAP1   | HepG2 | 1, 2 TF ChIP-seq |
| ENCFF598CBU | bed narrowPeak | DMTF1   | HepG2 | 1, 2 TF ChIP-seq |
| ENCFF622GUA | bed narrowPeak | DNMT1   | HepG2 | 1, 2 TF ChIP-seq |
| ENCFF186YGH | bed narrowPeak | DNMT3B  | HepG2 | 1, 2 TF ChIP-seq |
| ENCFF007COI | bed narrowPeak | DPF2    | HepG2 | 1, 2 TF ChIP-seq |
| ENCFF089DNE | bed narrowPeak | DR1     | HepG2 | 1, 2 TF ChIP-seq |
| ENCFF052EOE | bed narrowPeak | DRAP1   | HepG2 | 1, 2 TF ChIP-seq |
| ENCFF015STD | bed narrowPeak | DZIP1   | HepG2 | 1, 2 TF ChIP-seq |
| ENCFF049BWK | bed narrowPeak | E2F1    | HepG2 | 1, 2 TF ChIP-seq |
| ENCFF372PXU | bed narrowPeak | E2F2    | HepG2 | 1, 2 TF ChIP-seq |
| ENCFF245XOL | bed narrowPeak | E2F4    | HepG2 | 1, 2 TF ChIP-seq |
| ENCFF217STG | bed narrowPeak | EEA1    | HepG2 | 1, 2 TF ChIP-seq |
| ENCFF405LDS | bed narrowPeak | EED     | HepG2 | 1, 2 TF ChIP-seq |
| ENCFF603PUS | bed narrowPeak | EGR1    | HepG2 | 1, 2 TF ChIP-seq |
| ENCFF855VUF | bed narrowPeak | EHMT2   | HepG2 | 1, 2 TF ChIP-seq |

|             |                |         |       |                  |
|-------------|----------------|---------|-------|------------------|
| ENCFF215GPK | bed narrowPeak | ELF1    | HepG2 | 1, 2 TF ChIP-seq |
| ENCFF080FAU | bed narrowPeak | ELF3    | HepG2 | 1, 2 TF ChIP-seq |
| ENCFF488DML | bed narrowPeak | ELF4    | HepG2 | 1, 2 TF ChIP-seq |
| ENCFF399YOO | bed narrowPeak | ELK1    | HepG2 | 1, 2 TF ChIP-seq |
| ENCFF890ZHY | bed narrowPeak | ELK4    | HepG2 | 1, 2 TF ChIP-seq |
| ENCFF393LUP | bed narrowPeak | EP300   | HepG2 | 1, 2 TF ChIP-seq |
| ENCFF554LPO | bed narrowPeak | ERF     | HepG2 | 1, 2 TF ChIP-seq |
| ENCFF700DMQ | bed narrowPeak | ESRRA   | HepG2 | 1, 2 TF ChIP-seq |
| ENCFF191NVV | bed narrowPeak | ETS1    | HepG2 | 1, 2 TF ChIP-seq |
| ENCFF624RGO | bed narrowPeak | ETV4    | HepG2 | 1, 2 TF ChIP-seq |
| ENCFF712HHN | bed narrowPeak | ETV5    | HepG2 | 1, 2 TF ChIP-seq |
| ENCFF504QZJ | bed narrowPeak | EZH2    | HepG2 | 1, 2 TF ChIP-seq |
| ENCFF031LBW | bed narrowPeak | FIP1L1  | HepG2 | 1, 2 TF ChIP-seq |
| ENCFF497SIC | bed narrowPeak | FOSL1   | HepG2 | 1, 2 TF ChIP-seq |
| ENCFF772SCR | bed narrowPeak | FOSL2   | HepG2 | 1, 2 TF ChIP-seq |
| ENCFF466RZX | bed narrowPeak | FOXA1   | HepG2 | 1, 2 TF ChIP-seq |
| ENCFF759YCY | bed narrowPeak | FOXA2   | HepG2 | 1, 2 TF ChIP-seq |
| ENCFF251TUO | bed narrowPeak | FOXA3   | HepG2 | 1, 2 TF ChIP-seq |
| ENCFF548ZQR | bed narrowPeak | FOXJ3   | HepG2 | 1, 2 TF ChIP-seq |
| ENCFF605GXY | bed narrowPeak | FO XK1  | HepG2 | 1, 2 TF ChIP-seq |
| ENCFF315CHX | bed narrowPeak | FO XK2  | HepG2 | 1, 2 TF ChIP-seq |
| ENCFF567QWP | bed narrowPeak | FOXM1   | HepG2 | 1, 2 TF ChIP-seq |
| ENCFF331BSI | bed narrowPeak | FOXO1   | HepG2 | 1, 2 TF ChIP-seq |
| ENCFF460UOW | bed narrowPeak | FOXP1   | HepG2 | 1, 2 TF ChIP-seq |
| ENCFF163LGN | bed narrowPeak | FOXP4   | HepG2 | 1, 2 TF ChIP-seq |
| ENCFF139XIZ | bed narrowPeak | FUBP1   | HepG2 | 1, 2 TF ChIP-seq |
| ENCFF953FNE | bed narrowPeak | FUBP3   | HepG2 | 1, 2 TF ChIP-seq |
| ENCFF216YZI | bed narrowPeak | FUS     | HepG2 | 1, 2 TF ChIP-seq |
| ENCFF890WJZ | bed narrowPeak | GABPA   | HepG2 | 1, 2 TF ChIP-seq |
| ENCFF217XUD | bed narrowPeak | GABPB1  | HepG2 | 1, 2 TF ChIP-seq |
| ENCFF409YKQ | bed narrowPeak | GATA2   | HepG2 | 1, 2 TF ChIP-seq |
| ENCFF097OXR | bed narrowPeak | GATA4   | HepG2 | 1, 2 TF ChIP-seq |
| ENCFF928HFL | bed narrowPeak | GATAD1  | HepG2 | 1, 2 TF ChIP-seq |
| ENCFF158BJH | bed narrowPeak | GATAD2A | HepG2 | 1, 2 TF ChIP-seq |
| ENCFF999HNJ | bed narrowPeak | GFI1    | HepG2 | 1, 2 TF ChIP-seq |
| ENCFF802VTG | bed narrowPeak | GLI4    | HepG2 | 1, 2 TF ChIP-seq |
| ENCFF745JFN | bed narrowPeak | GLMP    | HepG2 | 1, 2 TF ChIP-seq |
| ENCFF004QJZ | bed narrowPeak | GMEB1   | HepG2 | 1, 2 TF ChIP-seq |
| ENCFF219KQD | bed narrowPeak | GMEB2   | HepG2 | 1, 2 TF ChIP-seq |
| ENCFF019SZJ | bed narrowPeak | GPBP1L1 | HepG2 | 1, 2 TF ChIP-seq |
| ENCFF955LND | bed narrowPeak | GPN1    | HepG2 | 1, 2 TF ChIP-seq |
| ENCFF599TWF | bed narrowPeak | GTF2F1  | HepG2 | 1, 2 TF ChIP-seq |
| ENCFF190LEQ | bed narrowPeak | GZF1    | HepG2 | 1, 2 TF ChIP-seq |
| ENCFF894AWT | bed narrowPeak | HBP1    | HepG2 | 1, 2 TF ChIP-seq |
| ENCFF485SRU | bed narrowPeak | HCFC1   | HepG2 | 1, 2 TF ChIP-seq |
| ENCFF705AOW | bed narrowPeak | HDAC1   | HepG2 | 1, 2 TF ChIP-seq |
| ENCFF221AOL | bed narrowPeak | HDAC2   | HepG2 | 1, 2 TF ChIP-seq |
| ENCFF109EXK | bed narrowPeak | HDAC6   | HepG2 | 1, 2 TF ChIP-seq |
| ENCFF714AQQ | bed narrowPeak | HES4    | HepG2 | 1, 2 TF ChIP-seq |
| ENCFF207CLF | bed narrowPeak | HHEX    | HepG2 | 1, 2 TF ChIP-seq |
| ENCFF445FCL | bed narrowPeak | HINFP   | HepG2 | 1, 2 TF ChIP-seq |
| ENCFF076ESL | bed narrowPeak | HIVEP1  | HepG2 | 1, 2 TF ChIP-seq |

|             |                |          |       |                  |
|-------------|----------------|----------|-------|------------------|
| ENCFF685UQE | bed narrowPeak | HLF      | HepG2 | 1, 2 TF ChIP-seq |
| ENCFF914TSO | bed narrowPeak | HMG20A   | HepG2 | 1, 2 TF ChIP-seq |
| ENCFF727GHV | bed narrowPeak | HMG20B   | HepG2 | 1, 2 TF ChIP-seq |
| ENCFF684UHQ | bed narrowPeak | HMGXB3   | HepG2 | 1, 2 TF ChIP-seq |
| ENCFF305WWR | bed narrowPeak | HMGXB4   | HepG2 | 1, 2 TF ChIP-seq |
| ENCFF767MSS | bed narrowPeak | HNF1A    | HepG2 | 1, 2 TF ChIP-seq |
| ENCFF022QCK | bed narrowPeak | HNF1B    | HepG2 | 1, 2 TF ChIP-seq |
| ENCFF704BPD | bed narrowPeak | HNF4A    | HepG2 | 1, 2 TF ChIP-seq |
| ENCFF123FQW | bed narrowPeak | HNF4G    | HepG2 | 1, 2 TF ChIP-seq |
| ENCFF046NUR | bed narrowPeak | HNRNPH1  | HepG2 | 1, 2 TF ChIP-seq |
| ENCFF035OPG | bed narrowPeak | HNRNPK   | HepG2 | 1, 2 TF ChIP-seq |
| ENCFF039CUI | bed narrowPeak | HNRNPL   | HepG2 | 1, 2 TF ChIP-seq |
| ENCFF890KTX | bed narrowPeak | HNRNPLL  | HepG2 | 1, 2 TF ChIP-seq |
| ENCFF509YFF | bed narrowPeak | HNRNPUL1 | HepG2 | 1, 2 TF ChIP-seq |
| ENCFF478OVU | bed narrowPeak | HOMEZ    | HepG2 | 1, 2 TF ChIP-seq |
| ENCFF753OCA | bed narrowPeak | HOXA3    | HepG2 | 1, 2 TF ChIP-seq |
| ENCFF385DPO | bed narrowPeak | HOXA5    | HepG2 | 1, 2 TF ChIP-seq |
| ENCFF647VJL | bed narrowPeak | HOXD1    | HepG2 | 1, 2 TF ChIP-seq |
| ENCFF062UNZ | bed narrowPeak | HSF2     | HepG2 | 1, 2 TF ChIP-seq |
| ENCFF969BZA | bed narrowPeak | IKZF1    | HepG2 | 1, 2 TF ChIP-seq |
| ENCFF948XVV | bed narrowPeak | IKZF4    | HepG2 | 1, 2 TF ChIP-seq |
| ENCFF371LUB | bed narrowPeak | IKZF5    | HepG2 | 1, 2 TF ChIP-seq |
| ENCFF368IYV | bed narrowPeak | IRF1     | HepG2 | 1, 2 TF ChIP-seq |
| ENCFF095ZXG | bed narrowPeak | IRF2     | HepG2 | 1, 2 TF ChIP-seq |
| ENCFF619GRL | bed narrowPeak | IRF3     | HepG2 | 1, 2 TF ChIP-seq |
| ENCFF827VMW | bed narrowPeak | IRF5     | HepG2 | 1, 2 TF ChIP-seq |
| ENCFF308RXD | bed narrowPeak | ISL2     | HepG2 | 1, 2 TF ChIP-seq |
| ENCFF674BRV | bed narrowPeak | JRK      | HepG2 | 1, 2 TF ChIP-seq |
| ENCFF079UOJ | bed narrowPeak | JUN      | HepG2 | 1, 2 TF ChIP-seq |
| ENCFF562YSV | bed narrowPeak | JUND     | HepG2 | 1, 2 TF ChIP-seq |
| ENCFF132RKR | bed narrowPeak | KAT2B    | HepG2 | 1, 2 TF ChIP-seq |
| ENCFF847BWZ | bed narrowPeak | KAT7     | HepG2 | 1, 2 TF ChIP-seq |
| ENCFF602VMT | bed narrowPeak | KAT8     | HepG2 | 1, 2 TF ChIP-seq |
| ENCFF439CGG | bed narrowPeak | KDM1A    | HepG2 | 1, 2 TF ChIP-seq |
| ENCFF902PJA | bed narrowPeak | KDM2A    | HepG2 | 1, 2 TF ChIP-seq |
| ENCFF729ZHC | bed narrowPeak | KDM3A    | HepG2 | 1, 2 TF ChIP-seq |
| ENCFF361JRX | bed narrowPeak | KDM4B    | HepG2 | 1, 2 TF ChIP-seq |
| ENCFF574LUU | bed narrowPeak | KDM5A    | HepG2 | 1, 2 TF ChIP-seq |
| ENCFF595TJC | bed narrowPeak | KDM5B    | HepG2 | 1, 2 TF ChIP-seq |
| ENCFF376CUV | bed narrowPeak | KDM6A    | HepG2 | 1, 2 TF ChIP-seq |
| ENCFF854ZPK | bed narrowPeak | KIAA2018 | HepG2 | 1, 2 TF ChIP-seq |
| ENCFF443QKY | bed narrowPeak | KLF11    | HepG2 | 1, 2 TF ChIP-seq |
| ENCFF124UUN | bed narrowPeak | KLF12    | HepG2 | 1, 2 TF ChIP-seq |
| ENCFF494FXL | bed narrowPeak | KLF13    | HepG2 | 1, 2 TF ChIP-seq |
| ENCFF257BGF | bed narrowPeak | KLF16    | HepG2 | 1, 2 TF ChIP-seq |
| ENCFF980OTF | bed narrowPeak | KLF6     | HepG2 | 1, 2 TF ChIP-seq |
| ENCFF529UJY | bed narrowPeak | KLF9     | HepG2 | 1, 2 TF ChIP-seq |
| ENCFF644EPI | bed narrowPeak | KMT2A    | HepG2 | 1, 2 TF ChIP-seq |
| ENCFF253EID | bed narrowPeak | KMT2B    | HepG2 | 1, 2 TF ChIP-seq |
| ENCFF918TGZ | bed narrowPeak | LBX2     | HepG2 | 1, 2 TF ChIP-seq |
| ENCFF453UVV | bed narrowPeak | LCOR     | HepG2 | 1, 2 TF ChIP-seq |
| ENCFF606UCO | bed narrowPeak | LCORL    | HepG2 | 1, 2 TF ChIP-seq |



|             |                |        |       |                     |
|-------------|----------------|--------|-------|---------------------|
| ENCFF976LBY | bed narrowPeak | MAF1   | HepG2 | 1, 2 TF ChIP-seq    |
| ENCFF005YUC | bed narrowPeak | MAFF   | HepG2 | 1, 2 TF ChIP-seq    |
| ENCFF944IDN | bed narrowPeak | MAFG   | HepG2 | 1, 2 TF ChIP-seq    |
| ENCFF654RRF | bed narrowPeak | MAFK   | HepG2 | 1, 2 TF ChIP-seq    |
| ENCFF241YGM | bed narrowPeak | MATR3  | HepG2 | 1, 2 TF ChIP-seq    |
| ENCFF254ZDA | bed narrowPeak | MAX    | HepG2 | 1, 2 TF ChIP-seq    |
| ENCFF341OLL | bed narrowPeak | MAZ    | HepG2 | 1, 2 TF ChIP-seq    |
| ENCFF960FKQ | bed narrowPeak | MBD1   | HepG2 | 1, 2 TF ChIP-seq    |
| ENCFF551CCD | bed narrowPeak | MBD4   | HepG2 | 1, 2 TF ChIP-seq    |
| ENCFF493UFO | bed narrowPeak | MED1   | HepG2 | 1, 2 TF ChIP-seq    |
| ENCFF003HBS | bed narrowPeak | MED13  | HepG2 | 1, 2 TF ChIP-seq    |
| ENCFF938PFW | bed narrowPeak | MEF2A  | HepG2 | 1, 2 TF ChIP-seq    |
| ENCFF407WPM | bed narrowPeak | MEF2D  | HepG2 | 1, 2 TF ChIP-seq    |
| ENCFF546OSE | bed narrowPeak | MEIS1  | HepG2 | 1, 2 TF ChIP-seq    |
| ENCFF647OBG | bed narrowPeak | MEIS2  | HepG2 | 1, 2 TF ChIP-seq    |
| ENCFF713BVZ | bed narrowPeak | MIER2  | HepG2 | 1, 2 TF ChIP-seq    |
| ENCFF186JAO | bed narrowPeak | MIER3  | HepG2 | 1, 2 TF ChIP-seq    |
| ENCFF963OLI | bed narrowPeak | MIXL1  | HepG2 | 1, 2 TF ChIP-seq    |
| ENCFF748SGP | bed narrowPeak | MLLT10 | HepG2 | 1, 2 TF ChIP-seq    |
| ENCFF232WMR | bed narrowPeak | MLX    | HepG2 | 1, 2 TF ChIP-seq    |
| ENCFF780JTP | bed narrowPeak | MLXIP  | HepG2 | 1, 2 TF ChIP-seq    |
| ENCFF562FMQ | bed narrowPeak | MNT    | HepG2 | 1, 2 TF ChIP-seq    |
| ENCFF958FYM | bed narrowPeak | MNX1   | HepG2 | 1, 2 TF ChIP-seq    |
| ENCFF381WCL | bed narrowPeak | MTA1   | HepG2 | 1, 2 TF ChIP-seq    |
| ENCFF093AZT | bed narrowPeak | MTA3   | HepG2 | 1, 2 TF ChIP-seq    |
| ENCFF502QZR | bed narrowPeak | MTF1   | HepG2 | 1, 2 TF ChIP-seq    |
| ENCFF620YHG | bed narrowPeak | MTF2   | HepG2 | 1, 2 TF ChIP-seq    |
| ENCFF835WKW | bed narrowPeak | MXD1   | HepG2 | 1, 2 TF ChIP-seq    |
| ENCFF985DMC | bed narrowPeak | MXD3   | HepG2 | 1, 2 TF ChIP-seq    |
| ENCFF160XKY | bed narrowPeak | MXD4   | HepG2 | 1, 2 TF ChIP-seq    |
| ENCFF599KZZ | bed narrowPeak | MXI1   | HepG2 | 1, 2, 3 TF ChIP-seq |
| ENCFF904DOZ | bed narrowPeak | MYBL2  | HepG2 | 1, 2 TF ChIP-seq    |
| ENCFF735PKA | bed narrowPeak | MYC    | HepG2 | 1, 2, 3 TF ChIP-seq |
| ENCFF048GXO | bed narrowPeak | MYNN   | HepG2 | 1, 2 TF ChIP-seq    |
| ENCFF158PPW | bed narrowPeak | MYRF   | HepG2 | 1, 2 TF ChIP-seq    |
| ENCFF287TUA | bed narrowPeak | NAIF1  | HepG2 | 1, 2 TF ChIP-seq    |
| ENCFF516UWH | bed narrowPeak | NBN    | HepG2 | 3, 4 TF ChIP-seq    |
| ENCFF399LOS | bed narrowPeak | NCOA1  | HepG2 | 1, 2 TF ChIP-seq    |
| ENCFF312YZB | bed narrowPeak | NCOA5  | HepG2 | 1, 2 TF ChIP-seq    |
| ENCFF878YXY | bed narrowPeak | NCOR1  | HepG2 | 1, 2 TF ChIP-seq    |
| ENCFF069YFV | bed narrowPeak | NFAT5  | HepG2 | 1, 2 TF ChIP-seq    |
| ENCFF482JEG | bed narrowPeak | NFATC3 | HepG2 | 1, 2 TF ChIP-seq    |
| ENCFF306ZFX | bed narrowPeak | NFE2   | HepG2 | 1, 2 TF ChIP-seq    |
| ENCFF620OUT | bed narrowPeak | NFE2L1 | HepG2 | 1, 2 TF ChIP-seq    |
| ENCFF130LVT | bed narrowPeak | NFE2L2 | HepG2 | 1, 2 TF ChIP-seq    |
| ENCFF926VIT | bed narrowPeak | NFIA   | HepG2 | 1, 2 TF ChIP-seq    |
| ENCFF127ZZG | bed narrowPeak | NFIB   | HepG2 | 1, 2 TF ChIP-seq    |
| ENCFF611FIV | bed narrowPeak | NFIC   | HepG2 | 1, 2 TF ChIP-seq    |
| ENCFF278ZNM | bed narrowPeak | NFIL3  | HepG2 | 1, 2 TF ChIP-seq    |
| ENCFF687TJX | bed narrowPeak | NFKB2  | HepG2 | 1, 2 TF ChIP-seq    |
| ENCFF505JMW | bed narrowPeak | NFKBIZ | HepG2 | 1, 2 TF ChIP-seq    |
| ENCFF162TPR | bed narrowPeak | NFRKB  | HepG2 | 3, 4 TF ChIP-seq    |

|             |                |                 |       |                     |
|-------------|----------------|-----------------|-------|---------------------|
| ENCFF166QJY | bed narrowPeak | NFYA            | HepG2 | 1, 2 TF ChIP-seq    |
| ENCFF257CCO | bed narrowPeak | NFYB            | HepG2 | 1, 2 TF ChIP-seq    |
| ENCFF124ITH | bed narrowPeak | NFYC            | HepG2 | 1, 2 TF ChIP-seq    |
| ENCFF435AEQ | bed narrowPeak | NKX3-1          | HepG2 | 1, 2 TF ChIP-seq    |
| ENCFF420QKI | bed narrowPeak | NONO            | HepG2 | 1, 2 TF ChIP-seq    |
| ENCFF996LQH | bed narrowPeak | NR0B2           | HepG2 | 1, 2 TF ChIP-seq    |
| ENCFF042QSE | bed narrowPeak | NR2C2           | HepG2 | 1, 2 TF ChIP-seq    |
| ENCFF852EYZ | bed narrowPeak | NR2F1           | HepG2 | 1, 2 TF ChIP-seq    |
| ENCFF804MKP | bed narrowPeak | NR2F2           | HepG2 | 1, 2 TF ChIP-seq    |
| ENCFF786BSA | bed narrowPeak | NR2F6           | HepG2 | 1, 2 TF ChIP-seq    |
| ENCFF514SEQ | bed narrowPeak | NR3C1           | HepG2 | 1, 2 TF ChIP-seq    |
| ENCFF510SAT | bed narrowPeak | NR5A1           | HepG2 | 1, 2 TF ChIP-seq    |
| ENCFF982PLG | bed narrowPeak | NRF1            | HepG2 | 1, 2 TF ChIP-seq    |
| ENCFF233BHX | bed narrowPeak | NRL             | HepG2 | 1, 2 TF ChIP-seq    |
| ENCFF919ZSN | bed narrowPeak | ONECUT1         | HepG2 | 1, 2 TF ChIP-seq    |
| ENCFF417HLM | bed narrowPeak | ONECUT2         | HepG2 | 1, 2 TF ChIP-seq    |
| ENCFF252CVY | bed narrowPeak | PAF1            | HepG2 | 1, 2 TF ChIP-seq    |
| ENCFF174JHS | bed narrowPeak | PATZ1           | HepG2 | 1, 2 TF ChIP-seq    |
| ENCFF165IYE | bed narrowPeak | PAWR            | HepG2 | 1, 2 TF ChIP-seq    |
| ENCFF700GPU | bed narrowPeak | PBX2            | HepG2 | 1, 2 TF ChIP-seq    |
| ENCFF487WAN | bed narrowPeak | PCBP1           | HepG2 | 1, 2 TF ChIP-seq    |
| ENCFF642XRH | bed narrowPeak | PCBP2           | HepG2 | 1, 2 TF ChIP-seq    |
| ENCFF882RPA | bed narrowPeak | PHB2            | HepG2 | 1, 2 TF ChIP-seq    |
| ENCFF635XBX | bed narrowPeak | PHF20           | HepG2 | 1, 2 TF ChIP-seq    |
| ENCFF682RGD | bed narrowPeak | PHF21A          | HepG2 | 1, 2 TF ChIP-seq    |
| ENCFF944XYP | bed narrowPeak | PHF5A           | HepG2 | 2 TF ChIP-seq       |
| ENCFF558WZE | bed narrowPeak | PHF8            | HepG2 | 1, 2 TF ChIP-seq    |
| ENCFF954EXR | bed narrowPeak | PITX1           | HepG2 | 1, 2 TF ChIP-seq    |
| ENCFF873OHG | bed narrowPeak | PLRG1           | HepG2 | 1, 2 TF ChIP-seq    |
| ENCFF991XSG | bed narrowPeak | PLSCR1          | HepG2 | 1, 2 TF ChIP-seq    |
| ENCFF175FFY | bed narrowPeak | POGZ            | HepG2 | 1, 2 TF ChIP-seq    |
| ENCFF043FHJ | bed narrowPeak | POLR2A          | HepG2 | 1, 2, 3 TF ChIP-seq |
| ENCFF652YVO | bed narrowPeak | POLR2AphosphoS2 | HepG2 | 1, 2 TF ChIP-seq    |
| ENCFF520SGM | bed narrowPeak | POLR2AphosphoS5 | HepG2 | 1, 2 TF ChIP-seq    |
| ENCFF551IJP | bed narrowPeak | POLR2G          | HepG2 | 1, 2 TF ChIP-seq    |
| ENCFF736PPV | bed narrowPeak | PPARG           | HepG2 | 1, 2 TF ChIP-seq    |
| ENCFF668GIP | bed narrowPeak | PRDM10          | HepG2 | 1, 2 TF ChIP-seq    |
| ENCFF486MHG | bed narrowPeak | PRDM15          | HepG2 | 1, 2 TF ChIP-seq    |
| ENCFF666ISN | bed narrowPeak | PRDM4           | HepG2 | 1, 2 TF ChIP-seq    |
| ENCFF249NCB | bed narrowPeak | PREB            | HepG2 | 1, 2 TF ChIP-seq    |
| ENCFF908QCS | bed narrowPeak | PRPF4           | HepG2 | 1, 2 TF ChIP-seq    |
| ENCFF875ZPV | bed narrowPeak | PTBP1           | HepG2 | 1, 2 TF ChIP-seq    |
| ENCFF052UCF | bed narrowPeak | RAD21           | HepG2 | 1, 2 TF ChIP-seq    |
| ENCFF859MBC | bed narrowPeak | RAD51           | HepG2 | 1, 2 TF ChIP-seq    |
| ENCFF458WPZ | bed narrowPeak | RARA            | HepG2 | 1, 2 TF ChIP-seq    |
| ENCFF909XQR | bed narrowPeak | RARG            | HepG2 | 1, 2 TF ChIP-seq    |
| ENCFF080TIX | bed narrowPeak | RBAK            | HepG2 | 1, 2 TF ChIP-seq    |
| ENCFF871YRG | bed narrowPeak | RBFOX2          | HepG2 | 1, 2 TF ChIP-seq    |
| ENCFF305WYD | bed narrowPeak | RBM22           | HepG2 | 1, 2 TF ChIP-seq    |
| ENCFF420ALF | bed narrowPeak | RBM39           | HepG2 | 1, 2 TF ChIP-seq    |
| ENCFF153ODZ | bed narrowPeak | RBPJ            | HepG2 | 1, 2 TF ChIP-seq    |
| ENCFF987VKU | bed narrowPeak | RCOR1           | HepG2 | 1, 2 TF ChIP-seq    |

|             |                |         |       |                  |
|-------------|----------------|---------|-------|------------------|
| ENCFF523CUM | bed narrowPeak | RCOR2   | HepG2 | 1, 2 TF ChIP-seq |
| ENCFF089XCL | bed narrowPeak | RELA    | HepG2 | 1, 2 TF ChIP-seq |
| ENCFF499ZBA | bed narrowPeak | RERE    | HepG2 | 1, 2 TF ChIP-seq |
| ENCFF669XCW | bed narrowPeak | REST    | HepG2 | 1, 2 TF ChIP-seq |
| ENCFF788CJF | bed narrowPeak | RFX1    | HepG2 | 2, 3 TF ChIP-seq |
| ENCFF431YWW | bed narrowPeak | RFX3    | HepG2 | 1, 2 TF ChIP-seq |
| ENCFF059GWW | bed narrowPeak | RFX5    | HepG2 | 1, 2 TF ChIP-seq |
| ENCFF125UKX | bed narrowPeak | RFXANK  | HepG2 | 1, 2 TF ChIP-seq |
| ENCFF322CXC | bed narrowPeak | RFXAP   | HepG2 | 1, 2 TF ChIP-seq |
| ENCFF380SYL | bed narrowPeak | RNF2    | HepG2 | 1, 3 TF ChIP-seq |
| ENCFF926UHP | bed narrowPeak | RNF219  | HepG2 | 1, 2 TF ChIP-seq |
| ENCFF044VTI | bed narrowPeak | RORA    | HepG2 | 1, 2 TF ChIP-seq |
| ENCFF625WYP | bed narrowPeak | RREB1   | HepG2 | 1, 2 TF ChIP-seq |
| ENCFF328SRN | bed narrowPeak | RXRA    | HepG2 | 1, 2 TF ChIP-seq |
| ENCFF499COS | bed narrowPeak | RXRB    | HepG2 | 1, 2 TF ChIP-seq |
| ENCFF710TSK | bed narrowPeak | SAFB2   | HepG2 | 1, 2 TF ChIP-seq |
| ENCFF182FNR | bed narrowPeak | SAP130  | HepG2 | 1, 2 TF ChIP-seq |
| ENCFF004LNV | bed narrowPeak | SATB2   | HepG2 | 1, 2 TF ChIP-seq |
| ENCFF782EKY | bed narrowPeak | SCMH1   | HepG2 | 1, 2 TF ChIP-seq |
| ENCFF615OJH | bed narrowPeak | SETDB1  | HepG2 | 1, 2 TF ChIP-seq |
| ENCFF779CUH | bed narrowPeak | SFPQ    | HepG2 | 1, 2 TF ChIP-seq |
| ENCFF635YMI | bed narrowPeak | SIN3A   | HepG2 | 1, 2 TF ChIP-seq |
| ENCFF193DQZ | bed narrowPeak | SIN3B   | HepG2 | 1, 2 TF ChIP-seq |
| ENCFF069QZX | bed narrowPeak | SIX1    | HepG2 | 1, 2 TF ChIP-seq |
| ENCFF643LFY | bed narrowPeak | SIX4    | HepG2 | 1, 2 TF ChIP-seq |
| ENCFF035ZFO | bed narrowPeak | SKI     | HepG2 | 2, 3 TF ChIP-seq |
| ENCFF243JXS | bed narrowPeak | SMAD1   | HepG2 | 1, 2 TF ChIP-seq |
| ENCFF206KPV | bed narrowPeak | SMAD3   | HepG2 | 1, 2 TF ChIP-seq |
| ENCFF541EKJ | bed narrowPeak | SMAD4   | HepG2 | 1, 2 TF ChIP-seq |
| ENCFF339ZPY | bed narrowPeak | SMAD9   | HepG2 | 1, 2 TF ChIP-seq |
| ENCFF150NHK | bed narrowPeak | SMARCC2 | HepG2 | 1, 2 TF ChIP-seq |
| ENCFF210HAA | bed narrowPeak | SMARCE1 | HepG2 | 1, 2 TF ChIP-seq |
| ENCFF035YWE | bed narrowPeak | SMC3    | HepG2 | 1, 2 TF ChIP-seq |
| ENCFF179LFO | bed narrowPeak | SNAI1   | HepG2 | 1, 2 TF ChIP-seq |
| ENCFF754CRG | bed narrowPeak | SNAPC4  | HepG2 | 1, 2 TF ChIP-seq |
| ENCFF455YMK | bed narrowPeak | SNRNP70 | HepG2 | 1, 2 TF ChIP-seq |
| ENCFF517EJH | bed narrowPeak | SOX13   | HepG2 | 1, 2 TF ChIP-seq |
| ENCFF338YFQ | bed narrowPeak | SOX18   | HepG2 | 1, 2 TF ChIP-seq |
| ENCFF703VBH | bed narrowPeak | SOX5    | HepG2 | 1, 2 TF ChIP-seq |
| ENCFF863JMY | bed narrowPeak | SOX6    | HepG2 | 1, 2 TF ChIP-seq |
| ENCFF333SWC | bed narrowPeak | SP1     | HepG2 | 1, 2 TF ChIP-seq |
| ENCFF342ETP | bed narrowPeak | SP110   | HepG2 | 1, 2 TF ChIP-seq |
| ENCFF467WXB | bed narrowPeak | SP140L  | HepG2 | 1, 2 TF ChIP-seq |
| ENCFF480YAW | bed narrowPeak | SP2     | HepG2 | 1, 2 TF ChIP-seq |
| ENCFF185BHD | bed narrowPeak | SP5     | HepG2 | 1, 2 TF ChIP-seq |
| ENCFF198OOM | bed narrowPeak | SPEN    | HepG2 | 1, 2 TF ChIP-seq |
| ENCFF050QMU | bed narrowPeak | SRF     | HepG2 | 1, 2 TF ChIP-seq |
| ENCFF131DDP | bed narrowPeak | SRSF1   | HepG2 | 1, 2 TF ChIP-seq |
| ENCFF122FVR | bed narrowPeak | SRSF4   | HepG2 | 1, 2 TF ChIP-seq |
| ENCFF851DRP | bed narrowPeak | SRSF9   | HepG2 | 1, 2 TF ChIP-seq |
| ENCFF046ODH | bed narrowPeak | SSRP1   | HepG2 | 1, 2 TF ChIP-seq |
| ENCFF477JRZ | bed narrowPeak | STAG1   | HepG2 | 1, 2 TF ChIP-seq |

|             |                |         |       |                  |
|-------------|----------------|---------|-------|------------------|
| ENCFF370XOM | bed narrowPeak | STAT5B  | HepG2 | 1, 2 TF ChIP-seq |
| ENCFF861MUF | bed narrowPeak | STAT6   | HepG2 | 1, 2 TF ChIP-seq |
| ENCFF239LRW | bed narrowPeak | SUZ12   | HepG2 | 1, 2 TF ChIP-seq |
| ENCFF157IIV | bed narrowPeak | SYNCRIP | HepG2 | 1, 2 TF ChIP-seq |
| ENCFF006LKS | bed narrowPeak | TAF1    | HepG2 | 1, 2 TF ChIP-seq |
| ENCFF718RXL | bed narrowPeak | TAF15   | HepG2 | 1, 2 TF ChIP-seq |
| ENCFF696QPP | bed narrowPeak | TARDBP  | HepG2 | 1, 2 TF ChIP-seq |
| ENCFF126KGW | bed narrowPeak | TBL1XR1 | HepG2 | 1, 2 TF ChIP-seq |
| ENCFF198GZQ | bed narrowPeak | TBP     | HepG2 | 1, 2 TF ChIP-seq |
| ENCFF946LHJ | bed narrowPeak | TBX2    | HepG2 | 1, 2 TF ChIP-seq |
| ENCFF887DUY | bed narrowPeak | TBX3    | HepG2 | 1, 2 TF ChIP-seq |
| ENCFF299JYV | bed narrowPeak | TCF12   | HepG2 | 1, 2 TF ChIP-seq |
| ENCFF902EKZ | bed narrowPeak | TCF3    | HepG2 | 1, 2 TF ChIP-seq |
| ENCFF715QJD | bed narrowPeak | TCF7    | HepG2 | 1, 2 TF ChIP-seq |
| ENCFF726SWQ | bed narrowPeak | TCF7L2  | HepG2 | 1, 2 TF ChIP-seq |
| ENCFF460HAG | bed narrowPeak | TEAD1   | HepG2 | 1, 2 TF ChIP-seq |
| ENCFF680JFD | bed narrowPeak | TEAD2   | HepG2 | 1, 2 TF ChIP-seq |
| ENCFF314CDT | bed narrowPeak | TEAD3   | HepG2 | 1, 2 TF ChIP-seq |
| ENCFF355HRT | bed narrowPeak | TEAD4   | HepG2 | 1, 2 TF ChIP-seq |
| ENCFF475HLY | bed narrowPeak | TEF     | HepG2 | 1, 2 TF ChIP-seq |
| ENCFF645QRU | bed narrowPeak | TFAP4   | HepG2 | 1, 2 TF ChIP-seq |
| ENCFF245GRN | bed narrowPeak | TFDP1   | HepG2 | 1, 2 TF ChIP-seq |
| ENCFF340VOQ | bed narrowPeak | TFDP2   | HepG2 | 1, 2 TF ChIP-seq |
| ENCFF277NOY | bed narrowPeak | TFE3    | HepG2 | 1, 2 TF ChIP-seq |
| ENCFF661WFA | bed narrowPeak | TGIF2   | HepG2 | 1, 2 TF ChIP-seq |
| ENCFF889SYG | bed narrowPeak | THAP11  | HepG2 | 1, 2 TF ChIP-seq |
| ENCFF723WCO | bed narrowPeak | THAP8   | HepG2 | 1, 2 TF ChIP-seq |
| ENCFF858SAF | bed narrowPeak | THAP9   | HepG2 | 1, 2 TF ChIP-seq |
| ENCFF737MXG | bed narrowPeak | THRA    | HepG2 | 1, 2 TF ChIP-seq |
| ENCFF671MXD | bed narrowPeak | THRB    | HepG2 | 1, 2 TF ChIP-seq |
| ENCFF003AMQ | bed narrowPeak | TIGD3   | HepG2 | 1, 2 TF ChIP-seq |
| ENCFF667FDX | bed narrowPeak | TIGD6   | HepG2 | 1, 2 TF ChIP-seq |
| ENCFF167IAP | bed narrowPeak | TOE1    | HepG2 | 1, 2 TF ChIP-seq |
| ENCFF503IOR | bed narrowPeak | TRAFD1  | HepG2 | 1, 2 TF ChIP-seq |
| ENCFF063GDN | bed narrowPeak | TRIM22  | HepG2 | 1, 2 TF ChIP-seq |
| ENCFF278CIM | bed narrowPeak | TSC22D2 | HepG2 | 1, 2 TF ChIP-seq |
| ENCFF034KUO | bed narrowPeak | U2AF1   | HepG2 | 1, 2 TF ChIP-seq |
| ENCFF556EWI | bed narrowPeak | U2AF2   | HepG2 | 1, 2 TF ChIP-seq |
| ENCFF810LSF | bed narrowPeak | UBTF    | HepG2 | 1, 2 TF ChIP-seq |
| ENCFF442JPI | bed narrowPeak | USF1    | HepG2 | 1, 2 TF ChIP-seq |
| ENCFF458AZS | bed narrowPeak | USF2    | HepG2 | 1, 2 TF ChIP-seq |
| ENCFF985SRX | bed narrowPeak | WIZ     | HepG2 | 1, 2 TF ChIP-seq |
| ENCFF472DLA | bed narrowPeak | XBP1    | HepG2 | 1, 2 TF ChIP-seq |
| ENCFF790ZAQ | bed narrowPeak | XRCC5   | HepG2 | 1, 2 TF ChIP-seq |
| ENCFF332FUE | bed narrowPeak | YBX1    | HepG2 | 1, 2 TF ChIP-seq |
| ENCFF481VPQ | bed narrowPeak | YEATS2  | HepG2 | 1, 2 TF ChIP-seq |
| ENCFF931JDS | bed narrowPeak | YEATS4  | HepG2 | 1, 2 TF ChIP-seq |
| ENCFF177YDT | bed narrowPeak | YY1     | HepG2 | 1, 2 TF ChIP-seq |
| ENCFF021YBN | bed narrowPeak | ZBED4   | HepG2 | 1, 2 TF ChIP-seq |
| ENCFF160DNR | bed narrowPeak | ZBED5   | HepG2 | 1, 2 TF ChIP-seq |
| ENCFF643FQU | bed narrowPeak | ZBTB1   | HepG2 | 1, 2 TF ChIP-seq |
| ENCFF825GVH | bed narrowPeak | ZBTB10  | HepG2 | 1, 2 TF ChIP-seq |

|             |                |         |       |                  |
|-------------|----------------|---------|-------|------------------|
| ENCFF428ZPS | bed narrowPeak | ZBTB14  | HepG2 | 1, 2 TF ChIP-seq |
| ENCFF819NNH | bed narrowPeak | ZBTB21  | HepG2 | 1, 2 TF ChIP-seq |
| ENCFF148RPN | bed narrowPeak | ZBTB24  | HepG2 | 1, 2 TF ChIP-seq |
| ENCFF330FGQ | bed narrowPeak | ZBTB25  | HepG2 | 1, 2 TF ChIP-seq |
| ENCFF053GKA | bed narrowPeak | ZBTB26  | HepG2 | 1, 2 TF ChIP-seq |
| ENCFF149QHA | bed narrowPeak | ZBTB3   | HepG2 | 1, 2 TF ChIP-seq |
| ENCFF260XMT | bed narrowPeak | ZBTB33  | HepG2 | 1, 2 TF ChIP-seq |
| ENCFF180WMP | bed narrowPeak | ZBTB37  | HepG2 | 1, 2 TF ChIP-seq |
| ENCFF349OOT | bed narrowPeak | ZBTB38  | HepG2 | 1, 2 TF ChIP-seq |
| ENCFF482QHM | bed narrowPeak | ZBTB39  | HepG2 | 1, 2 TF ChIP-seq |
| ENCFF374HXP | bed narrowPeak | ZBTB4   | HepG2 | 1, 2 TF ChIP-seq |
| ENCFF624WDI | bed narrowPeak | ZBTB40  | HepG2 | 1, 2 TF ChIP-seq |
| ENCFF696QTC | bed narrowPeak | ZBTB42  | HepG2 | 1, 2 TF ChIP-seq |
| ENCFF458IBK | bed narrowPeak | ZBTB44  | HepG2 | 1, 2 TF ChIP-seq |
| ENCFF930FAL | bed narrowPeak | ZBTB46  | HepG2 | 1, 2 TF ChIP-seq |
| ENCFF906SCU | bed narrowPeak | ZBTB49  | HepG2 | 1, 2 TF ChIP-seq |
| ENCFF953JQD | bed narrowPeak | ZBTB7A  | HepG2 | 1, 2 TF ChIP-seq |
| ENCFF725ZBA | bed narrowPeak | ZBTB7B  | HepG2 | 1, 2 TF ChIP-seq |
| ENCFF421QJP | bed narrowPeak | ZBTB8A  | HepG2 | 1, 2 TF ChIP-seq |
| ENCFF847EOB | bed narrowPeak | ZC3H4   | HepG2 | 1, 2 TF ChIP-seq |
| ENCFF049ISU | bed narrowPeak | ZC3H8   | HepG2 | 1, 2 TF ChIP-seq |
| ENCFF060IPX | bed narrowPeak | ZEB1    | HepG2 | 1, 2 TF ChIP-seq |
| ENCFF027UTC | bed narrowPeak | ZFP1    | HepG2 | 1, 2 TF ChIP-seq |
| ENCFF800VNW | bed narrowPeak | ZFP14   | HepG2 | 1, 2 TF ChIP-seq |
| ENCFF166GKK | bed narrowPeak | ZFP36   | HepG2 | 2, 3 TF ChIP-seq |
| ENCFF320EKJ | bed narrowPeak | ZFP36L2 | HepG2 | 1, 2 TF ChIP-seq |
| ENCFF743AUT | bed narrowPeak | ZFP37   | HepG2 | 1, 2 TF ChIP-seq |
| ENCFF853YIS | bed narrowPeak | ZFP41   | HepG2 | 1, 2 TF ChIP-seq |
| ENCFF224RFJ | bed narrowPeak | ZFP62   | HepG2 | 1, 2 TF ChIP-seq |
| ENCFF281KMO | bed narrowPeak | ZFP64   | HepG2 | 1, 2 TF ChIP-seq |
| ENCFF408CTC | bed narrowPeak | ZFP82   | HepG2 | 1, 2 TF ChIP-seq |
| ENCFF099SDO | bed narrowPeak | ZFX     | HepG2 | 1, 2 TF ChIP-seq |
| ENCFF291LHW | bed narrowPeak | ZFY     | HepG2 | 1, 2 TF ChIP-seq |
| ENCFF339GYF | bed narrowPeak | ZGPAT   | HepG2 | 1, 2 TF ChIP-seq |
| ENCFF006LDU | bed narrowPeak | ZHX2    | HepG2 | 1, 2 TF ChIP-seq |
| ENCFF438MZI | bed narrowPeak | ZHX3    | HepG2 | 1, 2 TF ChIP-seq |
| ENCFF009LDQ | bed narrowPeak | ZIK1    | HepG2 | 1, 2 TF ChIP-seq |
| ENCFF721NEC | bed narrowPeak | ZKSCAN1 | HepG2 | 1, 3 TF ChIP-seq |
| ENCFF669MLA | bed narrowPeak | ZKSCAN5 | HepG2 | 1, 2 TF ChIP-seq |
| ENCFF024QKK | bed narrowPeak | ZKSCAN8 | HepG2 | 1, 2 TF ChIP-seq |
| ENCFF896EHN | bed narrowPeak | ZMAT5   | HepG2 | 1, 2 TF ChIP-seq |
| ENCFF640TCA | bed narrowPeak | ZMYM3   | HepG2 | 1, 2 TF ChIP-seq |
| ENCFF321MKV | bed narrowPeak | ZNF10   | HepG2 | 1, 2 TF ChIP-seq |
| ENCFF373KUZ | bed narrowPeak | ZNF101  | HepG2 | 1, 2 TF ChIP-seq |
| ENCFF409PJJ | bed narrowPeak | ZNF12   | HepG2 | 1, 2 TF ChIP-seq |
| ENCFF604THW | bed narrowPeak | ZNF121  | HepG2 | 1, 2 TF ChIP-seq |
| ENCFF683CTP | bed narrowPeak | ZNF124  | HepG2 | 1, 2 TF ChIP-seq |
| ENCFF389YCG | bed narrowPeak | ZNF138  | HepG2 | 1, 2 TF ChIP-seq |
| ENCFF868DTR | bed narrowPeak | ZNF142  | HepG2 | 1, 2 TF ChIP-seq |
| ENCFF698ITQ | bed narrowPeak | ZNF143  | HepG2 | 1, 2 TF ChIP-seq |
| ENCFF300AER | bed narrowPeak | ZNF17   | HepG2 | 1, 2 TF ChIP-seq |
| ENCFF405YXO | bed narrowPeak | ZNF180  | HepG2 | 1, 2 TF ChIP-seq |

|             |                |         |       |                  |
|-------------|----------------|---------|-------|------------------|
| ENCFF627DNU | bed narrowPeak | ZNF20   | HepG2 | 1, 2 TF ChIP-seq |
| ENCFF766KKU | bed narrowPeak | ZNF205  | HepG2 | 1, 2 TF ChIP-seq |
| ENCFF657ZXY | bed narrowPeak | ZNF207  | HepG2 | 1, 2 TF ChIP-seq |
| ENCFF130OKL | bed narrowPeak | ZNF217  | HepG2 | 1, 2 TF ChIP-seq |
| ENCFF708ZFL | bed narrowPeak | ZNF219  | HepG2 | 1, 2 TF ChIP-seq |
| ENCFF772BAU | bed narrowPeak | ZNF224  | HepG2 | 1, 2 TF ChIP-seq |
| ENCFF186RPU | bed narrowPeak | ZNF225  | HepG2 | 1, 2 TF ChIP-seq |
| ENCFF854DNO | bed narrowPeak | ZNF230  | HepG2 | 1, 2 TF ChIP-seq |
| ENCFF119UOZ | bed narrowPeak | ZNF232  | HepG2 | 1, 2 TF ChIP-seq |
| ENCFF858WPR | bed narrowPeak | ZNF24   | HepG2 | 2, 3 TF ChIP-seq |
| ENCFF706SJT | bed narrowPeak | ZNF25   | HepG2 | 1, 2 TF ChIP-seq |
| ENCFF878TPY | bed narrowPeak | ZNF251  | HepG2 | 1, 2 TF ChIP-seq |
| ENCFF612MQA | bed narrowPeak | ZNF260  | HepG2 | 1, 2 TF ChIP-seq |
| ENCFF927JRS | bed narrowPeak | ZNF263  | HepG2 | 1, 2 TF ChIP-seq |
| ENCFF404IUH | bed narrowPeak | ZNF264  | HepG2 | 1, 2 TF ChIP-seq |
| ENCFF823WVL | bed narrowPeak | ZNF274  | HepG2 | 1, 2 TF ChIP-seq |
| ENCFF451VTH | bed narrowPeak | ZNF276  | HepG2 | 1, 2 TF ChIP-seq |
| ENCFF428HNJ | bed narrowPeak | ZNF280B | HepG2 | 1, 2 TF ChIP-seq |
| ENCFF413OMR | bed narrowPeak | ZNF280D | HepG2 | 1, 2 TF ChIP-seq |
| ENCFF964FPZ | bed narrowPeak | ZNF281  | HepG2 | 1, 2 TF ChIP-seq |
| ENCFF482XNG | bed narrowPeak | ZNF282  | HepG2 | 1, 2 TF ChIP-seq |
| ENCFF845MDX | bed narrowPeak | ZNF3    | HepG2 | 1, 2 TF ChIP-seq |
| ENCFF290UUF | bed narrowPeak | ZNF30   | HepG2 | 1, 2 TF ChIP-seq |
| ENCFF865WCB | bed narrowPeak | ZNF317  | HepG2 | 1, 2 TF ChIP-seq |
| ENCFF720DYW | bed narrowPeak | ZNF318  | HepG2 | 1, 2 TF ChIP-seq |
| ENCFF541FQS | bed narrowPeak | ZNF326  | HepG2 | 1, 2 TF ChIP-seq |
| ENCFF731RBX | bed narrowPeak | ZNF329  | HepG2 | 1, 2 TF ChIP-seq |
| ENCFF623DVC | bed narrowPeak | ZNF331  | HepG2 | 1, 2 TF ChIP-seq |
| ENCFF486PIE | bed narrowPeak | ZNF333  | HepG2 | 1, 2 TF ChIP-seq |
| ENCFF034ASW | bed narrowPeak | ZNF335  | HepG2 | 1, 2 TF ChIP-seq |
| ENCFF272IPH | bed narrowPeak | ZNF337  | HepG2 | 1, 2 TF ChIP-seq |
| ENCFF237AST | bed narrowPeak | ZNF33A  | HepG2 | 1, 2 TF ChIP-seq |
| ENCFF135VAJ | bed narrowPeak | ZNF33B  | HepG2 | 1, 2 TF ChIP-seq |
| ENCFF841BQO | bed narrowPeak | ZNF34   | HepG2 | 1, 2 TF ChIP-seq |
| ENCFF415YWK | bed narrowPeak | ZNF343  | HepG2 | 1, 2 TF ChIP-seq |
| ENCFF518ZKO | bed narrowPeak | ZNF350  | HepG2 | 1, 2 TF ChIP-seq |
| ENCFF361PBY | bed narrowPeak | ZNF362  | HepG2 | 1, 2 TF ChIP-seq |
| ENCFF236CPT | bed narrowPeak | ZNF367  | HepG2 | 1, 2 TF ChIP-seq |
| ENCFF524CCS | bed narrowPeak | ZNF382  | HepG2 | 1, 2 TF ChIP-seq |
| ENCFF442ZRY | bed narrowPeak | ZNF383  | HepG2 | 1, 2 TF ChIP-seq |
| ENCFF308CTG | bed narrowPeak | ZNF384  | HepG2 | 1, 2 TF ChIP-seq |
| ENCFF409BJK | bed narrowPeak | ZNF414  | HepG2 | 1, 2 TF ChIP-seq |
| ENCFF632NSF | bed narrowPeak | ZNF430  | HepG2 | 1, 2 TF ChIP-seq |
| ENCFF748KIJ | bed narrowPeak | ZNF432  | HepG2 | 1, 2 TF ChIP-seq |
| ENCFF624TVT | bed narrowPeak | ZNF44   | HepG2 | 1, 2 TF ChIP-seq |
| ENCFF924VAH | bed narrowPeak | ZNF441  | HepG2 | 1, 2 TF ChIP-seq |
| ENCFF645VCZ | bed narrowPeak | ZNF446  | HepG2 | 1, 2 TF ChIP-seq |
| ENCFF628ZKC | bed narrowPeak | ZNF451  | HepG2 | 1, 2 TF ChIP-seq |
| ENCFF261NJZ | bed narrowPeak | ZNF460  | HepG2 | 1, 2 TF ChIP-seq |
| ENCFF543CJD | bed narrowPeak | ZNF48   | HepG2 | 1, 2 TF ChIP-seq |
| ENCFF616FXO | bed narrowPeak | ZNF483  | HepG2 | 1, 2 TF ChIP-seq |
| ENCFF388IZF | bed narrowPeak | ZNF484  | HepG2 | 1, 2 TF ChIP-seq |

|             |                |         |       |                  |
|-------------|----------------|---------|-------|------------------|
| ENCFF837BSM | bed narrowPeak | ZNF485  | HepG2 | 1, 2 TF ChIP-seq |
| ENCFF703APN | bed narrowPeak | ZNF490  | HepG2 | 1, 2 TF ChIP-seq |
| ENCFF322IVF | bed narrowPeak | ZNF501  | HepG2 | 1, 2 TF ChIP-seq |
| ENCFF622FUC | bed narrowPeak | ZNF503  | HepG2 | 1, 2 TF ChIP-seq |
| ENCFF108PPK | bed narrowPeak | ZNF510  | HepG2 | 1, 2 TF ChIP-seq |
| ENCFF390RLO | bed narrowPeak | ZNF511  | HepG2 | 1, 2 TF ChIP-seq |
| ENCFF233OIC | bed narrowPeak | ZNF512  | HepG2 | 1, 2 TF ChIP-seq |
| ENCFF050KYT | bed narrowPeak | ZNF512B | HepG2 | 1, 2 TF ChIP-seq |
| ENCFF753CVD | bed narrowPeak | ZNF526  | HepG2 | 1, 2 TF ChIP-seq |
| ENCFF468WZL | bed narrowPeak | ZNF530  | HepG2 | 1, 2 TF ChIP-seq |
| ENCFF141UZG | bed narrowPeak | ZNF543  | HepG2 | 1, 2 TF ChIP-seq |
| ENCFF825WJM | bed narrowPeak | ZNF547  | HepG2 | 1, 2 TF ChIP-seq |
| ENCFF802DLC | bed narrowPeak | ZNF548  | HepG2 | 1, 2 TF ChIP-seq |
| ENCFF259UJN | bed narrowPeak | ZNF549  | HepG2 | 1, 2 TF ChIP-seq |
| ENCFF414GKA | bed narrowPeak | ZNF550  | HepG2 | 1, 2 TF ChIP-seq |
| ENCFF340TNC | bed narrowPeak | ZNF556  | HepG2 | 1, 2 TF ChIP-seq |
| ENCFF130ZHU | bed narrowPeak | ZNF557  | HepG2 | 1, 2 TF ChIP-seq |
| ENCFF795VJZ | bed narrowPeak | ZNF569  | HepG2 | 1, 2 TF ChIP-seq |
| ENCFF259PTV | bed narrowPeak | ZNF570  | HepG2 | 1, 2 TF ChIP-seq |
| ENCFF841YHN | bed narrowPeak | ZNF572  | HepG2 | 1, 2 TF ChIP-seq |
| ENCFF550VES | bed narrowPeak | ZNF574  | HepG2 | 1, 2 TF ChIP-seq |
| ENCFF115ENN | bed narrowPeak | ZNF576  | HepG2 | 1, 2 TF ChIP-seq |
| ENCFF535BYF | bed narrowPeak | ZNF577  | HepG2 | 1, 2 TF ChIP-seq |
| ENCFF293UEL | bed narrowPeak | ZNF580  | HepG2 | 1, 2 TF ChIP-seq |
| ENCFF464WKR | bed narrowPeak | ZNF597  | HepG2 | 1, 2 TF ChIP-seq |
| ENCFF364DXQ | bed narrowPeak | ZNF598  | HepG2 | 1, 2 TF ChIP-seq |
| ENCFF754OSO | bed narrowPeak | ZNF607  | HepG2 | 1, 2 TF ChIP-seq |
| ENCFF778FIE | bed narrowPeak | ZNF608  | HepG2 | 1, 2 TF ChIP-seq |
| ENCFF667MEL | bed narrowPeak | ZNF609  | HepG2 | 1, 2 TF ChIP-seq |
| ENCFF241JAR | bed narrowPeak | ZNF614  | HepG2 | 1, 2 TF ChIP-seq |
| ENCFF618JPG | bed narrowPeak | ZNF615  | HepG2 | 1, 2 TF ChIP-seq |
| ENCFF255QEY | bed narrowPeak | ZNF616  | HepG2 | 1, 2 TF ChIP-seq |
| ENCFF898ZHK | bed narrowPeak | ZNF619  | HepG2 | 1, 2 TF ChIP-seq |
| ENCFF859VUR | bed narrowPeak | ZNF639  | HepG2 | 1, 2 TF ChIP-seq |
| ENCFF623COM | bed narrowPeak | ZNF644  | HepG2 | 1, 2 TF ChIP-seq |
| ENCFF496HIK | bed narrowPeak | ZNF646  | HepG2 | 1, 2 TF ChIP-seq |
| ENCFF761HIZ | bed narrowPeak | ZNF652  | HepG2 | 1, 2 TF ChIP-seq |
| ENCFF215UIS | bed narrowPeak | ZNF660  | HepG2 | 1, 2 TF ChIP-seq |
| ENCFF450BWT | bed narrowPeak | ZNF674  | HepG2 | 1, 2 TF ChIP-seq |
| ENCFF678IWM | bed narrowPeak | ZNF678  | HepG2 | 1, 2 TF ChIP-seq |
| ENCFF581GZR | bed narrowPeak | ZNF687  | HepG2 | 1, 2 TF ChIP-seq |
| ENCFF296WYX | bed narrowPeak | ZNF691  | HepG2 | 1, 2 TF ChIP-seq |
| ENCFF995ZSA | bed narrowPeak | ZNF7    | HepG2 | 1, 2 TF ChIP-seq |
| ENCFF898LPA | bed narrowPeak | ZNF703  | HepG2 | 1, 2 TF ChIP-seq |
| ENCFF497RWP | bed narrowPeak | ZNF707  | HepG2 | 1, 2 TF ChIP-seq |
| ENCFF371EUU | bed narrowPeak | ZNF709  | HepG2 | 1, 2 TF ChIP-seq |
| ENCFF216JWP | bed narrowPeak | ZNF710  | HepG2 | 1, 2 TF ChIP-seq |
| ENCFF262CSX | bed narrowPeak | ZNF713  | HepG2 | 1, 2 TF ChIP-seq |
| ENCFF879KUL | bed narrowPeak | ZNF720  | HepG2 | 1, 2 TF ChIP-seq |
| ENCFF024LQZ | bed narrowPeak | ZNF737  | HepG2 | 1, 2 TF ChIP-seq |
| ENCFF854KWX | bed narrowPeak | ZNF740  | HepG2 | 1, 2 TF ChIP-seq |
| ENCFF042SUM | bed narrowPeak | ZNF766  | HepG2 | 1, 2 TF ChIP-seq |

|             |                |          |       |                     |
|-------------|----------------|----------|-------|---------------------|
| ENCFF079KQG | bed narrowPeak | ZNF768   | HepG2 | 1, 2 TF ChIP-seq    |
| ENCFF514IUU | bed narrowPeak | ZNF770   | HepG2 | 1, 2 TF ChIP-seq    |
| ENCFF874HXM | bed narrowPeak | ZNF772   | HepG2 | 1, 2 TF ChIP-seq    |
| ENCFF906WDG | bed narrowPeak | ZNF773   | HepG2 | 1, 2 TF ChIP-seq    |
| ENCFF230KZH | bed narrowPeak | ZNF775   | HepG2 | 1, 2 TF ChIP-seq    |
| ENCFF396ZSB | bed narrowPeak | ZNF776   | HepG2 | 1, 2 TF ChIP-seq    |
| ENCFF920PLY | bed narrowPeak | ZNF777   | HepG2 | 1, 2 TF ChIP-seq    |
| ENCFF078ATH | bed narrowPeak | ZNF778   | HepG2 | 1, 2 TF ChIP-seq    |
| ENCFF482XKY | bed narrowPeak | ZNF781   | HepG2 | 1, 2 TF ChIP-seq    |
| ENCFF462RVE | bed narrowPeak | ZNF782   | HepG2 | 1, 2 TF ChIP-seq    |
| ENCFF645BZY | bed narrowPeak | ZNF784   | HepG2 | 1, 2 TF ChIP-seq    |
| ENCFF663KMO | bed narrowPeak | ZNF788   | HepG2 | 1, 2 TF ChIP-seq    |
| ENCFF253CWZ | bed narrowPeak | ZNF792   | HepG2 | 1, 2 TF ChIP-seq    |
| ENCFF618NTX | bed narrowPeak | ZNF800   | HepG2 | 1, 2 TF ChIP-seq    |
| ENCFF621IOC | bed narrowPeak | ZNF83    | HepG2 | 1, 2 TF ChIP-seq    |
| ENCFF332MPQ | bed narrowPeak | ZNF839   | HepG2 | 1, 2 TF ChIP-seq    |
| ENCFF060MHX | bed narrowPeak | ZNF865   | HepG2 | 1, 2 TF ChIP-seq    |
| ENCFF189PKJ | bed narrowPeak | ZNF883   | HepG2 | 1, 2 TF ChIP-seq    |
| ENCFF903IZG | bed narrowPeak | ZNF891   | HepG2 | 1, 2 TF ChIP-seq    |
| ENCFF594DAV | bed narrowPeak | ZSCAN12  | HepG2 | 1, 2 TF ChIP-seq    |
| ENCFF505AEY | bed narrowPeak | ZSCAN20  | HepG2 | 1, 2 TF ChIP-seq    |
| ENCFF904LYG | bed narrowPeak | ZSCAN22  | HepG2 | 1, 2 TF ChIP-seq    |
| ENCFF560NWT | bed narrowPeak | ZSCAN30  | HepG2 | 1, 2 TF ChIP-seq    |
| ENCFF810TWJ | bed narrowPeak | ZSCAN31  | HepG2 | 1, 2 TF ChIP-seq    |
| ENCFF673YDK | bed narrowPeak | ZSCAN9   | HepG2 | 1, 2 TF ChIP-seq    |
| ENCFF594JNI | bed narrowPeak | ZUFSP    | HepG2 | 1, 2 TF ChIP-seq    |
| ENCFF044XYZ | bed narrowPeak | ZXDC     | HepG2 | 1, 2 TF ChIP-seq    |
| ENCFF791UUM | bed narrowPeak | ZZZ3     | HepG2 | 1, 2 TF ChIP-seq    |
| ENCFF739AJO | bed narrowPeak | ADNP     | K562  | 1, 2 TF ChIP-seq    |
| ENCFF489SKQ | bed narrowPeak | AFF1     | K562  | 1, 2 TF ChIP-seq    |
| ENCFF100VYA | bed narrowPeak | AGO1     | K562  | 1, 2 TF ChIP-seq    |
| ENCFF089PKE | bed narrowPeak | ARHGAP35 | K562  | 1, 2 TF ChIP-seq    |
| ENCFF879NTL | bed narrowPeak | ARID1B   | K562  | 1, 2 TF ChIP-seq    |
| ENCFF344MKI | bed narrowPeak | ARID2    | K562  | 1, 2 TF ChIP-seq    |
| ENCFF891OQP | bed narrowPeak | ARID3A   | K562  | 1, 2 TF ChIP-seq    |
| ENCFF270TSN | bed narrowPeak | ARID3B   | K562  | 1, 2 TF ChIP-seq    |
| ENCFF655EFA | bed narrowPeak | ARNT     | K562  | 1, 2 TF ChIP-seq    |
| ENCFF958YSG | bed narrowPeak | ASH1L    | K562  | 1, 2 TF ChIP-seq    |
| ENCFF206BGR | bed narrowPeak | ATF1     | K562  | 1, 2 TF ChIP-seq    |
| ENCFF803FHN | bed narrowPeak | ATF2     | K562  | 1, 2 TF ChIP-seq    |
| ENCFF718VHT | bed narrowPeak | ATF3     | K562  | 1, 2 TF ChIP-seq    |
| ENCFF182MNO | bed narrowPeak | ATF4     | K562  | 1, 2 TF ChIP-seq    |
| ENCFF863ZFH | bed narrowPeak | ATF6     | K562  | 1, 2 TF ChIP-seq    |
| ENCFF371SJR | bed narrowPeak | ATF7     | K562  | 1, 2 TF ChIP-seq    |
| ENCFF026BDA | bed narrowPeak | BACH1    | K562  | 1, 2 TF ChIP-seq    |
| ENCFF941EDY | bed narrowPeak | BCL6     | K562  | 1, 2 TF ChIP-seq    |
| ENCFF070ZTX | bed narrowPeak | BCLAF1   | K562  | 1, 2 TF ChIP-seq    |
| ENCFF186JKG | bed narrowPeak | BCOR     | K562  | 1, 2 TF ChIP-seq    |
| ENCFF284FTY | bed narrowPeak | BDP1     | K562  | 1, 2, 3 TF ChIP-seq |
| ENCFF154IVU | bed narrowPeak | BHLHE40  | K562  | 1, 2 TF ChIP-seq    |
| ENCFF352DRR | bed narrowPeak | BMI1     | K562  | 1, 2 TF ChIP-seq    |
| ENCFF620FIH | bed narrowPeak | BRCA1    | K562  | 1, 2 TF ChIP-seq    |



|             |                |          |      |                     |
|-------------|----------------|----------|------|---------------------|
| ENCFF130JVF | bed narrowPeak | BRD4     | K562 | 1, 2 TF ChIP-seq    |
| ENCFF411RMT | bed narrowPeak | BRD9     | K562 | 1, 2 TF ChIP-seq    |
| ENCFF577LSK | bed narrowPeak | BRF1     | K562 | 1, 2, 3 TF ChIP-seq |
| ENCFF944LWS | bed narrowPeak | BRF2     | K562 | 1, 2, 3 TF ChIP-seq |
| ENCFF104MXG | bed narrowPeak | C11orf30 | K562 | 1, 2 TF ChIP-seq    |
| ENCFF419PEK | bed narrowPeak | CBFA2T2  | K562 | 1, 2 TF ChIP-seq    |
| ENCFF153IFH | bed narrowPeak | CBFA2T3  | K562 | 1, 2 TF ChIP-seq    |
| ENCFF802NHC | bed narrowPeak | CBFB     | K562 | 1, 2 TF ChIP-seq    |
| ENCFF163FLA | bed narrowPeak | CBX1     | K562 | 1, 2 TF ChIP-seq    |
| ENCFF258XBJ | bed narrowPeak | CBX2     | K562 | 1 TF ChIP-seq       |
| ENCFF068OEJ | bed narrowPeak | CBX3     | K562 | 1 TF ChIP-seq       |
| ENCFF403TAE | bed narrowPeak | CBX5     | K562 | 1, 2 TF ChIP-seq    |
| ENCFF210GJE | bed narrowPeak | CBX8     | K562 | 1, 2 TF ChIP-seq    |
| ENCFF180TUM | bed narrowPeak | CC2D1A   | K562 | 1, 2 TF ChIP-seq    |
| ENCFF704PGT | bed narrowPeak | CCAR2    | K562 | 1, 2 TF ChIP-seq    |
| ENCFF642ZYO | bed narrowPeak | CCNT2    | K562 | 1, 2 TF ChIP-seq    |
| ENCFF384ALH | bed narrowPeak | CDC5L    | K562 | 1, 2 TF ChIP-seq    |
| ENCFF882ARK | bed narrowPeak | CEBPB    | K562 | 1, 2 TF ChIP-seq    |
| ENCFF797MRW | bed narrowPeak | CEBPG    | K562 | 1, 2 TF ChIP-seq    |
| ENCFF588GNU | bed narrowPeak | CEBPZ    | K562 | 1, 4 TF ChIP-seq    |
| ENCFF771XZZ | bed narrowPeak | CGGBP1   | K562 | 1, 2 TF ChIP-seq    |
| ENCFF646MEF | bed narrowPeak | CHAMP1   | K562 | 1, 2 TF ChIP-seq    |
| ENCFF408NUX | bed narrowPeak | CHD1     | K562 | 1 TF ChIP-seq       |
| ENCFF947AEO | bed narrowPeak | CHD2     | K562 | 1, 2 TF ChIP-seq    |
| ENCFF985QBS | bed narrowPeak | CHD4     | K562 | 1, 2, 3 TF ChIP-seq |
| ENCFF722UJW | bed narrowPeak | CHD7     | K562 | 1 TF ChIP-seq       |
| ENCFF648UJW | bed narrowPeak | CLOCK    | K562 | 1, 2 TF ChIP-seq    |
| ENCFF552EBC | bed narrowPeak | COPS2    | K562 | 1, 2 TF ChIP-seq    |
| ENCFF193LLN | bed narrowPeak | CREB1    | K562 | 1, 2 TF ChIP-seq    |
| ENCFF606EUI | bed narrowPeak | CREB3    | K562 | 1, 2 TF ChIP-seq    |
| ENCFF566HGU | bed narrowPeak | CREB3L1  | K562 | 1, 2 TF ChIP-seq    |
| ENCFF875JMR | bed narrowPeak | CREB5    | K562 | 1, 2 TF ChIP-seq    |
| ENCFF532VPN | bed narrowPeak | CREBBP   | K562 | 1 TF ChIP-seq       |
| ENCFF021XJN | bed narrowPeak | CREM     | K562 | 1, 2 TF ChIP-seq    |
| ENCFF351DBE | bed narrowPeak | CSDE1    | K562 | 1, 2 TF ChIP-seq    |
| ENCFF349UTF | bed narrowPeak | CTBP1    | K562 | 1, 2 TF ChIP-seq    |
| ENCFF221SKA | bed narrowPeak | CTCF     | K562 | 1, 2, 3 TF ChIP-seq |
| ENCFF630YVJ | bed narrowPeak | CTCFL    | K562 | 1, 2 TF ChIP-seq    |
| ENCFF136KLM | bed narrowPeak | CUX1     | K562 | 1, 2 TF ChIP-seq    |
| ENCFF870LJV | bed narrowPeak | DACH1    | K562 | 1, 2 TF ChIP-seq    |
| ENCFF869RFC | bed narrowPeak | DDIT3    | K562 | 1, 2 TF ChIP-seq    |
| ENCFF536LKB | bed narrowPeak | DDX20    | K562 | 1, 2 TF ChIP-seq    |
| ENCFF030AXK | bed narrowPeak | DEAF1    | K562 | 1, 2 TF ChIP-seq    |
| ENCFF108JFW | bed narrowPeak | DIDO1    | K562 | 1, 2 TF ChIP-seq    |
| ENCFF832DBU | bed narrowPeak | DLX4     | K562 | 1, 2 TF ChIP-seq    |
| ENCFF549TVW | bed narrowPeak | DNMT1    | K562 | 1, 2 TF ChIP-seq    |
| ENCFF542HJS | bed narrowPeak | DPF2     | K562 | 1, 2 TF ChIP-seq    |
| ENCFF104VFF | bed narrowPeak | E2F1     | K562 | 1, 2 TF ChIP-seq    |
| ENCFF710UAZ | bed narrowPeak | E2F3     | K562 | 1, 2 TF ChIP-seq    |
| ENCFF225TLP | bed narrowPeak | E2F4     | K562 | 1, 2 TF ChIP-seq    |
| ENCFF468VJV | bed narrowPeak | E2F5     | K562 | 1, 2 TF ChIP-seq    |
| ENCFF831NDQ | bed narrowPeak | E2F6     | K562 | 1, 2 TF ChIP-seq    |

|             |                |         |      |                     |
|-------------|----------------|---------|------|---------------------|
| ENCFF013EHI | bed narrowPeak | E2F7    | K562 | 1, 2 TF ChIP-seq    |
| ENCFF171WWF | bed narrowPeak | E2F8    | K562 | 1, 2 TF ChIP-seq    |
| ENCFF683WRK | bed narrowPeak | E4F1    | K562 | 1, 2 TF ChIP-seq    |
| ENCFF566PRZ | bed narrowPeak | EGR1    | K562 | 1, 2 TF ChIP-seq    |
| ENCFF682XPD | bed narrowPeak | EHMT2   | K562 | 1, 2 TF ChIP-seq    |
| ENCFF133TSU | bed narrowPeak | ELF1    | K562 | 1, 2 TF ChIP-seq    |
| ENCFF695PDY | bed narrowPeak | ELF2    | K562 | 1, 2 TF ChIP-seq    |
| ENCFF539SXG | bed narrowPeak | ELF4    | K562 | 1, 2 TF ChIP-seq    |
| ENCFF119SCQ | bed narrowPeak | ELK1    | K562 | 1, 2 TF ChIP-seq    |
| ENCFF198NGY | bed narrowPeak | ELK3    | K562 | 1, 2 TF ChIP-seq    |
| ENCFF821MKR | bed narrowPeak | EP300   | K562 | 1, 2 TF ChIP-seq    |
| ENCFF167CQF | bed narrowPeak | EP400   | K562 | 1, 2 TF ChIP-seq    |
| ENCFF462ZIG | bed narrowPeak | ERF     | K562 | 1, 2 TF ChIP-seq    |
| ENCFF592GWM | bed narrowPeak | ESRRA   | K562 | 1, 2 TF ChIP-seq    |
| ENCFF106ECV | bed narrowPeak | ESRRB   | K562 | 1, 2 TF ChIP-seq    |
| ENCFF461PRP | bed narrowPeak | ETS1    | K562 | 1, 2 TF ChIP-seq    |
| ENCFF687OMH | bed narrowPeak | ETS2    | K562 | 1, 2 TF ChIP-seq    |
| ENCFF804KSB | bed narrowPeak | ETV1    | K562 | 1, 2 TF ChIP-seq    |
| ENCFF604LXR | bed narrowPeak | ETV5    | K562 | 1, 2 TF ChIP-seq    |
| ENCFF426GSY | bed narrowPeak | ETV6    | K562 | 1, 2 TF ChIP-seq    |
| ENCFF560CYG | bed narrowPeak | EWSR1   | K562 | 1, 2 TF ChIP-seq    |
| ENCFF804RVA | bed narrowPeak | EZH2    | K562 | 1, 2 TF ChIP-seq    |
| ENCFF285TMA | bed narrowPeak | FIP1L1  | K562 | 1, 2 TF ChIP-seq    |
| ENCFF258PLH | bed narrowPeak | FOS     | K562 | 1, 2, 3 TF ChIP-seq |
| ENCFF004HXL | bed narrowPeak | FOSL1   | K562 | 1, 2 TF ChIP-seq    |
| ENCFF765NAN | bed narrowPeak | FOXA1   | K562 | 1, 2 TF ChIP-seq    |
| ENCFF957CVJ | bed narrowPeak | FOXJ2   | K562 | 1, 2 TF ChIP-seq    |
| ENCFF567CPM | bed narrowPeak | FOXJ3   | K562 | 1, 2 TF ChIP-seq    |
| ENCFF066CWG | bed narrowPeak | FOXK2   | K562 | 1, 2 TF ChIP-seq    |
| ENCFF778PWE | bed narrowPeak | FOXM1   | K562 | 1, 2 TF ChIP-seq    |
| ENCFF750AGR | bed narrowPeak | FOXO4   | K562 | 1, 2 TF ChIP-seq    |
| ENCFF688ARM | bed narrowPeak | FUS     | K562 | 1, 2 TF ChIP-seq    |
| ENCFF489EME | bed narrowPeak | GABPA   | K562 | 1, 2 TF ChIP-seq    |
| ENCFF700DXR | bed narrowPeak | GABPB1  | K562 | 1, 2 TF ChIP-seq    |
| ENCFF657CTC | bed narrowPeak | GATA1   | K562 | 1, 2 TF ChIP-seq    |
| ENCFF165ZEP | bed narrowPeak | GATA2   | K562 | 1, 2 TF ChIP-seq    |
| ENCFF950ZWP | bed narrowPeak | GATAD2A | K562 | 1, 2 TF ChIP-seq    |
| ENCFF569CMJ | bed narrowPeak | GATAD2B | K562 | 1, 2 TF ChIP-seq    |
| ENCFF365ETH | bed narrowPeak | GMEB1   | K562 | 1, 2 TF ChIP-seq    |
| ENCFF839QEL | bed narrowPeak | GTF2A2  | K562 | 1, 2 TF ChIP-seq    |
| ENCFF970ULG | bed narrowPeak | GTF2B   | K562 | 1, 2 TF ChIP-seq    |
| ENCFF564KIU | bed narrowPeak | GTF2E2  | K562 | 1, 2 TF ChIP-seq    |
| ENCFF843UHP | bed narrowPeak | GTF2F1  | K562 | 1, 2 TF ChIP-seq    |
| ENCFF866OZW | bed narrowPeak | GTF2I   | K562 | 1, 2 TF ChIP-seq    |
| ENCFF496PIQ | bed narrowPeak | GTF3C2  | K562 | 1, 2, 3 TF ChIP-seq |
| ENCFF139FMU | bed narrowPeak | HCFC1   | K562 | 1, 2 TF ChIP-seq    |
| ENCFF188TBM | bed narrowPeak | HDAC1   | K562 | 1, 2 TF ChIP-seq    |
| ENCFF519RWJ | bed narrowPeak | HDAC2   | K562 | 1, 2 TF ChIP-seq    |
| ENCFF742LSD | bed narrowPeak | HDAC3   | K562 | 3, 4 TF ChIP-seq    |
| ENCFF295GBP | bed narrowPeak | HDAC6   | K562 | 1, 2 TF ChIP-seq    |
| ENCFF349GBE | bed narrowPeak | HDAC8   | K562 | 1, 2 TF ChIP-seq    |
| ENCFF297WMY | bed narrowPeak | HDGF    | K562 | 1, 2 TF ChIP-seq    |

|             |                |          |      |                     |
|-------------|----------------|----------|------|---------------------|
| ENCFF010OOE | bed narrowPeak | HES1     | K562 | 1, 2 TF ChIP-seq    |
| ENCFF180KAV | bed narrowPeak | HEY1     | K562 | 1, 2 TF ChIP-seq    |
| ENCFF558VAL | bed narrowPeak | HINFP    | K562 | 1, 2 TF ChIP-seq    |
| ENCFF449JMB | bed narrowPeak | HIVEP1   | K562 | 1, 2 TF ChIP-seq    |
| ENCFF689LNQ | bed narrowPeak | HLTF     | K562 | 1, 2 TF ChIP-seq    |
| ENCFF718DFX | bed narrowPeak | HMBOX1   | K562 | 1, 2 TF ChIP-seq    |
| ENCFF099OSI | bed narrowPeak | HMG20B   | K562 | 1, 2 TF ChIP-seq    |
| ENCFF615AKB | bed narrowPeak | HMG3     | K562 | 1, 2 TF ChIP-seq    |
| ENCFF844QFF | bed narrowPeak | HNRNPH1  | K562 | 1, 2 TF ChIP-seq    |
| ENCFF984QUV | bed narrowPeak | HNRNPK   | K562 | 1, 2 TF ChIP-seq    |
| ENCFF984ESZ | bed narrowPeak | HNRNPL   | K562 | 1, 2 TF ChIP-seq    |
| ENCFF662WPN | bed narrowPeak | HNRNPLL  | K562 | 1, 2 TF ChIP-seq    |
| ENCFF991ZSC | bed narrowPeak | HNRNPUL1 | K562 | 1, 2 TF ChIP-seq    |
| ENCFF601LMD | bed narrowPeak | HOMEZ    | K562 | 1, 2 TF ChIP-seq    |
| ENCFF794SCQ | bed narrowPeak | ID3      | K562 | 1, 2 TF ChIP-seq    |
| ENCFF994OQH | bed narrowPeak | IKZF1    | K562 | 1, 2 TF ChIP-seq    |
| ENCFF368AAQ | bed narrowPeak | ILF3     | K562 | 1, 4 TF ChIP-seq    |
| ENCFF406XWT | bed narrowPeak | ILK      | K562 | 1, 2 TF ChIP-seq    |
| ENCFF203LRV | bed narrowPeak | IRF1     | K562 | 1, 2 TF ChIP-seq    |
| ENCFF886EVL | bed narrowPeak | IRF2     | K562 | 1, 3 TF ChIP-seq    |
| ENCFF863WCN | bed narrowPeak | IRF9     | K562 | 1, 2 TF ChIP-seq    |
| ENCFF589QXC | bed narrowPeak | JUN      | K562 | 1, 2 TF ChIP-seq    |
| ENCFF362UGH | bed narrowPeak | JUNB     | K562 | 1, 2 TF ChIP-seq    |
| ENCFF273KIA | bed narrowPeak | JUND     | K562 | 1, 2, 3 TF ChIP-seq |
| ENCFF349VSP | bed narrowPeak | KAT2B    | K562 | 1 TF ChIP-seq       |
| ENCFF207ZEK | bed narrowPeak | KAT8     | K562 | 1, 2 TF ChIP-seq    |
| ENCFF054XCG | bed narrowPeak | KDM1A    | K562 | 1, 2, 3 TF ChIP-seq |
| ENCFF955AOD | bed narrowPeak | KDM4B    | K562 | 1, 2 TF ChIP-seq    |
| ENCFF807FNB | bed narrowPeak | KDM5B    | K562 | 1, 2 TF ChIP-seq    |
| ENCFF317QKH | bed narrowPeak | KHSRP    | K562 | 3, 4 TF ChIP-seq    |
| ENCFF287GDT | bed narrowPeak | KLF1     | K562 | 1, 2 TF ChIP-seq    |
| ENCFF142ZTD | bed narrowPeak | KLF10    | K562 | 1, 2 TF ChIP-seq    |
| ENCFF381GEK | bed narrowPeak | KLF13    | K562 | 1, 2 TF ChIP-seq    |
| ENCFF488OTN | bed narrowPeak | KLF16    | K562 | 1, 2 TF ChIP-seq    |
| ENCFF563ZJM | bed narrowPeak | KLF6     | K562 | 1, 2 TF ChIP-seq    |
| ENCFF423LPW | bed narrowPeak | L3MBTL2  | K562 | 1, 2 TF ChIP-seq    |
| ENCFF668ZTJ | bed narrowPeak | LARP7    | K562 | 1, 2 TF ChIP-seq    |
| ENCFF134HQP | bed narrowPeak | LEF1     | K562 | 3, 4 TF ChIP-seq    |
| ENCFF119AHD | bed narrowPeak | MAFF     | K562 | 1, 2 TF ChIP-seq    |
| ENCFF393CCU | bed narrowPeak | MAFG     | K562 | 1, 2 TF ChIP-seq    |
| ENCFF439TJM | bed narrowPeak | MAFK     | K562 | 1, 2 TF ChIP-seq    |
| ENCFF822FKQ | bed narrowPeak | MAX      | K562 | 1, 2 TF ChIP-seq    |
| ENCFF837NNR | bed narrowPeak | MAZ      | K562 | 1, 2 TF ChIP-seq    |
| ENCFF617QSK | bed narrowPeak | MBD2     | K562 | 1, 3 TF ChIP-seq    |
| ENCFF571REC | bed narrowPeak | MCM2     | K562 | 1, 2 TF ChIP-seq    |
| ENCFF672PYP | bed narrowPeak | MCM3     | K562 | 1, 2 TF ChIP-seq    |
| ENCFF658SJY | bed narrowPeak | MCM5     | K562 | 1, 2 TF ChIP-seq    |
| ENCFF914ELA | bed narrowPeak | MCM7     | K562 | 1, 2 TF ChIP-seq    |
| ENCFF031NTF | bed narrowPeak | MEF2A    | K562 | 1, 2 TF ChIP-seq    |
| ENCFF436DME | bed narrowPeak | MEF2D    | K562 | 1, 2 TF ChIP-seq    |
| ENCFF937UEE | bed narrowPeak | MEIS2    | K562 | 1, 2 TF ChIP-seq    |
| ENCFF524ZER | bed narrowPeak | MGA      | K562 | 1, 2 TF ChIP-seq    |

|             |                |         |      |                     |
|-------------|----------------|---------|------|---------------------|
| ENCFF163YZB | bed narrowPeak | MIER1   | K562 | 1, 2 TF ChIP-seq    |
| ENCFF262TMM | bed narrowPeak | MITF    | K562 | 3, 4 TF ChIP-seq    |
| ENCFF010AIG | bed narrowPeak | MLLT1   | K562 | 1, 2 TF ChIP-seq    |
| ENCFF926CRV | bed narrowPeak | MNT     | K562 | 1, 2 TF ChIP-seq    |
| ENCFF801KEW | bed narrowPeak | MTA1    | K562 | 1, 2 TF ChIP-seq    |
| ENCFF080IBW | bed narrowPeak | MTA2    | K562 | 1, 2 TF ChIP-seq    |
| ENCFF459XLR | bed narrowPeak | MTA3    | K562 | 2, 3 TF ChIP-seq    |
| ENCFF068IGH | bed narrowPeak | MXI1    | K562 | 1, 2 TF ChIP-seq    |
| ENCFF637PFI | bed narrowPeak | MYBL2   | K562 | 1, 2 TF ChIP-seq    |
| ENCFF566CTX | bed narrowPeak | MYC     | K562 | 1, 2, 3 TF ChIP-seq |
| ENCFF516ZEQ | bed narrowPeak | MYNN    | K562 | 1, 2 TF ChIP-seq    |
| ENCFF728KKP | bed narrowPeak | NBN     | K562 | 1, 2 TF ChIP-seq    |
| ENCFF474QDS | bed narrowPeak | NCOA1   | K562 | 1, 2 TF ChIP-seq    |
| ENCFF584SNZ | bed narrowPeak | NCOA2   | K562 | 1, 2 TF ChIP-seq    |
| ENCFF749HKV | bed narrowPeak | NCOA4   | K562 | 1, 2 TF ChIP-seq    |
| ENCFF438BWN | bed narrowPeak | NCOA6   | K562 | 1, 2 TF ChIP-seq    |
| ENCFF816AEF | bed narrowPeak | NCOR1   | K562 | 1 TF ChIP-seq       |
| ENCFF265KKE | bed narrowPeak | NELFE   | K562 | 1, 2 TF ChIP-seq    |
| ENCFF625QHR | bed narrowPeak | NEUROD1 | K562 | 1, 2 TF ChIP-seq    |
| ENCFF430JFH | bed narrowPeak | NFATC3  | K562 | 1, 2 TF ChIP-seq    |
| ENCFF286HTI | bed narrowPeak | NFE2    | K562 | 1, 2 TF ChIP-seq    |
| ENCFF462UJN | bed narrowPeak | NFE2L1  | K562 | 1, 2 TF ChIP-seq    |
| ENCFF169MAE | bed narrowPeak | NFIC    | K562 | 1, 2 TF ChIP-seq    |
| ENCFF726LLI | bed narrowPeak | NFIX    | K562 | 1, 2 TF ChIP-seq    |
| ENCFF158FUG | bed narrowPeak | NFRKB   | K562 | 1, 2 TF ChIP-seq    |
| ENCFF201WFM | bed narrowPeak | NFXL1   | K562 | 1, 2 TF ChIP-seq    |
| ENCFF908HSL | bed narrowPeak | NFYA    | K562 | 1, 2 TF ChIP-seq    |
| ENCFF718ZFY | bed narrowPeak | NFYB    | K562 | 1, 2 TF ChIP-seq    |
| ENCFF520QSR | bed narrowPeak | NKRF    | K562 | 1, 2 TF ChIP-seq    |
| ENCFF211TTD | bed narrowPeak | NONO    | K562 | 1, 2 TF ChIP-seq    |
| ENCFF305OOU | bed narrowPeak | NR0B1   | K562 | 1, 2 TF ChIP-seq    |
| ENCFF798KXN | bed narrowPeak | NR1H2   | K562 | 1, 2 TF ChIP-seq    |
| ENCFF431GJK | bed narrowPeak | NR2C1   | K562 | 1, 2 TF ChIP-seq    |
| ENCFF789AXP | bed narrowPeak | NR2C2   | K562 | 1, 2 TF ChIP-seq    |
| ENCFF363IQN | bed narrowPeak | NR2F1   | K562 | 1, 2 TF ChIP-seq    |
| ENCFF118HUH | bed narrowPeak | NR2F2   | K562 | 1, 2 TF ChIP-seq    |
| ENCFF835FPJ | bed narrowPeak | NR2F6   | K562 | 1, 2 TF ChIP-seq    |
| ENCFF821YMC | bed narrowPeak | NR3C1   | K562 | 1, 2 TF ChIP-seq    |
| ENCFF137TCL | bed narrowPeak | NR4A1   | K562 | 1, 2 TF ChIP-seq    |
| ENCFF410RJD | bed narrowPeak | NRF1    | K562 | 1, 2 TF ChIP-seq    |
| ENCFF885JMZ | bed narrowPeak | NUFIP1  | K562 | 1, 2 TF ChIP-seq    |
| ENCFF743JFJ | bed narrowPeak | PATZ1   | K562 | 1, 2 TF ChIP-seq    |
| ENCFF685CMQ | bed narrowPeak | PBX2    | K562 | 1, 2 TF ChIP-seq    |
| ENCFF956MGE | bed narrowPeak | PCBP1   | K562 | 1, 2 TF ChIP-seq    |
| ENCFF941XZW | bed narrowPeak | PCBP2   | K562 | 1, 2 TF ChIP-seq    |
| ENCFF424OWM | bed narrowPeak | PHB     | K562 | 1, 2 TF ChIP-seq    |
| ENCFF988OXX | bed narrowPeak | PHB2    | K562 | 1, 2 TF ChIP-seq    |
| ENCFF259HUS | bed narrowPeak | PHF20   | K562 | 1, 2 TF ChIP-seq    |
| ENCFF657UVA | bed narrowPeak | PHF21A  | K562 | 1, 2 TF ChIP-seq    |
| ENCFF981ISM | bed narrowPeak | PHF8    | K562 | 2, 3 TF ChIP-seq    |
| ENCFF130WQT | bed narrowPeak | PHTF2   | K562 | 1, 2 TF ChIP-seq    |
| ENCFF062VBB | bed narrowPeak | PKNOX1  | K562 | 1, 2 TF ChIP-seq    |

|             |                |                 |      |                     |
|-------------|----------------|-----------------|------|---------------------|
| ENCFF800QDU | bed narrowPeak | PML             | K562 | 1, 2 TF ChIP-seq    |
| ENCFF634JRD | bed narrowPeak | POLR2A          | K562 | 1, 2 TF ChIP-seq    |
| ENCFF950YZE | bed narrowPeak | POLR2AphosphoS2 | K562 | 1, 2 TF ChIP-seq    |
| ENCFF060MMW | bed narrowPeak | POLR2AphosphoS5 | K562 | 1, 2 TF ChIP-seq    |
| ENCFF821QOS | bed narrowPeak | POLR2B          | K562 | 1, 2 TF ChIP-seq    |
| ENCFF413LLO | bed narrowPeak | POLR2G          | K562 | 1, 2 TF ChIP-seq    |
| ENCFF084KHS | bed narrowPeak | POLR2H          | K562 | 1, 2 TF ChIP-seq    |
| ENCFF627DJP | bed narrowPeak | POLR3A          | K562 | 1, 2 TF ChIP-seq    |
| ENCFF307GHJ | bed narrowPeak | POLR3G          | K562 | 1, 2 TF ChIP-seq    |
| ENCFF814QPF | bed narrowPeak | POU5F1          | K562 | 1, 2 TF ChIP-seq    |
| ENCFF600HPZ | bed narrowPeak | PRDM10          | K562 | 1, 2 TF ChIP-seq    |
| ENCFF018TNP | bed narrowPeak | PRMT5           | K562 | 1, 2 TF ChIP-seq    |
| ENCFF417RQZ | bed narrowPeak | PRPF4           | K562 | 1, 2 TF ChIP-seq    |
| ENCFF835NOD | bed narrowPeak | PTBP1           | K562 | 1, 2 TF ChIP-seq    |
| ENCFF229BQZ | bed narrowPeak | PTRF            | K562 | 1, 2 TF ChIP-seq    |
| ENCFF587PBU | bed narrowPeak | PTTG1           | K562 | 1, 2 TF ChIP-seq    |
| ENCFF500BWO | bed narrowPeak | PURB            | K562 | 1, 2 TF ChIP-seq    |
| ENCFF720FJY | bed narrowPeak | PYGO2           | K562 | 1, 2 TF ChIP-seq    |
| ENCFF930WPG | bed narrowPeak | RAD21           | K562 | 1, 2 TF ChIP-seq    |
| ENCFF740OPF | bed narrowPeak | RAD51           | K562 | 1, 2 TF ChIP-seq    |
| ENCFF328QZM | bed narrowPeak | RB1             | K562 | 3, 4 TF ChIP-seq    |
| ENCFF942VGF | bed narrowPeak | RBBP5           | K562 | 1, 2 TF ChIP-seq    |
| ENCFF538ACI | bed narrowPeak | RBFOX2          | K562 | 1, 2 TF ChIP-seq    |
| ENCFF465UMU | bed narrowPeak | RBM14           | K562 | 1, 2 TF ChIP-seq    |
| ENCFF563WDZ | bed narrowPeak | RBM15           | K562 | 1, 2 TF ChIP-seq    |
| ENCFF056OIG | bed narrowPeak | RBM17           | K562 | 1, 2 TF ChIP-seq    |
| ENCFF420IBN | bed narrowPeak | RBM22           | K562 | 1, 2 TF ChIP-seq    |
| ENCFF849VEO | bed narrowPeak | RBM25           | K562 | 1, 2 TF ChIP-seq    |
| ENCFF670ILH | bed narrowPeak | RBM34           | K562 | 1, 2 TF ChIP-seq    |
| ENCFF503DIK | bed narrowPeak | RBM39           | K562 | 1, 2 TF ChIP-seq    |
| ENCFF691JZW | bed narrowPeak | RBPJ            | K562 | 1, 2 TF ChIP-seq    |
| ENCFF627PLM | bed narrowPeak | RCOR1           | K562 | 1, 2 TF ChIP-seq    |
| ENCFF931SVP | bed narrowPeak | RELA            | K562 | 1, 2 TF ChIP-seq    |
| ENCFF539MIO | bed narrowPeak | REST            | K562 | 1, 2, 3 TF ChIP-seq |
| ENCFF193PVX | bed narrowPeak | RFX1            | K562 | 3, 4 TF ChIP-seq    |
| ENCFF201YKU | bed narrowPeak | RFX5            | K562 | 1, 2 TF ChIP-seq    |
| ENCFF774NZZ | bed narrowPeak | RFX7            | K562 | 1, 2 TF ChIP-seq    |
| ENCFF599CBB | bed narrowPeak | RLF             | K562 | 2, 3 TF ChIP-seq    |
| ENCFF271MJE | bed narrowPeak | RNF2            | K562 | 1, 2 TF ChIP-seq    |
| ENCFF057RJK | bed narrowPeak | RREB1           | K562 | 1, 2 TF ChIP-seq    |
| ENCFF003LPE | bed narrowPeak | RUNX1           | K562 | 1, 2 TF ChIP-seq    |
| ENCFF537RNU | bed narrowPeak | SAFB            | K562 | 1, 2 TF ChIP-seq    |
| ENCFF087DKT | bed narrowPeak | SAFB2           | K562 | 1, 2 TF ChIP-seq    |
| ENCFF383IEP | bed narrowPeak | SAP30           | K562 | 1, 2 TF ChIP-seq    |
| ENCFF752EMN | bed narrowPeak | SETDB1          | K562 | 1, 2 TF ChIP-seq    |
| ENCFF652ZEN | bed narrowPeak | SFPQ            | K562 | 1, 2 TF ChIP-seq    |
| ENCFF078EPC | bed narrowPeak | SHOX2           | K562 | 1, 2 TF ChIP-seq    |
| ENCFF884MNF | bed narrowPeak | SIN3A           | K562 | 1, 2 TF ChIP-seq    |
| ENCFF543INR | bed narrowPeak | SIN3B           | K562 | 5, 6 TF ChIP-seq    |
| ENCFF217ACS | bed narrowPeak | SIRT6           | K562 | 1, 2 TF ChIP-seq    |
| ENCFF754ZWP | bed narrowPeak | SIX5            | K562 | 1, 2 TF ChIP-seq    |
| ENCFF254QDM | bed narrowPeak | SKIL            | K562 | 2, 3 TF ChIP-seq    |

|             |                |         |      |                  |
|-------------|----------------|---------|------|------------------|
| ENCFF084BUP | bed narrowPeak | SMAD1   | K562 | 1, 2 TF ChIP-seq |
| ENCFF186MFI | bed narrowPeak | SMAD2   | K562 | 1, 2 TF ChIP-seq |
| ENCFF069AAY | bed narrowPeak | SMAD5   | K562 | 1, 2 TF ChIP-seq |
| ENCFF267OGF | bed narrowPeak | SMARCA4 | K562 | 1, 2 TF ChIP-seq |
| ENCFF481TNF | bed narrowPeak | SMARCA5 | K562 | 1, 2 TF ChIP-seq |
| ENCFF308QHX | bed narrowPeak | SMARCB1 | K562 | 1, 2 TF ChIP-seq |
| ENCFF751ZVX | bed narrowPeak | SMARCC2 | K562 | 1, 3 TF ChIP-seq |
| ENCFF148YMC | bed narrowPeak | SMARCE1 | K562 | 1, 2 TF ChIP-seq |
| ENCFF175UEE | bed narrowPeak | SMC3    | K562 | 1, 2 TF ChIP-seq |
| ENCFF656THP | bed narrowPeak | SNAPC5  | K562 | 1, 2 TF ChIP-seq |
| ENCFF529BDW | bed narrowPeak | SNIP1   | K562 | 1, 2 TF ChIP-seq |
| ENCFF206MJS | bed narrowPeak | SNRNP70 | K562 | 1, 2 TF ChIP-seq |
| ENCFF431STY | bed narrowPeak | SOX6    | K562 | 1, 2 TF ChIP-seq |
| ENCFF171NEU | bed narrowPeak | SP1     | K562 | 1, 2 TF ChIP-seq |
| ENCFF741FZG | bed narrowPeak | SP2     | K562 | 1, 2 TF ChIP-seq |
| ENCFF888CKG | bed narrowPeak | SPI1    | K562 | 1, 2 TF ChIP-seq |
| ENCFF777MYW | bed narrowPeak | SREBF1  | K562 | 1, 2 TF ChIP-seq |
| ENCFF710YFH | bed narrowPeak | SREBF2  | K562 | 1, 2 TF ChIP-seq |
| ENCFF087EVW | bed narrowPeak | SRF     | K562 | 1, 2 TF ChIP-seq |
| ENCFF792SXS | bed narrowPeak | SRSF1   | K562 | 1, 2 TF ChIP-seq |
| ENCFF926XGK | bed narrowPeak | SRSF3   | K562 | 1, 2 TF ChIP-seq |
| ENCFF550VUN | bed narrowPeak | SRSF7   | K562 | 1, 2 TF ChIP-seq |
| ENCFF217HAW | bed narrowPeak | SRSF9   | K562 | 1, 2 TF ChIP-seq |
| ENCFF921BXP | bed narrowPeak | STAG1   | K562 | 1, 2 TF ChIP-seq |
| ENCFF517IXK | bed narrowPeak | STAT5A  | K562 | 1, 2 TF ChIP-seq |
| ENCFF122FTW | bed narrowPeak | STAT5B  | K562 | 1, 2 TF ChIP-seq |
| ENCFF738XMN | bed narrowPeak | SUPT5H  | K562 | 1, 2 TF ChIP-seq |
| ENCFF889QYR | bed narrowPeak | SUZ12   | K562 | 1, 2 TF ChIP-seq |
| ENCFF784BTI | bed narrowPeak | TAF1    | K562 | 1, 2 TF ChIP-seq |
| ENCFF547PES | bed narrowPeak | TAF15   | K562 | 1, 2 TF ChIP-seq |
| ENCFF792CKI | bed narrowPeak | TAF7    | K562 | 1, 2 TF ChIP-seq |
| ENCFF223HDM | bed narrowPeak | TAF9B   | K562 | 1, 2 TF ChIP-seq |
| ENCFF852ZRK | bed narrowPeak | TAL1    | K562 | 1, 2 TF ChIP-seq |
| ENCFF448YOS | bed narrowPeak | TARDBP  | K562 | 1, 2 TF ChIP-seq |
| ENCFF868SWL | bed narrowPeak | TBL1XR1 | K562 | 1, 2 TF ChIP-seq |
| ENCFF370YGS | bed narrowPeak | TBP     | K562 | 1, 2 TF ChIP-seq |
| ENCFF927NEU | bed narrowPeak | TBPL1   | K562 | 1, 2 TF ChIP-seq |
| ENCFF405EGZ | bed narrowPeak | TBX18   | K562 | 1, 2 TF ChIP-seq |
| ENCFF912LXU | bed narrowPeak | TCF12   | K562 | 1, 2 TF ChIP-seq |
| ENCFF773RNU | bed narrowPeak | TCF3    | K562 | 1, 2 TF ChIP-seq |
| ENCFF512IAI | bed narrowPeak | TCF7    | K562 | 1, 2 TF ChIP-seq |
| ENCFF556FYF | bed narrowPeak | TCF7L2  | K562 | 1, 2 TF ChIP-seq |
| ENCFF692HUD | bed narrowPeak | TEAD1   | K562 | 1, 2 TF ChIP-seq |
| ENCFF563LGJ | bed narrowPeak | TEAD2   | K562 | 1, 2 TF ChIP-seq |
| ENCFF547MLB | bed narrowPeak | TEAD4   | K562 | 1, 2 TF ChIP-seq |
| ENCFF392MAR | bed narrowPeak | TFCP2   | K562 | 1, 2 TF ChIP-seq |
| ENCFF362JHQ | bed narrowPeak | TFDP1   | K562 | 1, 2 TF ChIP-seq |
| ENCFF592NJN | bed narrowPeak | TFE3    | K562 | 1, 2 TF ChIP-seq |
| ENCFF130TPD | bed narrowPeak | THAP1   | K562 | 1, 2 TF ChIP-seq |
| ENCFF206LMB | bed narrowPeak | THAP12  | K562 | 1, 2 TF ChIP-seq |
| ENCFF372YFU | bed narrowPeak | THAP7   | K562 | 1, 2 TF ChIP-seq |
| ENCFF309DMZ | bed narrowPeak | THRA    | K562 | 1, 2 TF ChIP-seq |

|             |                |         |      |                  |
|-------------|----------------|---------|------|------------------|
| ENCFF067FJF | bed narrowPeak | THRAP3  | K562 | 1, 2 TF ChIP-seq |
| ENCFF563WUP | bed narrowPeak | TOE1    | K562 | 1, 2 TF ChIP-seq |
| ENCFF063NXI | bed narrowPeak | TRIM24  | K562 | 1, 2 TF ChIP-seq |
| ENCFF514DDG | bed narrowPeak | TRIM25  | K562 | 1, 2 TF ChIP-seq |
| ENCFF634OOU | bed narrowPeak | TRIM28  | K562 | 1, 2 TF ChIP-seq |
| ENCFF534VQL | bed narrowPeak | TRIP13  | K562 | 1, 2 TF ChIP-seq |
| ENCFF265QXK | bed narrowPeak | TSC22D4 | K562 | 1, 2 TF ChIP-seq |
| ENCFF144ZLB | bed narrowPeak | TSHZ1   | K562 | 1, 2 TF ChIP-seq |
| ENCFF482DRO | bed narrowPeak | U2AF1   | K562 | 1, 2 TF ChIP-seq |
| ENCFF134HBP | bed narrowPeak | U2AF2   | K562 | 1, 2 TF ChIP-seq |
| ENCFF403TAF | bed narrowPeak | UBTF    | K562 | 1, 2 TF ChIP-seq |
| ENCFF310CCS | bed narrowPeak | USF1    | K562 | 1, 2 TF ChIP-seq |
| ENCFF289ZIR | bed narrowPeak | USF2    | K562 | 1, 2 TF ChIP-seq |
| ENCFF433ERT | bed narrowPeak | VEZF1   | K562 | 3, 4 TF ChIP-seq |
| ENCFF862UUR | bed narrowPeak | WHSC1   | K562 | 1 TF ChIP-seq    |
| ENCFF115PGE | bed narrowPeak | XRCC3   | K562 | 1, 2 TF ChIP-seq |
| ENCFF929TWP | bed narrowPeak | XRCC5   | K562 | 1, 2 TF ChIP-seq |
| ENCFF520DIY | bed narrowPeak | YBX1    | K562 | 1, 2 TF ChIP-seq |
| ENCFF508WCC | bed narrowPeak | YBX3    | K562 | 1, 2 TF ChIP-seq |
| ENCFF398UQZ | bed narrowPeak | YY1     | K562 | 1, 2 TF ChIP-seq |
| ENCFF388TYU | bed narrowPeak | ZBED1   | K562 | 1, 2 TF ChIP-seq |
| ENCFF554GSE | bed narrowPeak | ZBTB11  | K562 | 1, 2 TF ChIP-seq |
| ENCFF830MTX | bed narrowPeak | ZBTB12  | K562 | 1, 2 TF ChIP-seq |
| ENCFF292HSS | bed narrowPeak | ZBTB17  | K562 | 1, 2 TF ChIP-seq |
| ENCFF189WAO | bed narrowPeak | ZBTB2   | K562 | 1, 2 TF ChIP-seq |
| ENCFF146GZZ | bed narrowPeak | ZBTB33  | K562 | 1, 2 TF ChIP-seq |
| ENCFF624PTB | bed narrowPeak | ZBTB40  | K562 | 1, 2 TF ChIP-seq |
| ENCFF382IYX | bed narrowPeak | ZBTB5   | K562 | 1, 2 TF ChIP-seq |
| ENCFF245LRG | bed narrowPeak | ZBTB7A  | K562 | 1, 2 TF ChIP-seq |
| ENCFF328SSL | bed narrowPeak | ZBTB8A  | K562 | 1, 2 TF ChIP-seq |
| ENCFF588CXX | bed narrowPeak | ZBTB9   | K562 | 1, 2 TF ChIP-seq |
| ENCFF478PGJ | bed narrowPeak | ZC3H11A | K562 | 1, 2 TF ChIP-seq |
| ENCFF270TMW | bed narrowPeak | ZC3H4   | K562 | 1, 2 TF ChIP-seq |
| ENCFF045AOZ | bed narrowPeak | ZC3H8   | K562 | 1, 2 TF ChIP-seq |
| ENCFF808NWU | bed narrowPeak | ZEB2    | K562 | 1, 2 TF ChIP-seq |
| ENCFF795AWO | bed narrowPeak | ZFP1    | K562 | 1, 2 TF ChIP-seq |
| ENCFF839GAS | bed narrowPeak | ZFP36   | K562 | 1, 2 TF ChIP-seq |
| ENCFF150ZBH | bed narrowPeak | ZFP91   | K562 | 1, 2 TF ChIP-seq |
| ENCFF910JTR | bed narrowPeak | ZFX     | K562 | 1, 2 TF ChIP-seq |
| ENCFF495BPY | bed narrowPeak | ZHX1    | K562 | 1, 3 TF ChIP-seq |
| ENCFF560UGR | bed narrowPeak | ZKSCAN1 | K562 | 1, 2 TF ChIP-seq |
| ENCFF697DRN | bed narrowPeak | ZKSCAN3 | K562 | 1, 2 TF ChIP-seq |
| ENCFF908SNB | bed narrowPeak | ZKSCAN8 | K562 | 1, 2 TF ChIP-seq |
| ENCFF881DAT | bed narrowPeak | ZMIZ1   | K562 | 1, 2 TF ChIP-seq |
| ENCFF117XRE | bed narrowPeak | ZMYM3   | K562 | 1, 2 TF ChIP-seq |
| ENCFF021JCJ | bed narrowPeak | ZNF12   | K562 | 1, 2 TF ChIP-seq |
| ENCFF810OHB | bed narrowPeak | ZNF133  | K562 | 1, 2 TF ChIP-seq |
| ENCFF700GZI | bed narrowPeak | ZNF143  | K562 | 1, 2 TF ChIP-seq |
| ENCFF932FVX | bed narrowPeak | ZNF146  | K562 | 1 TF ChIP-seq    |
| ENCFF836QWY | bed narrowPeak | ZNF148  | K562 | 3, 4 TF ChIP-seq |
| ENCFF169QYL | bed narrowPeak | ZNF165  | K562 | 1, 2 TF ChIP-seq |
| ENCFF822FXR | bed narrowPeak | ZNF174  | K562 | 1, 2 TF ChIP-seq |

|             |                |         |      |                  |
|-------------|----------------|---------|------|------------------|
| ENCFF192MEM | bed narrowPeak | ZNF175  | K562 | 1, 2 TF ChIP-seq |
| ENCFF882XTP | bed narrowPeak | ZNF184  | K562 | 1, 2 TF ChIP-seq |
| ENCFF987UBO | bed narrowPeak | ZNF197  | K562 | 1, 2 TF ChIP-seq |
| ENCFF435MHH | bed narrowPeak | ZNF212  | K562 | 1, 2 TF ChIP-seq |
| ENCFF922RHM | bed narrowPeak | ZNF215  | K562 | 1, 2 TF ChIP-seq |
| ENCFF063VRD | bed narrowPeak | ZNF23   | K562 | 1, 2 TF ChIP-seq |
| ENCFF569TJP | bed narrowPeak | ZNF239  | K562 | 1, 2 TF ChIP-seq |
| ENCFF268YOM | bed narrowPeak | ZNF24   | K562 | 1, 2 TF ChIP-seq |
| ENCFF598QEL | bed narrowPeak | ZNF250  | K562 | 1, 2 TF ChIP-seq |
| ENCFF738IQL | bed narrowPeak | ZNF257  | K562 | 1, 2 TF ChIP-seq |
| ENCFF579ETM | bed narrowPeak | ZNF263  | K562 | 1, 2 TF ChIP-seq |
| ENCFF045CFL | bed narrowPeak | ZNF274  | K562 | 1, 2 TF ChIP-seq |
| ENCFF074WRG | bed narrowPeak | ZNF280A | K562 | 1, 2 TF ChIP-seq |
| ENCFF253UAF | bed narrowPeak | ZNF280B | K562 | 1, 2 TF ChIP-seq |
| ENCFF648ORA | bed narrowPeak | ZNF281  | K562 | 1, 2 TF ChIP-seq |
| ENCFF596JDS | bed narrowPeak | ZNF282  | K562 | 1, 2 TF ChIP-seq |
| ENCFF798AFV | bed narrowPeak | ZNF3    | K562 | 1, 2 TF ChIP-seq |
| ENCFF080KWE | bed narrowPeak | ZNF311  | K562 | 1, 2 TF ChIP-seq |
| ENCFF451AEQ | bed narrowPeak | ZNF316  | K562 | 1, 2 TF ChIP-seq |
| ENCFF577LQR | bed narrowPeak | ZNF318  | K562 | 1, 2 TF ChIP-seq |
| ENCFF873VFI | bed narrowPeak | ZNF319  | K562 | 1, 2 TF ChIP-seq |
| ENCFF265MQC | bed narrowPeak | ZNF324  | K562 | 1, 2 TF ChIP-seq |
| ENCFF843NBV | bed narrowPeak | ZNF347  | K562 | 1, 2 TF ChIP-seq |
| ENCFF712NHB | bed narrowPeak | ZNF354B | K562 | 1, 2 TF ChIP-seq |
| ENCFF864XZP | bed narrowPeak | ZNF384  | K562 | 1, 2 TF ChIP-seq |
| ENCFF275HDU | bed narrowPeak | ZNF395  | K562 | 1, 3 TF ChIP-seq |
| ENCFF193BGB | bed narrowPeak | ZNF397  | K562 | 1, 2 TF ChIP-seq |
| ENCFF538GSS | bed narrowPeak | ZNF407  | K562 | 1, 2 TF ChIP-seq |
| ENCFF207MLR | bed narrowPeak | ZNF408  | K562 | 1, 2 TF ChIP-seq |
| ENCFF318ZUN | bed narrowPeak | ZNF436  | K562 | 1, 2 TF ChIP-seq |
| ENCFF295XCB | bed narrowPeak | ZNF444  | K562 | 1, 2 TF ChIP-seq |
| ENCFF416TFM | bed narrowPeak | ZNF445  | K562 | 1, 2 TF ChIP-seq |
| ENCFF878SVX | bed narrowPeak | ZNF507  | K562 | 1, 2 TF ChIP-seq |
| ENCFF825ZIU | bed narrowPeak | ZNF512  | K562 | 1, 2 TF ChIP-seq |
| ENCFF096AYV | bed narrowPeak | ZNF518B | K562 | 1, 2 TF ChIP-seq |
| ENCFF913YMX | bed narrowPeak | ZNF551  | K562 | 1, 2 TF ChIP-seq |
| ENCFF945IST | bed narrowPeak | ZNF57   | K562 | 1, 2 TF ChIP-seq |
| ENCFF053ABJ | bed narrowPeak | ZNF583  | K562 | 1, 2 TF ChIP-seq |
| ENCFF005MBI | bed narrowPeak | ZNF584  | K562 | 1, 2 TF ChIP-seq |
| ENCFF345IHK | bed narrowPeak | ZNF589  | K562 | 1, 2 TF ChIP-seq |
| ENCFF847QJI | bed narrowPeak | ZNF592  | K562 | 1, 2 TF ChIP-seq |
| ENCFF017JQJ | bed narrowPeak | ZNF639  | K562 | 1, 2 TF ChIP-seq |
| ENCFF773XPT | bed narrowPeak | ZNF644  | K562 | 1, 2 TF ChIP-seq |
| ENCFF156EZP | bed narrowPeak | ZNF655  | K562 | 1, 2 TF ChIP-seq |
| ENCFF493LZB | bed narrowPeak | ZNF695  | K562 | 1, 2 TF ChIP-seq |
| ENCFF018HWM | bed narrowPeak | ZNF7    | K562 | 1, 2 TF ChIP-seq |
| ENCFF208OME | bed narrowPeak | ZNF700  | K562 | 1, 2 TF ChIP-seq |
| ENCFF159END | bed narrowPeak | ZNF717  | K562 | 1, 2 TF ChIP-seq |
| ENCFF219NIA | bed narrowPeak | ZNF740  | K562 | 1, 2 TF ChIP-seq |
| ENCFF307UZC | bed narrowPeak | ZNF75A  | K562 | 1, 2 TF ChIP-seq |
| ENCFF305XQM | bed narrowPeak | ZNF76   | K562 | 1, 2 TF ChIP-seq |
| ENCFF049MDN | bed narrowPeak | ZNF764  | K562 | 1, 2 TF ChIP-seq |



|             |                |         |       |                  |
|-------------|----------------|---------|-------|------------------|
| ENCFF168PYI | bed narrowPeak | ZNF766  | K562  | 1, 2 TF ChIP-seq |
| ENCFF809JNC | bed narrowPeak | ZNF77   | K562  | 1, 2 TF ChIP-seq |
| ENCFF165JQS | bed narrowPeak | ZNF778  | K562  | 1, 2 TF ChIP-seq |
| ENCFF794OSY | bed narrowPeak | ZNF780A | K562  | 1, 2 TF ChIP-seq |
| ENCFF352NGK | bed narrowPeak | ZNF785  | K562  | 1, 2 TF ChIP-seq |
| ENCFF670RLH | bed narrowPeak | ZNF79   | K562  | 1, 2 TF ChIP-seq |
| ENCFF791JWI | bed narrowPeak | ZNF83   | K562  | 1, 2 TF ChIP-seq |
| ENCFF150ZBY | bed narrowPeak | ZNF830  | K562  | 1, 2 TF ChIP-seq |
| ENCFF014HYS | bed narrowPeak | ZNF84   | K562  | 1, 2 TF ChIP-seq |
| ENCFF908ZLN | bed narrowPeak | ZSCAN29 | K562  | 1, 2 TF ChIP-seq |
| ENCFF537HHU | bed narrowPeak | ZSCAN32 | K562  | 1, 2 TF ChIP-seq |
| ENCFF945HJR | bed narrowPeak | ZZZ3    | K562  | 1, 2 TF ChIP-seq |
| ENCFF618NVV | bed narrowPeak | ARID3A  | MCF-7 | 1, 2 TF ChIP-seq |
| ENCFF760ZVI | bed narrowPeak | ATF7    | MCF-7 | 1, 2 TF ChIP-seq |
| ENCFF414LXZ | bed narrowPeak | BMI1    | MCF-7 | 1, 2 TF ChIP-seq |
| ENCFF740MEN | bed narrowPeak | BRCA2   | MCF-7 | 1, 2 TF ChIP-seq |
| ENCFF240ZHW | bed narrowPeak | CEBPB   | MCF-7 | 1, 2 TF ChIP-seq |
| ENCFF930PBH | bed narrowPeak | CEBPG   | MCF-7 | 1, 2 TF ChIP-seq |
| ENCFF730UAD | bed narrowPeak | CHD1    | MCF-7 | 1, 3 TF ChIP-seq |
| ENCFF025SMR | bed narrowPeak | CLOCK   | MCF-7 | 1, 2 TF ChIP-seq |
| ENCFF682WFF | bed narrowPeak | COPS2   | MCF-7 | 1, 2 TF ChIP-seq |
| ENCFF495PCJ | bed narrowPeak | CREB1   | MCF-7 | 1, 2 TF ChIP-seq |
| ENCFF982QZR | bed narrowPeak | CSDE1   | MCF-7 | 1, 2 TF ChIP-seq |
| ENCFF456MGR | bed narrowPeak | CTBP1   | MCF-7 | 1, 2 TF ChIP-seq |
| ENCFF785NTC | bed narrowPeak | CTCF    | MCF-7 | 1, 2 TF ChIP-seq |
| ENCFF762CDY | bed narrowPeak | CUX1    | MCF-7 | 2, 3 TF ChIP-seq |
| ENCFF089GNH | bed narrowPeak | DDX20   | MCF-7 | 1, 2 TF ChIP-seq |
| ENCFF042AWM | bed narrowPeak | DPF2    | MCF-7 | 1, 2 TF ChIP-seq |
| ENCFF115KRO | bed narrowPeak | E2F1    | MCF-7 | 1, 2 TF ChIP-seq |
| ENCFF090CEP | bed narrowPeak | E2F4    | MCF-7 | 1, 2 TF ChIP-seq |
| ENCFF072VGV | bed narrowPeak | E2F8    | MCF-7 | 1, 2 TF ChIP-seq |
| ENCFF347USC | bed narrowPeak | E4F1    | MCF-7 | 1, 2 TF ChIP-seq |
| ENCFF427RSA | bed narrowPeak | EGR1    | MCF-7 | 1, 2 TF ChIP-seq |
| ENCFF091NQE | bed narrowPeak | ELF1    | MCF-7 | 1, 2 TF ChIP-seq |
| ENCFF408TWW | bed narrowPeak | ELK1    | MCF-7 | 1, 3 TF ChIP-seq |
| ENCFF290DJX | bed narrowPeak | EP300   | MCF-7 | 1, 2 TF ChIP-seq |
| ENCFF541DRZ | bed narrowPeak | ESRRA   | MCF-7 | 1, 2 TF ChIP-seq |
| ENCFF170POB | bed narrowPeak | FOS     | MCF-7 | 1, 3 TF ChIP-seq |
| ENCFF423KOE | bed narrowPeak | FOSL2   | MCF-7 | 1, 2 TF ChIP-seq |
| ENCFF160RLI | bed narrowPeak | FOXA1   | MCF-7 | 1, 2 TF ChIP-seq |
| ENCFF899MQW | bed narrowPeak | FOXK2   | MCF-7 | 1, 2 TF ChIP-seq |
| ENCFF563MHZ | bed narrowPeak | FOXM1   | MCF-7 | 1, 2 TF ChIP-seq |
| ENCFF678DJM | bed narrowPeak | GABPA   | MCF-7 | 1, 2 TF ChIP-seq |
| ENCFF565QWY | bed narrowPeak | GATA3   | MCF-7 | 1, 2 TF ChIP-seq |
| ENCFF191SBE | bed narrowPeak | GATAD2B | MCF-7 | 1, 2 TF ChIP-seq |
| ENCFF343QQE | bed narrowPeak | GTF2F1  | MCF-7 | 1, 2 TF ChIP-seq |
| ENCFF401IAI | bed narrowPeak | HCFC1   | MCF-7 | 1, 3 TF ChIP-seq |
| ENCFF661VXV | bed narrowPeak | HDAC2   | MCF-7 | 1, 2 TF ChIP-seq |
| ENCFF161SFU | bed narrowPeak | HDGF    | MCF-7 | 1, 2 TF ChIP-seq |
| ENCFF144OPN | bed narrowPeak | HES1    | MCF-7 | 1, 2 TF ChIP-seq |
| ENCFF708ACK | bed narrowPeak | HSF1    | MCF-7 | 1, 2 TF ChIP-seq |
| ENCFF907UNK | bed narrowPeak | JUN     | MCF-7 | 1, 2 TF ChIP-seq |

|             |                |         |       |                  |
|-------------|----------------|---------|-------|------------------|
| ENCFF569ZCY | bed narrowPeak | JUND    | MCF-7 | 1, 2 TF ChIP-seq |
| ENCFF461CLM | bed narrowPeak | KLF4    | MCF-7 | 1, 2 TF ChIP-seq |
| ENCFF891BPE | bed narrowPeak | KLF9    | MCF-7 | 3, 4 TF ChIP-seq |
| ENCFF736DZL | bed narrowPeak | LARP7   | MCF-7 | 1, 2 TF ChIP-seq |
| ENCFF873SVI | bed narrowPeak | MAFK    | MCF-7 | 1, 2 TF ChIP-seq |
| ENCFF624CRN | bed narrowPeak | MAX     | MCF-7 | 1, 2 TF ChIP-seq |
| ENCFF666YGQ | bed narrowPeak | MAZ     | MCF-7 | 1, 2 TF ChIP-seq |
| ENCFF464QAL | bed narrowPeak | MBD2    | MCF-7 | 1, 2 TF ChIP-seq |
| ENCFF578NMM | bed narrowPeak | MLLT1   | MCF-7 | 1, 2 TF ChIP-seq |
| ENCFF432GSK | bed narrowPeak | MNT     | MCF-7 | 1, 2 TF ChIP-seq |
| ENCFF283FBB | bed narrowPeak | MSX2    | MCF-7 | 1, 2 TF ChIP-seq |
| ENCFF225VFR | bed narrowPeak | MTA1    | MCF-7 | 1, 2 TF ChIP-seq |
| ENCFF180XXZ | bed narrowPeak | MTA2    | MCF-7 | 1, 2 TF ChIP-seq |
| ENCFF083AZM | bed narrowPeak | MTA3    | MCF-7 | 1, 2 TF ChIP-seq |
| ENCFF370EQJ | bed narrowPeak | MYC     | MCF-7 | 1, 2 TF ChIP-seq |
| ENCFF209WRW | bed narrowPeak | NBN     | MCF-7 | 1, 2 TF ChIP-seq |
| ENCFF320TAN | bed narrowPeak | NCOA3   | MCF-7 | 1, 2 TF ChIP-seq |
| ENCFF059LJD | bed narrowPeak | NEUROD1 | MCF-7 | 1, 2 TF ChIP-seq |
| ENCFF519XTN | bed narrowPeak | NFIB    | MCF-7 | 1, 2 TF ChIP-seq |
| ENCFF895MJB | bed narrowPeak | NFRKB   | MCF-7 | 1, 2 TF ChIP-seq |
| ENCFF927DIO | bed narrowPeak | NFXL1   | MCF-7 | 1, 2 TF ChIP-seq |
| ENCFF800CDQ | bed narrowPeak | NONO    | MCF-7 | 1, 2 TF ChIP-seq |
| ENCFF386FQQ | bed narrowPeak | NR2F2   | MCF-7 | 1, 2 TF ChIP-seq |
| ENCFF269RME | bed narrowPeak | NRF1    | MCF-7 | 1, 3 TF ChIP-seq |
| ENCFF024BHX | bed narrowPeak | OVOL1   | MCF-7 | 1, 2 TF ChIP-seq |
| ENCFF473UHQ | bed narrowPeak | PAX8    | MCF-7 | 1, 2 TF ChIP-seq |
| ENCFF105PFS | bed narrowPeak | PKNOX1  | MCF-7 | 1, 2 TF ChIP-seq |
| ENCFF569JWM | bed narrowPeak | PML     | MCF-7 | 1, 2 TF ChIP-seq |
| ENCFF456FTV | bed narrowPeak | POLR2A  | MCF-7 | 1, 2 TF ChIP-seq |
| ENCFF508JRB | bed narrowPeak | PPP1R10 | MCF-7 | 1, 2 TF ChIP-seq |
| ENCFF682UUL | bed narrowPeak | RAD21   | MCF-7 | 1, 2 TF ChIP-seq |
| ENCFF091AYX | bed narrowPeak | RAD51   | MCF-7 | 1, 2 TF ChIP-seq |
| ENCFF838LXI | bed narrowPeak | RCOR1   | MCF-7 | 3, 4 TF ChIP-seq |
| ENCFF680JMZ | bed narrowPeak | REST    | MCF-7 | 1, 2 TF ChIP-seq |
| ENCFF150PTQ | bed narrowPeak | RFX1    | MCF-7 | 1, 3 TF ChIP-seq |
| ENCFF103MPW | bed narrowPeak | RFX5    | MCF-7 | 1, 2 TF ChIP-seq |
| ENCFF803WYI | bed narrowPeak | SIN3A   | MCF-7 | 1, 2 TF ChIP-seq |
| ENCFF441UHA | bed narrowPeak | SIX4    | MCF-7 | 1, 2 TF ChIP-seq |
| ENCFF618JNX | bed narrowPeak | SMARCA5 | MCF-7 | 1, 2 TF ChIP-seq |
| ENCFF761NKP | bed narrowPeak | SMARCE1 | MCF-7 | 1, 2 TF ChIP-seq |
| ENCFF455HWV | bed narrowPeak | SNIP1   | MCF-7 | 1, 2 TF ChIP-seq |
| ENCFF577EMC | bed narrowPeak | SP1     | MCF-7 | 1, 2 TF ChIP-seq |
| ENCFF464GFC | bed narrowPeak | SPDEF   | MCF-7 | 1, 2 TF ChIP-seq |
| ENCFF275WAD | bed narrowPeak | SREBF1  | MCF-7 | 1, 2 TF ChIP-seq |
| ENCFF131TYZ | bed narrowPeak | SRF     | MCF-7 | 1, 2 TF ChIP-seq |
| ENCFF258ZVN | bed narrowPeak | SUZ12   | MCF-7 | 1, 2 TF ChIP-seq |
| ENCFF075TIU | bed narrowPeak | TAF1    | MCF-7 | 1, 2 TF ChIP-seq |
| ENCFF233RBO | bed narrowPeak | TARDBP  | MCF-7 | 1, 2 TF ChIP-seq |
| ENCFF987QLI | bed narrowPeak | TCF12   | MCF-7 | 1, 2 TF ChIP-seq |
| ENCFF332AZX | bed narrowPeak | TCF7L2  | MCF-7 | 1, 2 TF ChIP-seq |
| ENCFF144VMM | bed narrowPeak | TOE1    | MCF-7 | 1, 2 TF ChIP-seq |
| ENCFF452VLA | bed narrowPeak | TRIM22  | MCF-7 | 1, 3 TF ChIP-seq |

|             |                |         |       |                  |
|-------------|----------------|---------|-------|------------------|
| ENCFF247VVK | bed narrowPeak | YBX1    | MCF-7 | 1, 2 TF ChIP-seq |
| ENCFF589MVU | bed narrowPeak | ZBTB1   | MCF-7 | 1, 2 TF ChIP-seq |
| ENCFF496RVC | bed narrowPeak | ZBTB11  | MCF-7 | 1, 2 TF ChIP-seq |
| ENCFF780WLS | bed narrowPeak | ZBTB33  | MCF-7 | 1, 2 TF ChIP-seq |
| ENCFF932XEU | bed narrowPeak | ZBTB40  | MCF-7 | 1, 2 TF ChIP-seq |
| ENCFF794UEM | bed narrowPeak | ZBTB7B  | MCF-7 | 1, 2 TF ChIP-seq |
| ENCFF775BWJ | bed narrowPeak | ZFX     | MCF-7 | 1, 2 TF ChIP-seq |
| ENCFF694ZRC | bed narrowPeak | ZHX2    | MCF-7 | 1, 2 TF ChIP-seq |
| ENCFF687REM | bed narrowPeak | ZKSCAN1 | MCF-7 | 3, 4 TF ChIP-seq |
| ENCFF621ZSK | bed narrowPeak | ZNF207  | MCF-7 | 1, 2 TF ChIP-seq |
| ENCFF083LCM | bed narrowPeak | ZNF217  | MCF-7 | 1, 2 TF ChIP-seq |
| ENCFF699IZY | bed narrowPeak | ZNF227  | MCF-7 | 2, 3 TF ChIP-seq |
| ENCFF619BFO | bed narrowPeak | ZNF24   | MCF-7 | 1, 2 TF ChIP-seq |
| ENCFF611WRQ | bed narrowPeak | ZNF331  | MCF-7 | 1, 2 TF ChIP-seq |
| ENCFF786XJV | bed narrowPeak | ZNF444  | MCF-7 | 1, 2 TF ChIP-seq |
| ENCFF675SAG | bed narrowPeak | ZNF507  | MCF-7 | 1, 2 TF ChIP-seq |
| ENCFF414EYO | bed narrowPeak | ZNF512B | MCF-7 | 1, 2 TF ChIP-seq |
| ENCFF290LSS | bed narrowPeak | ZNF574  | MCF-7 | 1, 2 TF ChIP-seq |
| ENCFF306PBX | bed narrowPeak | ZNF579  | MCF-7 | 1, 2 TF ChIP-seq |
| ENCFF541HRT | bed narrowPeak | ZNF592  | MCF-7 | 1, 2 TF ChIP-seq |
| ENCFF329QYZ | bed narrowPeak | ZNF687  | MCF-7 | 1, 2 TF ChIP-seq |
| ENCFF525RRP | bed narrowPeak | ZNF8    | MCF-7 | 1, 2 TF ChIP-seq |
