# Supplementary material for: TF-COMB – Discovering grammar of transcription factor binding sites
Source: PubMed Central journal article supplement — Comput Struct Biotechnol J. 2022 Jul 21;20:4040–51. doi: 10.1016/j.csbj.2022.07.025 (PMC9358416; doi:10.1016/j.csbj.2022.07.025), 2022-07-21
Supplement: mmc3.pdf [file mmc3.pdf]

**Supplementary Table 2:**  
**Overview on TF co-occurrence tools and evaluation on comparability**

| <b>Tool name</b> | <b>Maintained</b> | <b>Chosen for comparison</b> | <b>Year</b> | <b>Last updated</b> | <b>Source</b> | <b>Note</b>                           |
|------------------|-------------------|------------------------------|-------------|---------------------|---------------|---------------------------------------|
| coTRaCTE         | yes               | no                           | 2018        | -                   | [1]           | Precalculated data needed             |
| PC-TraFF         | yes               | no                           | 2015        | -                   | [2]           | Predefined motifs only                |
| TACO             | yes               | no                           | 2014        | 2016                | [3]           | Replicated data needed                |
| CIS Miner        | no                | no                           | 2014        | 2016                | [4]           | No input example                      |
| INSECT 2.0       | yes               | no                           | 2015        | 2015                | [5]           | Disregarded ( too different approach) |
| SpaMo            | yes               | yes                          | 2012        | 2021                | [6]           | <b>Comparable</b>                     |
| iTFs             | no                | no                           | 2013        | -                   | [7]           | Link not reachable                    |
| COPS             | no                | no                           | 2012        | 2012                | [8]           | Limited to Drosophila & Mus musculus  |
| CENDIST          | no                | no                           | 2011        | -                   | [9]           | Link not reachable                    |
| TICA             | no                | no                           | 2018        | -                   | [10]          | Link not reachable                    |
| Nautica          | no                | no                           | 2020        | -                   | [11]          | Link not reachable                    |
| MCOT             | yes               | yes                          | 2019        | 2021                | [12]          | <b>Comparable</b>                     |

**Supplementary Table 3:**  
**Feature comparison of MCOT, SPAMO and TF-COMB**

| Tool name                                | MCOT                                                                          | SPAMO                      | TF-COMB                                                  |
|------------------------------------------|-------------------------------------------------------------------------------|----------------------------|----------------------------------------------------------|
| <b>Overview</b>                          |                                                                               |                            |                                                          |
| Input                                    | ChIP-seq; Anchor motif;<br>Partner motif(s);                                  | ChIP-seq; Meme motifs      | ChIP-seq; Meme motifs;<br>Peaks with regions of interest |
| Type                                     | One-against-all                                                               | One-against-all            | All-against-all                                          |
| ChIP-seq mandatory                       | Yes                                                                           | Yes                        | No                                                       |
| Genome reference free                    | No                                                                            | Yes                        | Yes                                                      |
| Programming language                     | C++                                                                           | C                          | Python, Cython                                           |
| Output                                   | plethora of result files<br>(intermediate files, different files for metrics) | .html summary, result .tsv | result tsv, optional plots                               |
| <b>Features</b>                          |                                                                               |                            |                                                          |
| Scoring                                  | Yes                                                                           | Yes                        | Yes                                                      |
| Differential analysis                    | No                                                                            | No                         | Yes                                                      |
| Finding Hubs                             | No                                                                            | No                         | Yes                                                      |
| Preferred Distance analysis              | No                                                                            | (Yes)                      | Yes                                                      |
| Dynamic parameters for distance analysis | (Yes)                                                                         | No                         | Yes                                                      |
| Orientation analysis                     | forced                                                                        | forced                     | optional                                                 |
| Anchor free motif prediction             | No                                                                            | No                         | Yes                                                      |
| Deriving networks                        | No                                                                            | No                         | Yes                                                      |
| Network clustering                       | No                                                                            | No                         | Yes                                                      |
| Overlapping motifs                       | Yes                                                                           | No                         | Yes                                                      |
| <b>Plotting</b>                          |                                                                               |                            |                                                          |
| Weighted networks                        | No                                                                            | No                         | Yes                                                      |
| Network substructures                    | No                                                                            | No                         | Yes                                                      |
| Preferred spacing                        | No                                                                            | Yes                        | Yes                                                      |
| Paired footprint visualization           | No                                                                            | No                         | Yes                                                      |

## Supplementary Table 4:

### Literature search for top 10 exclusively found pairs for MCOT, SPAMO and TF-COMB

| Mcot Only                                                                                                                                |         |                | weak evidence   |
|------------------------------------------------------------------------------------------------------------------------------------------|---------|----------------|-----------------|
| Anchor                                                                                                                                   | Partner | Sources        | no evidence     |
| ATF2                                                                                                                                     | SREBF2  | [13]           | strong evidence |
| NR2C1                                                                                                                                    | ESRRA   | -              |                 |
| MEF2A                                                                                                                                    | SMAD5   | [14]           |                 |
| SMAD5                                                                                                                                    | MEF2B   | [14]           |                 |
| BHLHE40                                                                                                                                  | MYC     | [15]           |                 |
| SPI1                                                                                                                                     | ETS1    | [16]           |                 |
| NR2F1                                                                                                                                    | USF1    | -              |                 |
| STAT3                                                                                                                                    | STAT5A  | [17]           |                 |
| USF2                                                                                                                                     | SREBF1  | [18]           |                 |
| STAT3                                                                                                                                    | STAT1   | [16]           |                 |
|                                                                                                                                          |         |                |                 |
| Spamo Only                                                                                                                               |         |                |                 |
| Anchor                                                                                                                                   | Partner | Sources        |                 |
| MEF2C                                                                                                                                    | PBX3    | [18]           |                 |
| PAX5                                                                                                                                     | ZNF384  | -              |                 |
| ZNF384                                                                                                                                   | PBX3    | -              |                 |
| NFYB                                                                                                                                     | MXI1    |                |                 |
| MEF2C                                                                                                                                    | EGR1    | -              |                 |
| NFYB                                                                                                                                     | MAX     | [19]           |                 |
| NFIC                                                                                                                                     | ZNF384  | -              |                 |
| PBX3                                                                                                                                     | CEBPB   | -              |                 |
| PAX5                                                                                                                                     | CEBPB   | -              |                 |
| ZNF384                                                                                                                                   | MAZ     | -              |                 |
|                                                                                                                                          |         |                |                 |
| TF-COMB Only                                                                                                                             |         |                |                 |
| Anchor                                                                                                                                   | Partner | Sources        |                 |
| JUNB                                                                                                                                     | BATF    | [20],[21],[22] |                 |
| JUNB                                                                                                                                     | NFIC    | [23]           |                 |
| NFATC3                                                                                                                                   | TBX21   | [24]           |                 |
| IRF4                                                                                                                                     | CREM    | [25]           |                 |
| JUNB                                                                                                                                     | ATF2    | [26]           |                 |
| NFIC                                                                                                                                     | BATF    | *              |                 |
| MEF2B                                                                                                                                    | EBF1    | [27]           |                 |
| CREM                                                                                                                                     | ETV6    | -              |                 |
| JUNB                                                                                                                                     | IRF4    | [20]           |                 |
| SP1                                                                                                                                      | CREM    | [16]**         |                 |
| * We found the pairs NFIC-JUNB and JUNB-BATF (top2) with strong evidence. This hints on a connection between BATF-NFIC connected by JUNB |         |                |                 |
| ** Only reported in <i>C. familiaris</i> (BioGrid)                                                                                       |         |                |                 |

## References for Supplementary Tables 2 and 4

1. van Bommel, A., et al., *coTRaCTE predicts co-occurring transcription factors within cell-type specific enhancers*. PLoS Comput Biol, 2018. **14**(8): p. e1006372.
2. Meckbach, C., et al., *PC-TraFF: identification of potentially collaborating transcription factors using pointwise mutual information*. BMC Bioinformatics, 2015. **16**: p. 400.
3. Jankowski, A., S. Prabhakar, and J. Tiurny, *TACO: a general-purpose tool for predicting cell-type-specific transcription factor dimers*. BMC Genomics, 2014. **15**(208).
4. Navarro, C., et al., *CisMiner: genome-wide in-silico cis-regulatory module prediction by fuzzy itemset mining*. PLoS One, 2014. **9**(9): p. e108065.
5. Parra, R.G., et al., *INSECT 2.0: a web-server for genome-wide cis-regulatory modules prediction*. Bioinformatics, 2016. **32**(8): p. 1229-31.
6. Whittington, T., et al., *Inferring transcription factor complexes from ChIP-seq data*. Nucleic Acids Res, 2011. **39**(15): p. e98.
7. Kazemian, M., et al., *Widespread evidence of cooperative DNA binding by transcription factors in Drosophila development*. Nucleic Acids Res, 2013. **41**(17): p. 8237-52.
8. Ha, N., M. Polychronidou, and I. Lohmann, *COPS: detecting co-occurrence and spatial arrangement of transcription factor binding motifs in genome-wide datasets*. PLoS One, 2012. **7**(12): p. e52055.
9. Zhang, Z., et al., *CENTDIST: discovery of co-associated factors by motif distribution*. Nucleic Acids Res, 2011. **39**(Web Server issue): p. W391-9.
10. Perna, S., et al., *TICA: Transcriptional Interaction and Coregulation Analyzer*. Genomics, Proteomics & Bioinformatics, 2018. **16**(5): p. 342-353.
11. Perna, S., et al., *NAUTICA: classifying transcription factor interactions by positional and protein-protein interaction information*. Biol Direct, 2020. **15**(1): p. 13.
12. Levitsky, V., et al., *A single ChIP-seq dataset is sufficient for comprehensive analysis of motifs co-occurrence with MCOT package*. Nucleic Acids Res, 2019. **47**(21): p. e139.
13. Inoue, K. and Y. Imai, *Identification of novel transcription factors in osteoclast differentiation using genome-wide analysis of open chromatin determined by DNase-seq*. J Bone Miner Res, 2014. **29**(8): p. 1823-32.
14. Quinn, Z.A., et al., *Smad proteins function as co-modulators for MEF2 transcriptional regulatory proteins*. Nucleic Acids Research, 2001. **29**(3): p. 732–742.
15. Miao, T., et al., *Egr2 and 3 control adaptive immune responses by temporally uncoupling expansion from T cell differentiation*. J Exp Med, 2017. **214**(6): p. 1787-1808.
16. Oughtred, R., et al., *The BioGRID database: A comprehensive biomedical resource of curated protein, genetic, and chemical interactions*. Protein science : a publication of the Protein Society, 2021. **30**(1): p. 187-200.
17. Wingelhofer, B., et al., *Implications of STAT3 and STAT5 signaling on gene regulation and chromatin remodeling in hematopoietic cancer*. Leukemia, 2018. **32**(8): p. 1713-1726.
18. Rahman, M.H., et al., *A Network-Based Bioinformatics Approach to Identify Molecular Biomarkers for Type 2 Diabetes that Are Linked to the Progression of Neurological Diseases*. Int J Environ Res Public Health, 2020. **17**(3).
19. Li, J., et al., *The expression profile analysis of NKX2-5 knock-out embryonic mice to explore the pathogenesis of congenital heart disease*. J Cardiol, 2015. **66**(6): p. 527-31.
20. Li, P., et al., *BATF-JUN is critical for IRF4-mediated transcription in T cells*. Nature, 2012. **490**(7421): p. 543-6.
21. Chinenov, Y. and T.K. Kerppola, *Close encounters of many kinds: Fos-Jun interactions that mediate*

- transcription regulatory specificity*. *Oncogene*, 2001. **20**: p. 2438–2452.
22. Murphy, T.L., R. Tussiwand, and K.M. Murphy, *Specificity through cooperation: BATF-IRF interactions control immune-regulatory networks*. *Nat Rev Immunol*, 2013. **13**(7): p. 499-509.
  23. Li, W., et al., *Identification of Yin Yang 1-interacting partners at -1026C/A in the human iNOS promoter*. *Arch Biochem Biophys*, 2010. **498**(2): p. 119-26.
  24. Hermann-Kleiter, N. and G. Baier, *NFAT pulls the strings during CD4+ T helper cell effector functions*. *Blood*, 2010. **115**(15): p. 2989-97.
  25. van der Stoep, N., et al., *E47, IRF-4, and PU.1 synergize to induce B-cell-specific activation of the class II transactivator promoter III (CIITA-PIII)*. *Blood*, 2004. **104**(9): p. 2849-57.
  26. Szklarczyk, D., et al., *STRING v11: protein-protein association networks with increased coverage, supporting functional discovery in genome-wide experimental datasets*. *Nucleic Acids Res*, 2019. **47**(D1): p. D607-D613.
  27. Tempera, I., et al., *Identification of MEF2B, EBF1, and IL6R as Direct Gene Targets of Epstein-Barr Virus (EBV) Nuclear Antigen 1 Critical for EBV-Infected B-Lymphocyte Survival*. *J Virol*, 2016. **90**(1): p. 345-55.
