# Supplementary material for: TF-COMB – Discovering grammar of transcription factor binding sites
Source: PubMed Central journal article supplement — Comput Struct Biotechnol J. 2022 Jul 21;20:4040–51. doi: 10.1016/j.csbj.2022.07.025 (PMC9358416; doi:10.1016/j.csbj.2022.07.025), 2022-07-21
Supplement: mmc4.pdf [file mmc4.pdf]

## Supplementary Table 5:

### Results of co-occurrence of ChIP-seq peaks across cell lines

| TF1    | TF2    | TF1_TF2_count | TF1_count | TF2_count | cosine | zscore  | cell_line |
|--------|--------|---------------|-----------|-----------|--------|---------|-----------|
| FOSL2  | JUNB   | 14274         | 43162     | 20675     | 0.478  | 90.383  | A549      |
| GATA3  | JUNB   | 10288         | 23062     | 20675     | 0.471  | 115.365 | A549      |
| E2F6   | MAX    | 12050         | 18250     | 43738     | 0.427  | 84.097  | A549      |
| JUN    | MAX    | 17173         | 39252     | 43738     | 0.414  | 51.693  | A549      |
| GATA3  | TEAD4  | 7251          | 23062     | 14330     | 0.399  | 111.333 | A549      |
| FOSL2  | GATA3  | 12237         | 43162     | 23062     | 0.388  | 60.506  | A549      |
| FOSB   | HOXA7  | 2719          | 6489      | 7586      | 0.388  | 129.043 | A549      |
| EHF    | HOXB13 | 2725          | 6247      | 8237      | 0.380  | 140.920 | A549      |
| ATOH8  | HOXB13 | 2816          | 7005      | 8237      | 0.371  | 114.163 | A549      |
| NR2E3  | TP53   | 2642          | 8105      | 6281      | 0.370  | 120.110 | A549      |
| ATOH8  | HOXB5  | 3177          | 7005      | 10516     | 0.370  | 133.932 | A549      |
| GATA3  | JUN    | 11011         | 23062     | 39252     | 0.366  | 57.757  | A549      |
| HOXB13 | HOXB5  | 3360          | 8237      | 10516     | 0.361  | 152.978 | A549      |
| ATOH8  | EHF    | 2373          | 7005      | 6247      | 0.359  | 128.919 | A549      |
| EHF    | HOXB5  | 2785          | 6247      | 10516     | 0.344  | 120.340 | A549      |
| JUNB   | TEAD4  | 5741          | 20675     | 14330     | 0.334  | 84.682  | A549      |
| EHF    | ZNF302 | 1388          | 6247      | 2822      | 0.331  | 117.198 | A549      |
| MAX    | MYC    | 6673          | 43738     | 9501      | 0.327  | 68.723  | A549      |
| FOXF2  | FOXS1  | 2082          | 9371      | 4405      | 0.324  | 110.059 | A549      |
| EHF    | FOXS1  | 1685          | 6247      | 4405      | 0.321  | 115.844 | A549      |
| JUN    | JUNB   | 8945          | 39252     | 20675     | 0.314  | 57.775  | A549      |
| HES2   | JUNB   | 2858          | 4245      | 20675     | 0.305  | 114.575 | A549      |
| HOXB13 | ZNF302 | 1467          | 8237      | 2822      | 0.304  | 99.763  | A549      |
| ATOH8  | FOXS1  | 1680          | 7005      | 4405      | 0.302  | 118.804 | A549      |
| IKZF1  | IKZF2  | 41044         | 69901     | 53515     | 0.671  | 50.628  | GM12878   |
| BATF   | JUNB   | 22204         | 36828     | 34714     | 0.621  | 101.763 | GM12878   |
| CTCF   | ZNF143 | 27606         | 51248     | 42469     | 0.592  | 63.633  | GM12878   |
| CREB1  | CREM   | 18020         | 28275     | 33311     | 0.587  | 104.822 | GM12878   |
| FOS    | NFYA   | 893           | 2042      | 1141      | 0.585  | 215.378 | GM12878   |
| USF1   | USF2   | 4570          | 8460      | 7690      | 0.567  | 188.573 | GM12878   |
| MEF2A  | MEF2C  | 8899          | 22587     | 11826     | 0.544  | 173.504 | GM12878   |
| ATF2   | NFIC   | 18466         | 30795     | 38532     | 0.536  | 83.961  | GM12878   |
| TCF12  | TCF3   | 11380         | 25135     | 18871     | 0.523  | 132.995 | GM12878   |
| BCL11A | IRF4   | 11306         | 21231     | 23042     | 0.511  | 119.652 | GM12878   |
| ATF2   | CREM   | 15774         | 30795     | 33311     | 0.493  | 77.627  | GM12878   |
| FOXM1  | NFIC   | 14109         | 22379     | 38532     | 0.480  | 77.692  | GM12878   |
| BATF   | BCL11A | 13347         | 36828     | 21231     | 0.477  | 85.542  | GM12878   |
| BATF   | IRF4   | 13893         | 36828     | 23042     | 0.477  | 85.525  | GM12878   |
| JUNB   | NFIC   | 17258         | 34714     | 38532     | 0.472  | 56.653  | GM12878   |
| ATF2   | BCL11A | 12031         | 30795     | 21231     | 0.471  | 81.716  | GM12878   |
| ATF2   | FOXM1  | 12275         | 30795     | 22379     | 0.468  | 93.800  | GM12878   |
| NFATC3 | TBX21  | 15597         | 25994     | 43559     | 0.464  | 60.361  | GM12878   |
| FOS    | IRF3   | 1430          | 2042      | 4772      | 0.458  | 147.571 | GM12878   |
| ATF2   | MEF2A  | 12064         | 30795     | 22587     | 0.457  | 85.072  | GM12878   |
| BCL11A | NFIC   | 13057         | 21231     | 38532     | 0.457  | 69.868  | GM12878   |
| CREM   | NFIC   | 16262         | 33311     | 38532     | 0.454  | 58.064  | GM12878   |

|         |        |       |       |       |       |         |         |
|---------|--------|-------|-------|-------|-------|---------|---------|
| BCL11A  | CREM   | 11958 | 21231 | 33311 | 0.450 | 88.028  | GM12878 |
| NFATC3  | RELB   | 15879 | 25994 | 48090 | 0.449 | 60.897  | GM12878 |
| MEF2A   | NFIC   | 13234 | 22587 | 38532 | 0.449 | 58.780  | GM12878 |
| BCL11A  | PAX5   | 10180 | 21231 | 24348 | 0.448 | 88.344  | GM12878 |
| MAX     | MXI1   | 9231  | 18647 | 22963 | 0.446 | 100.319 | GM12878 |
| ATF2    | IRF4   | 11834 | 30795 | 23042 | 0.444 | 93.399  | GM12878 |
| ATF7    | NFATC3 | 14894 | 44211 | 25994 | 0.439 | 54.479  | GM12878 |
| CREM    | IRF4   | 11950 | 33311 | 23042 | 0.431 | 71.023  | GM12878 |
| NFATC3  | SKIL   | 11116 | 25994 | 25597 | 0.431 | 78.641  | GM12878 |
| ATF2    | JUNB   | 14059 | 30795 | 34714 | 0.430 | 53.038  | GM12878 |
| FOXM1   | MEF2A  | 9662  | 22379 | 22587 | 0.430 | 82.026  | GM12878 |
| BCL11A  | FOXM1  | 9345  | 21231 | 22379 | 0.429 | 90.880  | GM12878 |
| BCL11A  | JUNB   | 11626 | 21231 | 34714 | 0.428 | 89.335  | GM12878 |
| BCL11A  | MEF2A  | 9326  | 21231 | 22587 | 0.426 | 91.259  | GM12878 |
| CREM    | MEF2A  | 11547 | 33311 | 22587 | 0.421 | 73.078  | GM12878 |
| BCL11A  | IKZF2  | 14121 | 21231 | 53515 | 0.419 | 50.507  | GM12878 |
| IRF4    | JUNB   | 11848 | 23042 | 34714 | 0.419 | 54.249  | GM12878 |
| ETV6    | NFIC   | 12204 | 22142 | 38532 | 0.418 | 69.087  | GM12878 |
| SKIL    | TBX21  | 13911 | 25597 | 43559 | 0.417 | 55.436  | GM12878 |
| CREM    | ETV6   | 11210 | 33311 | 22142 | 0.413 | 75.251  | GM12878 |
| ATF2    | ETV6   | 10758 | 30795 | 22142 | 0.412 | 53.301  | GM12878 |
| IRF4    | NFIC   | 12259 | 23042 | 38532 | 0.411 | 62.798  | GM12878 |
| BCL11A  | ETV6   | 8918  | 21231 | 22142 | 0.411 | 92.463  | GM12878 |
| BCL11A  | TBX21  | 12501 | 21231 | 43559 | 0.411 | 60.838  | GM12878 |
| CREM    | SP1    | 9330  | 33311 | 15591 | 0.409 | 71.293  | GM12878 |
| PBX3    | PKNOX1 | 8759  | 12586 | 36603 | 0.408 | 85.282  | GM12878 |
| CREM    | PAX5   | 11621 | 33311 | 24348 | 0.408 | 50.252  | GM12878 |
| CREM    | FOXM1  | 11137 | 33311 | 22379 | 0.408 | 63.742  | GM12878 |
| ARNT    | NFATC3 | 9556  | 21468 | 25994 | 0.405 | 81.866  | GM12878 |
| BCL11A  | NFATC3 | 9438  | 21231 | 25994 | 0.402 | 85.135  | GM12878 |
| ETV6    | IRF4   | 9017  | 22142 | 23042 | 0.399 | 92.367  | GM12878 |
| IRF4    | PAX5   | 9445  | 23042 | 24348 | 0.399 | 62.505  | GM12878 |
| CREB1   | SP1    | 8334  | 28275 | 15591 | 0.397 | 84.781  | GM12878 |
| PAX5    | TCF12  | 9819  | 24348 | 25135 | 0.397 | 69.445  | GM12878 |
| ATF2    | CREB1  | 11705 | 30795 | 28275 | 0.397 | 58.372  | GM12878 |
| ARNT    | SKIL   | 9262  | 21468 | 25597 | 0.395 | 69.879  | GM12878 |
| ATF3    | USF2   | 2196  | 4023  | 7690  | 0.395 | 141.728 | GM12878 |
| FOXM1   | JUNB   | 10847 | 22379 | 34714 | 0.389 | 65.906  | GM12878 |
| FOXM1   | IRF4   | 8836  | 22379 | 23042 | 0.389 | 72.260  | GM12878 |
| ATF3    | USF1   | 2264  | 4023  | 8460  | 0.388 | 123.052 | GM12878 |
| IRF3    | NFYA   | 900   | 4772  | 1141  | 0.386 | 116.270 | GM12878 |
| ATF2    | NFATC3 | 10879 | 30795 | 25994 | 0.385 | 51.135  | GM12878 |
| BCL11A  | SKIL   | 8951  | 21231 | 25597 | 0.384 | 74.381  | GM12878 |
| CREM    | GABPA  | 8220  | 33311 | 13947 | 0.381 | 71.965  | GM12878 |
| ETS1    | SIX5   | 3200  | 12891 | 5476  | 0.381 | 137.331 | GM12878 |
| IRF4    | MEF2A  | 8688  | 23042 | 22587 | 0.381 | 83.756  | GM12878 |
| ELF1    | ETS1   | 7124  | 27368 | 12891 | 0.379 | 82.845  | GM12878 |
| ATF2    | ZBED1  | 7953  | 30795 | 14421 | 0.377 | 71.244  | GM12878 |
| BHLHE40 | PAX5   | 9955  | 28650 | 24348 | 0.377 | 60.443  | GM12878 |
| PAX5    | POU2F2 | 9828  | 24348 | 27931 | 0.377 | 55.202  | GM12878 |
| PAX5    | SP1    | 7332  | 24348 | 15591 | 0.376 | 86.380  | GM12878 |
| JUNB    | MEF2A  | 10485 | 34714 | 22587 | 0.374 | 56.027  | GM12878 |

|         |         |       |       |       |       |         |         |
|---------|---------|-------|-------|-------|-------|---------|---------|
| ATF2    | PAX5    | 10248 | 30795 | 24348 | 0.374 | 61.745  | GM12878 |
| CEBPZ   | NFYA    | 455   | 1300  | 1141  | 0.374 | 139.245 | GM12878 |
| ETV6    | FOXM1   | 8277  | 22142 | 22379 | 0.372 | 59.497  | GM12878 |
| CREB1   | GABPA   | 7271  | 28275 | 13947 | 0.366 | 80.582  | GM12878 |
| FOXM1   | SKIL    | 8745  | 22379 | 25597 | 0.365 | 62.327  | GM12878 |
| CEBPZ   | FOS     | 595   | 1300  | 2042  | 0.365 | 135.477 | GM12878 |
| BCL11A  | TCF12   | 8428  | 21231 | 25135 | 0.365 | 62.289  | GM12878 |
| ATF2    | NFATC1  | 8030  | 30795 | 15744 | 0.365 | 59.969  | GM12878 |
| FOXM1   | ZBED1   | 6531  | 22379 | 14421 | 0.364 | 83.681  | GM12878 |
| ATF2    | MEF2C   | 6937  | 30795 | 11826 | 0.364 | 81.517  | GM12878 |
| CREM    | TCF12   | 10512 | 33311 | 25135 | 0.363 | 55.576  | GM12878 |
| MAZ     | MXI1    | 8446  | 23716 | 22963 | 0.362 | 53.640  | GM12878 |
| ETV6    | MEF2A   | 8049  | 22142 | 22587 | 0.360 | 51.844  | GM12878 |
| NFIC    | ZBED1   | 8470  | 38532 | 14421 | 0.359 | 63.012  | GM12878 |
| BCL11A  | ZBED1   | 6280  | 21231 | 14421 | 0.359 | 76.137  | GM12878 |
| POU2F2  | TCF12   | 9507  | 27931 | 25135 | 0.359 | 54.207  | GM12878 |
| ARNT    | BCL11A  | 7602  | 21468 | 21231 | 0.356 | 56.207  | GM12878 |
| IRF4    | NFATC3  | 8695  | 23042 | 25994 | 0.355 | 54.676  | GM12878 |
| BHLHE40 | SP1     | 7457  | 28650 | 15591 | 0.353 | 61.053  | GM12878 |
| IRF4    | SKIL    | 8555  | 23042 | 25597 | 0.352 | 51.389  | GM12878 |
| BCL11A  | BHLHE40 | 8664  | 21231 | 28650 | 0.351 | 54.046  | GM12878 |
| NFATC1  | STAT5A  | 4641  | 15744 | 11090 | 0.351 | 96.922  | GM12878 |
| MAZ     | SP1     | 6720  | 23716 | 15591 | 0.349 | 63.245  | GM12878 |
| ETV6    | ZBED1   | 6219  | 22142 | 14421 | 0.348 | 66.676  | GM12878 |
| MAX     | MAZ     | 7247  | 18647 | 23716 | 0.345 | 54.031  | GM12878 |
| BCL11A  | MEF2C   | 5451  | 21231 | 11826 | 0.344 | 63.513  | GM12878 |
| FOXM1   | MEF2C   | 5569  | 22379 | 11826 | 0.342 | 80.516  | GM12878 |
| MEF2C   | NFIC    | 7291  | 11826 | 38532 | 0.342 | 64.748  | GM12878 |
| NFATC1  | ZBED1   | 5146  | 15744 | 14421 | 0.342 | 74.728  | GM12878 |
| ELF1    | SP1     | 7048  | 27368 | 15591 | 0.341 | 53.591  | GM12878 |
| ETV6    | NFATC3  | 8184  | 22142 | 25994 | 0.341 | 54.011  | GM12878 |
| POU2F2  | SP1     | 7116  | 27931 | 15591 | 0.341 | 61.211  | GM12878 |
| PAX5    | TCF3    | 7301  | 24348 | 18871 | 0.341 | 65.719  | GM12878 |
| NR2C1   | SIX5    | 2621  | 10830 | 5476  | 0.340 | 105.347 | GM12878 |
| MEF2A   | ZBED1   | 6130  | 22587 | 14421 | 0.340 | 67.647  | GM12878 |
| SP1     | TCF12   | 6718  | 15591 | 25135 | 0.339 | 56.924  | GM12878 |
| KLF5    | ZNF207  | 5124  | 13891 | 16441 | 0.339 | 79.248  | GM12878 |
| ETS1    | GABPA   | 4533  | 12891 | 13947 | 0.338 | 79.040  | GM12878 |
| MEF2A   | PAX5    | 7925  | 22587 | 24348 | 0.338 | 50.931  | GM12878 |
| BHLHE40 | IRF4    | 8671  | 28650 | 23042 | 0.337 | 53.755  | GM12878 |
| CREM    | MEF2C   | 6692  | 33311 | 11826 | 0.337 | 59.231  | GM12878 |
| IRF4    | TCF12   | 8041  | 23042 | 25135 | 0.334 | 61.099  | GM12878 |
| IRF4    | JUND    | 4415  | 23042 | 7601  | 0.334 | 101.168 | GM12878 |
| SIX5    | SREBF1  | 1456  | 5476  | 3497  | 0.333 | 109.016 | GM12878 |
| FOXM1   | NFATC1  | 6243  | 22379 | 15744 | 0.333 | 54.665  | GM12878 |
| ATF2    | GABPA   | 6864  | 30795 | 13947 | 0.331 | 53.605  | GM12878 |
| ETV6    | GABPA   | 5807  | 22142 | 13947 | 0.330 | 63.720  | GM12878 |
| BACH1   | NKRF    | 7750  | 24260 | 22769 | 0.330 | 52.998  | GM12878 |
| BCL11A  | NFATC1  | 6014  | 21231 | 15744 | 0.329 | 59.043  | GM12878 |
| BCL11A  | JUND    | 4139  | 21231 | 7601  | 0.326 | 79.920  | GM12878 |
| FOS     | NFYB    | 1778  | 2042  | 14677 | 0.325 | 84.996  | GM12878 |
| MXI1    | TBP     | 7006  | 22963 | 20320 | 0.324 | 60.992  | GM12878 |

|        |        |       |       |       |       |         |         |
|--------|--------|-------|-------|-------|-------|---------|---------|
| IRF4   | ZBED1  | 5877  | 23042 | 14421 | 0.322 | 59.224  | GM12878 |
| ETV6   | SKIL   | 7560  | 22142 | 25597 | 0.318 | 53.493  | GM12878 |
| IRF3   | SP1    | 2721  | 4772  | 15591 | 0.315 | 83.094  | GM12878 |
| ETS1   | SP1    | 4457  | 12891 | 15591 | 0.314 | 63.319  | GM12878 |
| MEF2C  | ZBED1  | 4103  | 11826 | 14421 | 0.314 | 67.459  | GM12878 |
| CEBPB  | FOXM1  | 3370  | 5173  | 22379 | 0.313 | 97.187  | GM12878 |
| CREM   | JUND   | 4976  | 33311 | 7601  | 0.313 | 57.835  | GM12878 |
| FOS    | SP1    | 1761  | 2042  | 15591 | 0.312 | 91.117  | GM12878 |
| IRF4   | NFATC1 | 5867  | 23042 | 15744 | 0.308 | 65.727  | GM12878 |
| FOXM1  | TCF7   | 4555  | 22379 | 9835  | 0.307 | 57.818  | GM12878 |
| ELK1   | ETS1   | 3033  | 7580  | 12891 | 0.307 | 76.652  | GM12878 |
| MAX    | USF2   | 3674  | 18647 | 7690  | 0.307 | 81.050  | GM12878 |
| ATF2   | JUND   | 4685  | 30795 | 7601  | 0.306 | 51.371  | GM12878 |
| MEF2A  | NFATC1 | 5741  | 22587 | 15744 | 0.304 | 57.213  | GM12878 |
| STAT5A | ZBED1  | 3850  | 11090 | 14421 | 0.304 | 64.427  | GM12878 |
| IRF4   | SP1    | 5760  | 23042 | 15591 | 0.304 | 54.024  | GM12878 |
| NFATC3 | ZBED1  | 5883  | 25994 | 14421 | 0.304 | 53.888  | GM12878 |
| ETV6   | NFATC1 | 5673  | 22142 | 15744 | 0.304 | 50.701  | GM12878 |
| ATF2   | STAT5A | 5614  | 30795 | 11090 | 0.304 | 54.557  | GM12878 |
| NFIC   | TCF7   | 5907  | 38532 | 9835  | 0.303 | 52.114  | GM12878 |
| ELF1   | ELK1   | 4364  | 27368 | 7580  | 0.303 | 64.108  | GM12878 |
| BATF   | JUND   | 5042  | 36828 | 7601  | 0.301 | 69.481  | GM12878 |
| E2F6   | MAX    | 18090 | 31301 | 41947 | 0.499 | 84.430  | H1      |
| CTCF   | ZNF143 | 22202 | 57335 | 36137 | 0.488 | 53.554  | H1      |
| USF1   | USF2   | 7047  | 30940 | 8328  | 0.439 | 134.339 | H1      |
| ATF3   | USF2   | 2423  | 5657  | 8328  | 0.353 | 129.753 | H1      |
| CREB1  | TBP    | 6510  | 19981 | 22252 | 0.309 | 53.809  | H1      |
| BACH1  | MAFK   | 3974  | 12876 | 13405 | 0.302 | 73.055  | H1      |
| ZNF34  | ZNF426 | 7205  | 10050 | 8879  | 0.763 | 363.424 | HEK293  |
| ZNF426 | ZNF555 | 5652  | 8879  | 6703  | 0.733 | 274.994 | HEK293  |
| EGR2   | ZFHX2  | 45127 | 62403 | 66444 | 0.701 | 120.041 | HEK293  |
| ZNF34  | ZNF555 | 5657  | 10050 | 6703  | 0.689 | 350.019 | HEK293  |
| ZNF433 | ZNF555 | 3019  | 3798  | 6703  | 0.598 | 272.116 | HEK293  |
| ZNF433 | ZNF560 | 2175  | 3798  | 3492  | 0.597 | 213.803 | HEK293  |
| ZNF140 | ZNF555 | 4174  | 7978  | 6703  | 0.571 | 231.953 | HEK293  |
| ZNF426 | ZNF433 | 3293  | 8879  | 3798  | 0.567 | 209.693 | HEK293  |
| ZNF140 | ZNF433 | 3042  | 7978  | 3798  | 0.553 | 200.831 | HEK293  |
| ZNF140 | ZNF426 | 4644  | 7978  | 8879  | 0.552 | 212.828 | HEK293  |
| ZFP69B | ZNF692 | 15511 | 24305 | 34826 | 0.533 | 142.055 | HEK293  |
| ZNF34  | ZNF433 | 3285  | 10050 | 3798  | 0.532 | 203.805 | HEK293  |
| MAZ    | PATZ1  | 22402 | 42804 | 41663 | 0.530 | 112.255 | HEK293  |
| SP2    | SP3    | 16013 | 31446 | 29750 | 0.524 | 124.987 | HEK293  |
| ZNF140 | ZNF34  | 4580  | 7978  | 10050 | 0.511 | 210.740 | HEK293  |
| ZNF555 | ZNF560 | 2474  | 6703  | 3492  | 0.511 | 211.233 | HEK293  |
| ZBTB21 | ZNF629 | 14800 | 20325 | 43843 | 0.496 | 143.132 | HEK293  |
| ZNF266 | ZNF433 | 2191  | 5240  | 3798  | 0.491 | 210.418 | HEK293  |
| ZNF426 | ZNF623 | 5527  | 8879  | 15029 | 0.478 | 192.118 | HEK293  |
| ZNF555 | ZNF623 | 4760  | 6703  | 15029 | 0.474 | 205.913 | HEK293  |
| ZNF426 | ZNF560 | 2638  | 8879  | 3492  | 0.474 | 172.049 | HEK293  |
| ZNF140 | ZNF560 | 2487  | 7978  | 3492  | 0.471 | 193.379 | HEK293  |
| ZEB2   | ZNF629 | 19682 | 40116 | 43843 | 0.469 | 78.431  | HEK293  |
| SCRT1  | SCRT2  | 19336 | 26938 | 64216 | 0.465 | 95.085  | HEK293  |

|         |         |       |       |       |       |         |        |
|---------|---------|-------|-------|-------|-------|---------|--------|
| ZNF518A | ZNF555  | 5188  | 18621 | 6703  | 0.464 | 189.979 | HEK293 |
| ZNF34   | ZNF518A | 6320  | 10050 | 18621 | 0.462 | 172.578 | HEK293 |
| SP7     | ZEB2    | 20699 | 50285 | 40116 | 0.461 | 87.137  | HEK293 |
| ZNF292  | ZNF433  | 1237  | 1922  | 3798  | 0.458 | 203.536 | HEK293 |
| ZNF34   | ZNF623  | 5599  | 10050 | 15029 | 0.456 | 157.679 | HEK293 |
| ZNF426  | ZNF518A | 5848  | 8879  | 18621 | 0.455 | 141.287 | HEK293 |
| SP7     | ZNF629  | 21080 | 50285 | 43843 | 0.449 | 68.597  | HEK293 |
| KLF8    | SP3     | 13817 | 32219 | 29750 | 0.446 | 100.003 | HEK293 |
| ZNF34   | ZNF560  | 2638  | 10050 | 3492  | 0.445 | 208.955 | HEK293 |
| MAZ     | SP3     | 15876 | 42804 | 29750 | 0.445 | 96.056  | HEK293 |
| INSM2   | TSHZ1   | 6408  | 17714 | 12240 | 0.435 | 127.254 | HEK293 |
| ZNF266  | ZNF560  | 1860  | 5240  | 3492  | 0.435 | 216.384 | HEK293 |
| INSM2   | ZNF639  | 7707  | 17714 | 18233 | 0.429 | 136.496 | HEK293 |
| ZNF433  | ZNF623  | 3232  | 3798  | 15029 | 0.428 | 169.390 | HEK293 |
| ZNF292  | ZNF560  | 1105  | 1922  | 3492  | 0.427 | 208.590 | HEK293 |
| ZNF266  | ZNF555  | 2525  | 5240  | 6703  | 0.426 | 155.408 | HEK293 |
| ZFP37   | ZNF501  | 8903  | 19451 | 22541 | 0.425 | 133.099 | HEK293 |
| ZNF24   | ZNF639  | 8387  | 21595 | 18233 | 0.423 | 147.566 | HEK293 |
| KLF9    | SP3     | 11534 | 25095 | 29750 | 0.422 | 97.516  | HEK293 |
| GLIS2   | PATZ1   | 17295 | 40291 | 41663 | 0.422 | 74.465  | HEK293 |
| KLF8    | ZEB2    | 15164 | 32219 | 40116 | 0.422 | 73.216  | HEK293 |
| ZEB2    | ZXDB    | 16221 | 40116 | 36901 | 0.422 | 88.559  | HEK293 |
| ZNF843  | ZXDB    | 12944 | 25751 | 36901 | 0.420 | 93.030  | HEK293 |
| FEZF1   | ZNF843  | 12360 | 33696 | 25751 | 0.420 | 128.471 | HEK293 |
| ZNF629  | ZXDB    | 16869 | 43843 | 36901 | 0.419 | 62.313  | HEK293 |
| ZNF292  | ZNF404  | 880   | 1922  | 2306  | 0.418 | 179.710 | HEK293 |
| ZBTB11  | ZNF518A | 8760  | 23626 | 18621 | 0.418 | 108.575 | HEK293 |
| ZNF324  | ZNF639  | 7274  | 16663 | 18233 | 0.417 | 121.288 | HEK293 |
| ZNF24   | ZNF324  | 7877  | 21595 | 16663 | 0.415 | 124.847 | HEK293 |
| ZNF292  | ZNF354C | 742   | 1922  | 1678  | 0.413 | 187.573 | HEK293 |
| SP7     | ZXDB    | 17787 | 50285 | 36901 | 0.413 | 64.834  | HEK293 |
| ZNF404  | ZNF433  | 1222  | 2306  | 3798  | 0.413 | 177.894 | HEK293 |
| MAZ     | ZBTB26  | 15950 | 42804 | 35149 | 0.411 | 79.211  | HEK293 |
| ZNF629  | ZNF639  | 11579 | 43843 | 18233 | 0.410 | 116.937 | HEK293 |
| YY1     | YY2     | 4718  | 12504 | 10615 | 0.410 | 140.995 | HEK293 |
| GLIS1   | GLIS2   | 20697 | 64378 | 40291 | 0.406 | 58.803  | HEK293 |
| MAZ     | SP2     | 14880 | 42804 | 31446 | 0.406 | 80.939  | HEK293 |
| INSM2   | ZNF24   | 7926  | 17714 | 21595 | 0.405 | 132.903 | HEK293 |
| KLF8    | KLF9    | 11460 | 32219 | 25095 | 0.403 | 89.522  | HEK293 |
| ZNF24   | ZNF629  | 12387 | 21595 | 43843 | 0.403 | 84.461  | HEK293 |
| KLF8    | PATZ1   | 14731 | 32219 | 41663 | 0.402 | 76.724  | HEK293 |
| KLF8    | ZXDB    | 13857 | 32219 | 36901 | 0.402 | 90.165  | HEK293 |
| ZNF433  | ZNF510  | 1840  | 3798  | 5540  | 0.401 | 182.187 | HEK293 |
| ZEB2    | ZNF24   | 11791 | 40116 | 21595 | 0.401 | 109.385 | HEK293 |
| KLF16   | KLF8    | 9578  | 18018 | 32219 | 0.398 | 116.349 | HEK293 |
| ZNF354C | ZNF404  | 780   | 1678  | 2306  | 0.397 | 170.156 | HEK293 |
| ZEB2    | ZNF843  | 12734 | 40116 | 25751 | 0.396 | 98.961  | HEK293 |
| KLF8    | MAZ     | 14705 | 32219 | 42804 | 0.396 | 83.038  | HEK293 |
| INSM2   | ZNF629  | 11023 | 17714 | 43843 | 0.396 | 86.961  | HEK293 |
| KLF8    | SP7     | 15909 | 32219 | 50285 | 0.395 | 79.800  | HEK293 |
| ZNF140  | ZNF623  | 4313  | 7978  | 15029 | 0.394 | 145.867 | HEK293 |
| ZNF324  | ZNF391  | 5996  | 16663 | 13956 | 0.393 | 127.321 | HEK293 |

|         |         |       |       |       |       |         |        |
|---------|---------|-------|-------|-------|-------|---------|--------|
| ZNF266  | ZNF292  | 1247  | 5240  | 1922  | 0.393 | 172.969 | HEK293 |
| ZNF266  | ZNF426  | 2675  | 5240  | 8879  | 0.392 | 148.802 | HEK293 |
| INSM2   | ZNF843  | 8346  | 17714 | 25751 | 0.391 | 105.230 | HEK293 |
| KLF8    | ZNF629  | 14653 | 32219 | 43843 | 0.390 | 67.902  | HEK293 |
| ZNF140  | ZNF266  | 2515  | 7978  | 5240  | 0.389 | 148.776 | HEK293 |
| ZBTB8A  | ZXDB    | 15180 | 41359 | 36901 | 0.389 | 76.169  | HEK293 |
| ZNF639  | ZSCAN23 | 5019  | 18233 | 9154  | 0.388 | 133.712 | HEK293 |
| ZEB2    | ZNF692  | 14516 | 40116 | 34826 | 0.388 | 71.431  | HEK293 |
| KLF17   | KLF8    | 11799 | 28900 | 32219 | 0.387 | 87.527  | HEK293 |
| KLF16   | KLF9    | 8220  | 18018 | 25095 | 0.387 | 108.426 | HEK293 |
| INSM2   | ZEB2    | 10253 | 17714 | 40116 | 0.385 | 86.875  | HEK293 |
| ZNF394  | ZNF518A | 9430  | 32293 | 18621 | 0.385 | 114.955 | HEK293 |
| SP7     | ZNF843  | 13831 | 50285 | 25751 | 0.384 | 74.100  | HEK293 |
| PATZ1   | SP3     | 13513 | 41663 | 29750 | 0.384 | 72.839  | HEK293 |
| PATZ1   | ZEB2    | 15671 | 41663 | 40116 | 0.383 | 74.709  | HEK293 |
| TSHZ1   | ZNF639  | 5710  | 12240 | 18233 | 0.382 | 108.508 | HEK293 |
| ZNF138  | ZNF292  | 680   | 1647  | 1922  | 0.382 | 168.007 | HEK293 |
| OSR2    | ZNF843  | 11590 | 35833 | 25751 | 0.382 | 97.476  | HEK293 |
| ZNF266  | ZNF404  | 1326  | 5240  | 2306  | 0.381 | 125.249 | HEK293 |
| KLF9    | SP2     | 10702 | 25095 | 31446 | 0.381 | 97.888  | HEK293 |
| KLF10   | KLF8    | 10220 | 22350 | 32219 | 0.381 | 74.868  | HEK293 |
| KLF8    | SP2     | 12098 | 32219 | 31446 | 0.380 | 92.211  | HEK293 |
| ZNF404  | ZNF560  | 1078  | 2306  | 3492  | 0.380 | 172.784 | HEK293 |
| ZNF433  | ZNF518A | 3194  | 3798  | 18621 | 0.380 | 130.216 | HEK293 |
| ZNF391  | ZNF639  | 6052  | 13956 | 18233 | 0.379 | 106.854 | HEK293 |
| SP7     | ZNF24   | 12490 | 50285 | 21595 | 0.379 | 84.568  | HEK293 |
| INSM2   | ZNF324  | 6509  | 17714 | 16663 | 0.379 | 109.823 | HEK293 |
| ZEB2    | ZNF324  | 9787  | 40116 | 16663 | 0.379 | 90.684  | HEK293 |
| GLIS2   | MAZ     | 15699 | 40291 | 42804 | 0.378 | 67.580  | HEK293 |
| ZNF34   | ZNF394  | 6806  | 10050 | 32293 | 0.378 | 120.017 | HEK293 |
| ZNF24   | ZNF843  | 8899  | 21595 | 25751 | 0.377 | 110.981 | HEK293 |
| KLF17   | SP7     | 14382 | 28900 | 50285 | 0.377 | 67.111  | HEK293 |
| TSHZ1   | ZNF843  | 6697  | 12240 | 25751 | 0.377 | 125.447 | HEK293 |
| ZNF629  | ZNF843  | 12666 | 43843 | 25751 | 0.377 | 85.702  | HEK293 |
| ZBTB21  | ZNF639  | 7222  | 20325 | 18233 | 0.375 | 108.646 | HEK293 |
| KLF8    | ZNF639  | 9086  | 32219 | 18233 | 0.375 | 87.518  | HEK293 |
| ZNF561  | ZSCAN30 | 9449  | 24194 | 26304 | 0.375 | 85.440  | HEK293 |
| ZEB2    | ZNF639  | 10117 | 40116 | 18233 | 0.374 | 85.924  | HEK293 |
| ZNF266  | ZNF34   | 2713  | 5240  | 10050 | 0.374 | 145.201 | HEK293 |
| ZEB2    | ZNF2    | 12794 | 40116 | 29224 | 0.374 | 79.928  | HEK293 |
| KLF9    | MAZ     | 12214 | 25095 | 42804 | 0.373 | 78.568  | HEK293 |
| ZNF2    | ZNF324  | 8200  | 29224 | 16663 | 0.372 | 100.728 | HEK293 |
| ZNF510  | ZNF560  | 1627  | 5540  | 3492  | 0.370 | 166.130 | HEK293 |
| KLF17   | ZNF324  | 8108  | 28900 | 16663 | 0.369 | 91.715  | HEK293 |
| BCL11A  | BCL11B  | 4906  | 14204 | 12552 | 0.367 | 137.479 | HEK293 |
| ZNF202  | ZNF433  | 1853  | 6698  | 3798  | 0.367 | 159.276 | HEK293 |
| KLF1    | KLF9    | 11404 | 38403 | 25095 | 0.367 | 74.338  | HEK293 |
| KLF16   | ZNF324  | 6357  | 18018 | 16663 | 0.367 | 119.485 | HEK293 |
| ZNF354C | ZNF433  | 926   | 1678  | 3798  | 0.367 | 153.049 | HEK293 |
| ZBTB11  | ZNF555  | 4607  | 23626 | 6703  | 0.366 | 145.030 | HEK293 |
| ZNF2    | ZNF391  | 7391  | 29224 | 13956 | 0.366 | 127.481 | HEK293 |
| KLF8    | ZNF324  | 8478  | 32219 | 16663 | 0.366 | 97.437  | HEK293 |

|         |         |       |       |       |       |         |        |
|---------|---------|-------|-------|-------|-------|---------|--------|
| ZNF560  | ZNF623  | 2649  | 3492  | 15029 | 0.366 | 126.588 | HEK293 |
| ZNF324  | ZSCAN23 | 4514  | 16663 | 9154  | 0.365 | 127.795 | HEK293 |
| ZNF138  | ZNF404  | 712   | 1647  | 2306  | 0.365 | 146.054 | HEK293 |
| KLF8    | ZNF692  | 12225 | 32219 | 34826 | 0.365 | 75.494  | HEK293 |
| INSM2   | SP7     | 10876 | 17714 | 50285 | 0.364 | 83.876  | HEK293 |
| PRDM4   | ZNF843  | 8660  | 22102 | 25751 | 0.363 | 96.840  | HEK293 |
| TSHZ1   | ZNF24   | 5899  | 12240 | 21595 | 0.363 | 91.776  | HEK293 |
| ZNF692  | ZXDB    | 13007 | 34826 | 36901 | 0.363 | 61.544  | HEK293 |
| KLF17   | ZEB2    | 12334 | 28900 | 40116 | 0.362 | 62.722  | HEK293 |
| ZFP69B  | ZNF324  | 7289  | 24305 | 16663 | 0.362 | 106.626 | HEK293 |
| PATZ1   | SP2     | 13073 | 41663 | 31446 | 0.361 | 63.530  | HEK293 |
| ZNF501  | ZXDB    | 10405 | 22541 | 36901 | 0.361 | 90.709  | HEK293 |
| SP7     | ZNF639  | 10919 | 50285 | 18233 | 0.361 | 64.850  | HEK293 |
| INSM2   | ZNF391  | 5664  | 17714 | 13956 | 0.360 | 130.425 | HEK293 |
| KLF1    | KLF8    | 12652 | 38403 | 32219 | 0.360 | 73.174  | HEK293 |
| INSM2   | ZSCAN23 | 4577  | 17714 | 9154  | 0.359 | 118.696 | HEK293 |
| FEZF1   | OSR2    | 12485 | 33696 | 35833 | 0.359 | 71.528  | HEK293 |
| ZNF394  | ZNF555  | 5280  | 32293 | 6703  | 0.359 | 106.523 | HEK293 |
| INSM2   | KLF8    | 8569  | 17714 | 32219 | 0.359 | 90.604  | HEK293 |
| ZNF19   | ZNF404  | 780   | 2055  | 2306  | 0.358 | 133.145 | HEK293 |
| ZNF561  | ZNF660  | 10019 | 24194 | 32350 | 0.358 | 92.924  | HEK293 |
| ZNF394  | ZNF426  | 6057  | 32293 | 8879  | 0.358 | 106.448 | HEK293 |
| PATZ1   | ZXDB    | 14025 | 41663 | 36901 | 0.358 | 56.220  | HEK293 |
| OVOL3   | ZNF843  | 5634  | 9640  | 25751 | 0.358 | 97.775  | HEK293 |
| ZNF140  | ZNF518A | 4349  | 7978  | 18621 | 0.357 | 99.920  | HEK293 |
| SP3     | ZXDB    | 11786 | 29750 | 36901 | 0.356 | 69.025  | HEK293 |
| ZNF518A | ZNF623  | 5936  | 18621 | 15029 | 0.355 | 97.435  | HEK293 |
| ZNF292  | ZNF555  | 1273  | 1922  | 6703  | 0.355 | 169.923 | HEK293 |
| ZNF138  | ZNF433  | 887   | 1647  | 3798  | 0.355 | 160.104 | HEK293 |
| ZNF24   | ZXDB    | 10004 | 21595 | 36901 | 0.354 | 75.386  | HEK293 |
| ZNF324  | ZNF692  | 8535  | 16663 | 34826 | 0.354 | 98.662  | HEK293 |
| KLF8    | ZNF24   | 9339  | 32219 | 21595 | 0.354 | 80.106  | HEK293 |
| ZNF639  | ZNF843  | 7657  | 18233 | 25751 | 0.353 | 92.206  | HEK293 |
| ZNF24   | ZNF391  | 6129  | 21595 | 13956 | 0.353 | 117.372 | HEK293 |
| ZNF510  | ZNF555  | 2151  | 5540  | 6703  | 0.353 | 161.021 | HEK293 |
| WT1     | ZNF843  | 9613  | 28823 | 25751 | 0.353 | 71.373  | HEK293 |
| SP7     | ZNF324  | 10187 | 50285 | 16663 | 0.352 | 80.488  | HEK293 |
| KLF16   | KLF17   | 8024  | 18018 | 28900 | 0.352 | 94.330  | HEK293 |
| MAZ     | ZNF398  | 12423 | 42804 | 29168 | 0.352 | 65.695  | HEK293 |
| ZNF19   | ZNF354C | 651   | 2055  | 1678  | 0.351 | 152.056 | HEK293 |
| ZNF2    | ZNF501  | 8992  | 29224 | 22541 | 0.350 | 72.938  | HEK293 |
| ZNF660  | ZSCAN30 | 10212 | 32350 | 26304 | 0.350 | 84.853  | HEK293 |
| ZNF266  | ZNF354C | 1037  | 5240  | 1678  | 0.350 | 146.590 | HEK293 |
| ZBTB11  | ZXDB    | 10324 | 23626 | 36901 | 0.350 | 71.701  | HEK293 |
| ZNF394  | ZXDB    | 12063 | 32293 | 36901 | 0.349 | 55.279  | HEK293 |
| ZNF639  | ZXDB    | 9063  | 18233 | 36901 | 0.349 | 80.906  | HEK293 |
| ZEB1    | ZNF639  | 5590  | 14079 | 18233 | 0.349 | 101.834 | HEK293 |
| TSHZ1   | ZNF629  | 8080  | 12240 | 43843 | 0.349 | 75.165  | HEK293 |
| PATZ1   | ZNF398  | 12156 | 41663 | 29168 | 0.349 | 72.786  | HEK293 |
| ZNF324  | ZNF629  | 9412  | 16663 | 43843 | 0.348 | 75.833  | HEK293 |
| ZBTB26  | ZBTB8A  | 13270 | 35149 | 41359 | 0.348 | 63.154  | HEK293 |
| KLF9    | PATZ1   | 11252 | 25095 | 41663 | 0.348 | 56.490  | HEK293 |

|         |         |       |       |       |       |         |        |
|---------|---------|-------|-------|-------|-------|---------|--------|
| KLF1    | KLF17   | 11585 | 38403 | 28900 | 0.348 | 65.245  | HEK293 |
| GLI2    | OVOL3   | 2582  | 5719  | 9640  | 0.348 | 98.572  | HEK293 |
| ZNF391  | ZSCAN23 | 3930  | 13956 | 9154  | 0.348 | 128.801 | HEK293 |
| BCL11A  | TSHZ1   | 4582  | 14204 | 12240 | 0.348 | 134.444 | HEK293 |
| ZNF138  | ZNF354C | 577   | 1647  | 1678  | 0.347 | 147.672 | HEK293 |
| ZBTB21  | ZNF24   | 7264  | 20325 | 21595 | 0.347 | 82.534  | HEK293 |
| KLF16   | KLF7    | 5246  | 18018 | 12712 | 0.347 | 115.623 | HEK293 |
| ZNF24   | ZNF692  | 9494  | 21595 | 34826 | 0.346 | 79.046  | HEK293 |
| ZBTB11  | ZNF426  | 5007  | 23626 | 8879  | 0.346 | 118.170 | HEK293 |
| ZNF324  | ZNF843  | 7159  | 16663 | 25751 | 0.346 | 88.882  | HEK293 |
| KLF17   | ZNF629  | 12278 | 28900 | 43843 | 0.345 | 59.900  | HEK293 |
| KLF17   | ZNF639  | 7906  | 28900 | 18233 | 0.344 | 85.190  | HEK293 |
| SP7     | ZNF2    | 13174 | 50285 | 29224 | 0.344 | 55.594  | HEK293 |
| KLF17   | PATZ1   | 11922 | 28900 | 41663 | 0.344 | 66.161  | HEK293 |
| ZEB1    | ZEB2    | 8153  | 14079 | 40116 | 0.343 | 91.141  | HEK293 |
| BCL11A  | INSM2   | 5435  | 14204 | 17714 | 0.343 | 95.817  | HEK293 |
| ZBTB11  | ZNF394  | 9439  | 23626 | 32293 | 0.342 | 68.879  | HEK293 |
| ZNF354C | ZNF560  | 827   | 1678  | 3492  | 0.342 | 134.928 | HEK293 |
| AEBP2   | ZNF292  | 742   | 2455  | 1922  | 0.342 | 148.797 | HEK293 |
| KLF10   | ZNF561  | 7936  | 22350 | 24194 | 0.341 | 78.790  | HEK293 |
| ZBTB11  | ZBTB8A  | 10659 | 23626 | 41359 | 0.341 | 73.841  | HEK293 |
| KLF8    | ZNF843  | 9816  | 32219 | 25751 | 0.341 | 64.553  | HEK293 |
| KLF17   | ZNF391  | 6826  | 28900 | 13956 | 0.340 | 84.963  | HEK293 |
| ZNF24   | ZSCAN23 | 4777  | 21595 | 9154  | 0.340 | 107.634 | HEK293 |
| KLF17   | ZNF24   | 8485  | 28900 | 21595 | 0.340 | 74.535  | HEK293 |
| TSHZ1   | ZSCAN23 | 3595  | 12240 | 9154  | 0.340 | 113.422 | HEK293 |
| ZNF19   | ZNF292  | 674   | 2055  | 1922  | 0.339 | 171.967 | HEK293 |
| ZBTB11  | ZNF34   | 5218  | 23626 | 10050 | 0.339 | 96.479  | HEK293 |
| OVOL3   | TSHZ1   | 3676  | 9640  | 12240 | 0.338 | 120.104 | HEK293 |
| INSM2   | KLF17   | 7656  | 17714 | 28900 | 0.338 | 95.163  | HEK293 |
| ZNF2    | ZNF24   | 8490  | 29224 | 21595 | 0.338 | 77.828  | HEK293 |
| KLF8    | ZNF76   | 8080  | 32219 | 17824 | 0.337 | 96.952  | HEK293 |
| SP3     | ZNF76   | 7760  | 29750 | 17824 | 0.337 | 80.988  | HEK293 |
| ZNF324  | ZXDB    | 8354  | 16663 | 36901 | 0.337 | 80.296  | HEK293 |
| KLF16   | SP3     | 7797  | 18018 | 29750 | 0.337 | 74.397  | HEK293 |
| ZEB2    | ZNF501  | 10117 | 40116 | 22541 | 0.336 | 69.093  | HEK293 |
| ZEB2    | ZFP69B  | 10504 | 40116 | 24305 | 0.336 | 78.198  | HEK293 |
| KLF17   | ZNF692  | 10655 | 28900 | 34826 | 0.336 | 59.552  | HEK293 |
| KLF10   | KLF9    | 7952  | 22350 | 25095 | 0.336 | 95.460  | HEK293 |
| KLF8    | ZNF391  | 7115  | 32219 | 13956 | 0.336 | 92.381  | HEK293 |
| SP3     | ZBTB26  | 10846 | 29750 | 35149 | 0.335 | 63.683  | HEK293 |
| INSM2   | ZBTB21  | 6354  | 17714 | 20325 | 0.335 | 99.977  | HEK293 |
| ZFP69B  | ZNF24   | 7671  | 24305 | 21595 | 0.335 | 91.411  | HEK293 |
| AEBP2   | ZNF354C | 679   | 2455  | 1678  | 0.335 | 146.359 | HEK293 |
| ZNF2    | ZNF639  | 7714  | 29224 | 18233 | 0.334 | 96.775  | HEK293 |
| ZNF433  | ZNF680  | 2136  | 3798  | 10768 | 0.334 | 125.714 | HEK293 |
| PATZ1   | ZBTB10  | 9201  | 41663 | 18260 | 0.334 | 73.715  | HEK293 |
| KLF16   | ZXDB    | 8594  | 18018 | 36901 | 0.333 | 76.398  | HEK293 |
| KLF17   | MAZ     | 11718 | 28900 | 42804 | 0.333 | 56.315  | HEK293 |
| ZNF266  | ZNF510  | 1795  | 5240  | 5540  | 0.333 | 122.209 | HEK293 |
| KLF16   | ZNF391  | 5274  | 18018 | 13956 | 0.333 | 94.272  | HEK293 |
| ZNF324  | ZSCAN21 | 6370  | 16663 | 22039 | 0.332 | 95.750  | HEK293 |



|         |         |       |       |       |       |         |        |
|---------|---------|-------|-------|-------|-------|---------|--------|
| KLF16   | ZEB2    | 8920  | 18018 | 40116 | 0.332 | 66.135  | HEK293 |
| PATZ1   | ZBTB26  | 12676 | 41663 | 35149 | 0.331 | 55.867  | HEK293 |
| KLF7    | KLF8    | 6702  | 12712 | 32219 | 0.331 | 76.056  | HEK293 |
| ZNF140  | ZNF292  | 1296  | 7978  | 1922  | 0.331 | 147.441 | HEK293 |
| FEZF1   | PRDM6   | 12964 | 33696 | 45657 | 0.331 | 54.179  | HEK293 |
| ZNF24   | ZSCAN21 | 7210  | 21595 | 22039 | 0.330 | 79.996  | HEK293 |
| ZNF76   | ZXDB    | 8457  | 17824 | 36901 | 0.330 | 67.841  | HEK293 |
| ZBTB21  | ZNF324  | 6067  | 20325 | 16663 | 0.330 | 90.649  | HEK293 |
| KLF10   | ZEB2    | 9864  | 22350 | 40116 | 0.329 | 59.057  | HEK293 |
| ZNF292  | ZNF510  | 1074  | 1922  | 5540  | 0.329 | 125.341 | HEK293 |
| KLF10   | SP3     | 8481  | 22350 | 29750 | 0.329 | 83.180  | HEK293 |
| TSHZ1   | ZEB2    | 7274  | 12240 | 40116 | 0.328 | 79.585  | HEK293 |
| ZNF2    | ZNF692  | 10464 | 29224 | 34826 | 0.328 | 62.179  | HEK293 |
| ZNF2    | ZXDB    | 10761 | 29224 | 36901 | 0.328 | 64.694  | HEK293 |
| IKZF3   | ZSCAN30 | 9379  | 31196 | 26304 | 0.327 | 68.319  | HEK293 |
| ZNF324  | ZNF610  | 5149  | 16663 | 14846 | 0.327 | 97.651  | HEK293 |
| INSM2   | ZXDB    | 8361  | 17714 | 36901 | 0.327 | 72.238  | HEK293 |
| ZNF394  | ZNF501  | 8814  | 32293 | 22541 | 0.327 | 62.136  | HEK293 |
| KLF17   | ZNF2    | 9490  | 28900 | 29224 | 0.327 | 72.770  | HEK293 |
| ZNF2    | ZSCAN21 | 8283  | 29224 | 22039 | 0.326 | 80.781  | HEK293 |
| KLF16   | ZNF692  | 8162  | 18018 | 34826 | 0.326 | 71.725  | HEK293 |
| ZNF138  | ZNF560  | 781   | 1647  | 3492  | 0.326 | 143.036 | HEK293 |
| ZBTB8A  | ZNF394  | 11879 | 41359 | 32293 | 0.325 | 58.123  | HEK293 |
| KLF8    | ZFP69B  | 9087  | 32219 | 24305 | 0.325 | 61.129  | HEK293 |
| KLF16   | MAZ     | 9017  | 18018 | 42804 | 0.325 | 63.823  | HEK293 |
| BCL11A  | ZNF843  | 6206  | 14204 | 25751 | 0.324 | 103.262 | HEK293 |
| ZNF391  | ZNF843  | 6142  | 13956 | 25751 | 0.324 | 92.497  | HEK293 |
| ZBTB20  | ZBTB26  | 12532 | 42580 | 35149 | 0.324 | 52.515  | HEK293 |
| INSM2   | WT1     | 7319  | 17714 | 28823 | 0.324 | 68.202  | HEK293 |
| ZNF202  | ZNF560  | 1566  | 6698  | 3492  | 0.324 | 128.485 | HEK293 |
| KLF16   | PATZ1   | 8869  | 18018 | 41663 | 0.324 | 82.142  | HEK293 |
| GLI2    | TSHZ1   | 2708  | 5719  | 12240 | 0.324 | 145.264 | HEK293 |
| ZNF639  | ZSCAN21 | 6487  | 18233 | 22039 | 0.324 | 87.174  | HEK293 |
| SP3     | ZEB2    | 11173 | 29750 | 40116 | 0.323 | 59.389  | HEK293 |
| ZNF518A | ZNF560  | 2603  | 18621 | 3492  | 0.323 | 118.127 | HEK293 |
| ZEB2    | ZNF391  | 7637  | 40116 | 13956 | 0.323 | 77.416  | HEK293 |
| BCL11A  | ZNF639  | 5184  | 14204 | 18233 | 0.322 | 107.154 | HEK293 |
| ZFP69B  | ZNF639  | 6780  | 24305 | 18233 | 0.322 | 73.332  | HEK293 |
| ZNF692  | ZNF843  | 9642  | 34826 | 25751 | 0.322 | 66.406  | HEK293 |
| ZNF292  | ZNF426  | 1328  | 1922  | 8879  | 0.321 | 121.670 | HEK293 |
| KLF10   | ZNF629  | 10047 | 22350 | 43843 | 0.321 | 55.138  | HEK293 |
| INSM2   | OVOL3   | 4190  | 17714 | 9640  | 0.321 | 132.862 | HEK293 |
| ZEB1    | ZNF324  | 4910  | 14079 | 16663 | 0.321 | 81.299  | HEK293 |
| KLF17   | ZFP69B  | 8487  | 28900 | 24305 | 0.320 | 80.791  | HEK293 |
| SP7     | ZNF501  | 10773 | 50285 | 22541 | 0.320 | 51.451  | HEK293 |
| ZNF202  | ZNF555  | 2143  | 6698  | 6703  | 0.320 | 114.225 | HEK293 |
| KLF8    | ZBTB26  | 10741 | 32219 | 35149 | 0.319 | 58.417  | HEK293 |
| ZNF354C | ZNF514  | 536   | 1678  | 1682  | 0.319 | 155.699 | HEK293 |
| ZNF404  | ZNF555  | 1254  | 2306  | 6703  | 0.319 | 116.380 | HEK293 |
| ZNF324  | ZNF501  | 6178  | 16663 | 22541 | 0.319 | 89.116  | HEK293 |
| KLF1    | KLF7    | 7034  | 38403 | 12712 | 0.318 | 76.637  | HEK293 |
| INSM2   | ZFP69B  | 6602  | 17714 | 24305 | 0.318 | 85.994  | HEK293 |

|         |         |       |       |       |       |         |        |
|---------|---------|-------|-------|-------|-------|---------|--------|
| KLF17   | WT1     | 9177  | 28900 | 28823 | 0.318 | 66.685  | HEK293 |
| MAZ     | ZNF76   | 8778  | 42804 | 17824 | 0.318 | 59.930  | HEK293 |
| KLF8    | ZNF2    | 9747  | 32219 | 29224 | 0.318 | 56.575  | HEK293 |
| ZBTB21  | ZEB2    | 9066  | 20325 | 40116 | 0.317 | 73.586  | HEK293 |
| ZNF391  | ZNF501  | 5625  | 13956 | 22541 | 0.317 | 93.778  | HEK293 |
| TSHZ1   | ZNF324  | 4529  | 12240 | 16663 | 0.317 | 88.856  | HEK293 |
| ZNF202  | ZNF266  | 1877  | 6698  | 5240  | 0.317 | 134.002 | HEK293 |
| ZEB2    | ZNF660  | 11410 | 40116 | 32350 | 0.317 | 54.037  | HEK293 |
| KLF17   | ZXDB    | 10341 | 28900 | 36901 | 0.317 | 61.892  | HEK293 |
| ZFP69B  | ZNF391  | 5827  | 24305 | 13956 | 0.316 | 78.630  | HEK293 |
| ZNF518A | ZXDB    | 8289  | 18621 | 36901 | 0.316 | 64.093  | HEK293 |
| ZEB2    | ZNF561  | 9840  | 40116 | 24194 | 0.316 | 61.551  | HEK293 |
| AEBP2   | ZNF404  | 751   | 2455  | 2306  | 0.316 | 131.082 | HEK293 |
| ZNF138  | ZNF266  | 927   | 1647  | 5240  | 0.316 | 128.442 | HEK293 |
| ZBTB11  | ZNF433  | 2985  | 23626 | 3798  | 0.315 | 108.601 | HEK293 |
| SP7     | TSHZ1   | 7809  | 50285 | 12240 | 0.315 | 64.818  | HEK293 |
| AEBP2   | ZNF433  | 961   | 2455  | 3798  | 0.315 | 142.289 | HEK293 |
| ZNF426  | ZNF510  | 2206  | 8879  | 5540  | 0.315 | 121.857 | HEK293 |
| ZNF34   | ZNF510  | 2345  | 10050 | 5540  | 0.314 | 116.294 | HEK293 |
| ZNF140  | ZNF510  | 2087  | 7978  | 5540  | 0.314 | 135.400 | HEK293 |
| ZEB2    | ZSCAN21 | 9309  | 40116 | 22039 | 0.313 | 61.556  | HEK293 |
| ZBTB26  | ZNF76   | 7825  | 35149 | 17824 | 0.313 | 73.836  | HEK293 |
| TSHZ1   | WT1     | 5866  | 12240 | 28823 | 0.312 | 86.219  | HEK293 |
| ZNF266  | ZNF623  | 2768  | 5240  | 15029 | 0.312 | 94.433  | HEK293 |
| ZNF639  | ZNF692  | 7859  | 18233 | 34826 | 0.312 | 68.789  | HEK293 |
| ZFP37   | ZNF394  | 7808  | 19451 | 32293 | 0.312 | 75.220  | HEK293 |
| BCL11A  | ZEB2    | 7427  | 14204 | 40116 | 0.311 | 79.141  | HEK293 |
| ZNF580  | ZXDB    | 9456  | 25124 | 36901 | 0.311 | 66.464  | HEK293 |
| ZNF2    | ZNF843  | 8515  | 29224 | 25751 | 0.310 | 84.447  | HEK293 |
| BCL11A  | ZNF24   | 5436  | 14204 | 21595 | 0.310 | 123.288 | HEK293 |
| ZNF580  | ZNF843  | 7893  | 25124 | 25751 | 0.310 | 65.122  | HEK293 |
| KLF16   | SP7     | 9334  | 18018 | 50285 | 0.310 | 51.384  | HEK293 |
| INSM2   | ZNF692  | 7702  | 17714 | 34826 | 0.310 | 78.861  | HEK293 |
| KLF7    | KLF9    | 5538  | 12712 | 25095 | 0.310 | 97.496  | HEK293 |
| ZNF19   | ZNF433  | 866   | 2055  | 3798  | 0.310 | 122.206 | HEK293 |
| KLF10   | ZXDB    | 8897  | 22350 | 36901 | 0.310 | 50.713  | HEK293 |
| ZNF561  | ZXDB    | 9247  | 24194 | 36901 | 0.309 | 54.287  | HEK293 |
| ZNF394  | ZNF639  | 7509  | 32293 | 18233 | 0.309 | 68.529  | HEK293 |
| ZNF518A | ZNF558  | 5197  | 18621 | 15148 | 0.309 | 86.391  | HEK293 |
| ZFP69B  | ZNF2    | 8244  | 24305 | 29224 | 0.309 | 65.548  | HEK293 |
| INSM2   | ZSCAN21 | 6111  | 17714 | 22039 | 0.309 | 98.901  | HEK293 |
| ZEB1    | ZNF24   | 5388  | 14079 | 21595 | 0.309 | 90.343  | HEK293 |
| KLF9    | ZBTB26  | 9173  | 25095 | 35149 | 0.309 | 76.058  | HEK293 |
| ATF2    | ZBTB21  | 7718  | 30766 | 20325 | 0.309 | 74.128  | HEK293 |
| AEBP2   | ZNF266  | 1106  | 2455  | 5240  | 0.308 | 126.874 | HEK293 |
| ZNF404  | ZNF510  | 1102  | 2306  | 5540  | 0.308 | 128.594 | HEK293 |
| PRDM4   | TSHZ1   | 5070  | 22102 | 12240 | 0.308 | 89.505  | HEK293 |
| INSM2   | ZNF2    | 7011  | 17714 | 29224 | 0.308 | 75.789  | HEK293 |
| ZNF391  | ZSCAN21 | 5403  | 13956 | 22039 | 0.308 | 99.778  | HEK293 |
| ZNF2    | ZNF629  | 11012 | 29224 | 43843 | 0.308 | 55.180  | HEK293 |
| SP2     | ZBTB26  | 10227 | 31446 | 35149 | 0.308 | 53.625  | HEK293 |
| ZBTB10  | ZBTB7A  | 4273  | 18260 | 10584 | 0.307 | 101.128 | HEK293 |

|         |         |       |       |       |       |         |         |
|---------|---------|-------|-------|-------|-------|---------|---------|
| ZFP69B  | ZNF629  | 10029 | 24305 | 43843 | 0.307 | 53.676  | HEK293  |
| KLF8    | ZNF561  | 8577  | 32219 | 24194 | 0.307 | 68.979  | HEK293  |
| KLF16   | ZNF76   | 5505  | 18018 | 17824 | 0.307 | 91.064  | HEK293  |
| ZNF561  | ZNF692  | 8913  | 24194 | 34826 | 0.307 | 59.960  | HEK293  |
| SP7     | ZNF391  | 8128  | 50285 | 13956 | 0.307 | 68.892  | HEK293  |
| OVOL3   | ZXDB    | 5774  | 9640  | 36901 | 0.306 | 83.152  | HEK293  |
| GFI1B   | GLI2    | 2425  | 10973 | 5719  | 0.306 | 91.035  | HEK293  |
| TSHZ1   | ZNF391  | 3997  | 12240 | 13956 | 0.306 | 110.270 | HEK293  |
| OSR2    | TSHZ1   | 6401  | 35833 | 12240 | 0.306 | 73.281  | HEK293  |
| ZNF629  | ZSCAN21 | 9490  | 43843 | 22039 | 0.305 | 52.872  | HEK293  |
| ZSCAN30 | ZXDB    | 9511  | 26304 | 36901 | 0.305 | 51.230  | HEK293  |
| TSHZ1   | ZBTB21  | 4815  | 12240 | 20325 | 0.305 | 82.229  | HEK293  |
| KLF16   | ZNF2    | 7002  | 18018 | 29224 | 0.305 | 77.052  | HEK293  |
| KLF16   | ZNF24   | 6012  | 18018 | 21595 | 0.305 | 83.196  | HEK293  |
| ZNF292  | ZNF34   | 1338  | 1922  | 10050 | 0.304 | 127.138 | HEK293  |
| ZNF391  | ZXDB    | 6905  | 13956 | 36901 | 0.304 | 82.686  | HEK293  |
| KLF16   | ZFP69B  | 6367  | 18018 | 24305 | 0.304 | 83.569  | HEK293  |
| WT1     | ZNF24   | 7587  | 28823 | 21595 | 0.304 | 67.431  | HEK293  |
| KLF7    | ZNF324  | 4425  | 12712 | 16663 | 0.304 | 106.008 | HEK293  |
| KLF16   | ZNF843  | 6544  | 18018 | 25751 | 0.304 | 76.796  | HEK293  |
| INSM2   | KLF10   | 6043  | 17714 | 22350 | 0.304 | 76.133  | HEK293  |
| BCL11A  | KLF8    | 6497  | 14204 | 32219 | 0.304 | 77.893  | HEK293  |
| ZNF324  | ZNF76   | 5232  | 16663 | 17824 | 0.304 | 77.066  | HEK293  |
| ZNF202  | ZNF292  | 1088  | 6698  | 1922  | 0.303 | 152.044 | HEK293  |
| ZBTB21  | ZNF518A | 5898  | 20325 | 18621 | 0.303 | 85.421  | HEK293  |
| ZNF394  | ZNF623  | 6675  | 32293 | 15029 | 0.303 | 63.173  | HEK293  |
| KLF17   | KLF7    | 5804  | 28900 | 12712 | 0.303 | 68.958  | HEK293  |
| ZNF292  | ZNF530  | 631   | 1922  | 2262  | 0.303 | 113.348 | HEK293  |
| KLF10   | MAZ     | 9360  | 22350 | 42804 | 0.303 | 56.717  | HEK293  |
| ZNF391  | ZNF692  | 6664  | 13956 | 34826 | 0.302 | 74.704  | HEK293  |
| KLF10   | ZNF843  | 7251  | 22350 | 25751 | 0.302 | 80.217  | HEK293  |
| KLF8    | ZNF501  | 8144  | 32219 | 22541 | 0.302 | 67.890  | HEK293  |
| OVOL3   | PRDM4   | 4410  | 9640  | 22102 | 0.302 | 95.662  | HEK293  |
| SALL2   | ZNF148  | 963   | 2650  | 3836  | 0.302 | 113.835 | HEK293  |
| ZNF560  | ZNF680  | 1851  | 3492  | 10768 | 0.302 | 147.715 | HEK293  |
| ATF2    | ZNF629  | 11086 | 30766 | 43843 | 0.302 | 50.387  | HEK293  |
| KLF8    | WT1     | 9185  | 32219 | 28823 | 0.301 | 52.633  | HEK293  |
| ZNF138  | ZNF19   | 554   | 1647  | 2055  | 0.301 | 122.642 | HEK293  |
| ZNF555  | ZNF680  | 2558  | 6703  | 10768 | 0.301 | 121.036 | HEK293  |
| KLF10   | ZNF660  | 8095  | 22350 | 32350 | 0.301 | 66.420  | HEK293  |
| ZBTB44  | ZNF561  | 6680  | 20353 | 24194 | 0.301 | 76.391  | HEK293  |
| ZNF140  | ZNF404  | 1291  | 7978  | 2306  | 0.301 | 122.507 | HEK293  |
| ZNF610  | ZNF843  | 5880  | 14846 | 25751 | 0.301 | 84.123  | HEK293  |
| ZBTB44  | ZNF843  | 6880  | 20353 | 25751 | 0.301 | 79.586  | HEK293  |
| ZBTB21  | ZXDB    | 8230  | 20325 | 36901 | 0.301 | 55.457  | HEK293  |
| PATZ1   | ZFP69B  | 9562  | 41663 | 24305 | 0.300 | 56.205  | HEK293  |
| KLF8    | TSHZ1   | 5963  | 32219 | 12240 | 0.300 | 65.469  | HEK293  |
| ZEB2    | ZNF76   | 8028  | 40116 | 17824 | 0.300 | 69.512  | HEK293  |
| JUN     | JUND    | 18801 | 22995 | 34106 | 0.671 | 173.426 | HeLa-S3 |
| MAFF    | MAFK    | 12021 | 25547 | 16601 | 0.584 | 136.704 | HeLa-S3 |
| NFYA    | NFYB    | 4131  | 7179  | 8033  | 0.544 | 194.226 | HeLa-S3 |
| FOS     | JUN     | 7804  | 10227 | 22995 | 0.509 | 187.956 | HeLa-S3 |

|        |        |       |       |       |       |         |         |
|--------|--------|-------|-------|-------|-------|---------|---------|
| JUN    | STAT3  | 9270  | 22995 | 17088 | 0.468 | 125.151 | HeLa-S3 |
| FOS    | JUND   | 8621  | 10227 | 34106 | 0.462 | 122.582 | HeLa-S3 |
| MAX    | MYC    | 8704  | 34096 | 11821 | 0.434 | 108.792 | HeLa-S3 |
| JUND   | STAT3  | 10369 | 34106 | 17088 | 0.430 | 80.718  | HeLa-S3 |
| ELK1   | ELK4   | 2811  | 6090  | 7250  | 0.423 | 141.927 | HeLa-S3 |
| MAX    | MXI1   | 9623  | 34096 | 15255 | 0.422 | 103.843 | HeLa-S3 |
| ELK1   | GABPA  | 2819  | 6090  | 7553  | 0.416 | 111.645 | HeLa-S3 |
| ELK4   | GABPA  | 3038  | 7250  | 7553  | 0.411 | 116.017 | HeLa-S3 |
| IRF3   | NFYA   | 1425  | 1848  | 7179  | 0.391 | 126.619 | HeLa-S3 |
| IRF3   | NFYB   | 1429  | 1848  | 8033  | 0.371 | 140.041 | HeLa-S3 |
| MAX    | MAZ    | 8678  | 34096 | 16564 | 0.365 | 63.397  | HeLa-S3 |
| FOS    | STAT3  | 4697  | 10227 | 17088 | 0.355 | 93.733  | HeLa-S3 |
| MXI1   | MYC    | 4749  | 15255 | 11821 | 0.354 | 94.686  | HeLa-S3 |
| RFX5   | TBP    | 7861  | 24378 | 23581 | 0.328 | 56.083  | HeLa-S3 |
| RFX5   | STAT3  | 6581  | 24378 | 17088 | 0.322 | 51.954  | HeLa-S3 |
| FOXA1  | FOXA2  | 40029 | 58770 | 48956 | 0.746 | 61.743  | HepG2   |
| SOX13  | SOX5   | 30692 | 50089 | 41113 | 0.676 | 50.224  | HepG2   |
| NR2F6  | RARA   | 25665 | 39697 | 44851 | 0.608 | 50.925  | HepG2   |
| NFYB   | NFYC   | 9642  | 15448 | 16430 | 0.605 | 159.930 | HepG2   |
| FOXA3  | FOXP1  | 21688 | 47916 | 28473 | 0.587 | 56.148  | HepG2   |
| FOXP1  | FOXP4  | 18581 | 28473 | 35653 | 0.583 | 65.819  | HepG2   |
| JUN    | JUND   | 16036 | 18375 | 41511 | 0.581 | 72.573  | HepG2   |
| ETV4   | ETV5   | 15113 | 21788 | 32099 | 0.571 | 85.483  | HepG2   |
| HNF4A  | HNF4G  | 20715 | 53121 | 24914 | 0.569 | 64.522  | HepG2   |
| TFDP1  | TFDP2  | 12872 | 23515 | 22516 | 0.559 | 84.727  | HepG2   |
| FOXP1  | SOX5   | 19096 | 28473 | 41113 | 0.558 | 57.631  | HepG2   |
| FOXP4  | SOX5   | 21285 | 35653 | 41113 | 0.556 | 50.948  | HepG2   |
| RXR    | THRA   | 19065 | 41739 | 28190 | 0.556 | 55.849  | HepG2   |
| HMG20A | SOX5   | 18227 | 26787 | 41113 | 0.549 | 58.151  | HepG2   |
| CEBPD  | CEBPG  | 15790 | 19702 | 42425 | 0.546 | 80.301  | HepG2   |
| PPARG  | RXR    | 17984 | 26097 | 41739 | 0.545 | 57.834  | HepG2   |
| FOXP1  | SOX13  | 20539 | 28473 | 50089 | 0.544 | 51.167  | HepG2   |
| TCF7   | TCF7L2 | 14501 | 19413 | 36713 | 0.543 | 76.552  | HepG2   |
| KLF16  | THAP11 | 18357 | 30628 | 37306 | 0.543 | 51.087  | HepG2   |
| FOXP1  | HMG20A | 14762 | 28473 | 26787 | 0.535 | 70.238  | HepG2   |
| IRF2   | THAP11 | 18195 | 31142 | 37306 | 0.534 | 50.361  | HepG2   |
| ERF    | IRF2   | 16957 | 32451 | 31142 | 0.533 | 63.155  | HepG2   |
| FOXK1  | FOXO1  | 13880 | 26575 | 25752 | 0.531 | 65.333  | HepG2   |
| E2F4   | TFDP2  | 11757 | 21936 | 22516 | 0.529 | 87.141  | HepG2   |
| FOXP4  | ISL2   | 17005 | 35653 | 29175 | 0.527 | 51.977  | HepG2   |
| RXR    | ZNF331 | 19432 | 41739 | 32566 | 0.527 | 52.458  | HepG2   |
| IRF2   | RXR    | 18984 | 31142 | 41739 | 0.527 | 50.367  | HepG2   |
| FOXK1  | THAP11 | 16574 | 26575 | 37306 | 0.526 | 65.008  | HepG2   |
| FOXO1  | SMAD4  | 17992 | 25752 | 45641 | 0.525 | 52.198  | HepG2   |
| FOXO1  | FOXP4  | 15889 | 25752 | 35653 | 0.524 | 60.604  | HepG2   |
| FOXO1  | ZNF331 | 15181 | 25752 | 32566 | 0.524 | 73.343  | HepG2   |
| NFYA   | NFYC   | 8865  | 17604 | 16430 | 0.521 | 82.759  | HepG2   |
| FOXO1  | RXR    | 17049 | 25752 | 41739 | 0.520 | 53.886  | HepG2   |
| FOXO1  | LCOR   | 15984 | 25752 | 36711 | 0.520 | 60.288  | HepG2   |
| IRF2   | ZNF331 | 16484 | 31142 | 32566 | 0.518 | 59.380  | HepG2   |
| NFYA   | NFYB   | 8512  | 17604 | 15448 | 0.516 | 95.749  | HepG2   |
| FOXA3  | FOXO1  | 18097 | 47916 | 25752 | 0.515 | 50.026  | HepG2   |

|        |        |       |       |       |       |         |       |
|--------|--------|-------|-------|-------|-------|---------|-------|
| TEAD3  | TEAD4  | 16038 | 45689 | 21380 | 0.513 | 56.079  | HepG2 |
| IKZF5  | KLF16  | 15806 | 31009 | 30628 | 0.513 | 55.947  | HepG2 |
| HMG20A | TEAD1  | 15874 | 26787 | 35808 | 0.513 | 53.894  | HepG2 |
| IKZF5  | IRF2   | 15826 | 31009 | 31142 | 0.509 | 57.340  | HepG2 |
| ATF2   | THAP11 | 15110 | 23795 | 37306 | 0.507 | 52.831  | HepG2 |
| NR2F6  | THRA   | 16960 | 39697 | 28190 | 0.507 | 51.437  | HepG2 |
| ELF1   | ETV5   | 13716 | 22892 | 32099 | 0.506 | 64.266  | HepG2 |
| ERF    | RBPJ   | 15648 | 32451 | 29519 | 0.506 | 63.368  | HepG2 |
| THRA   | ZNF331 | 15296 | 28190 | 32566 | 0.505 | 61.122  | HepG2 |
| ATF2   | ZNF331 | 14004 | 23795 | 32566 | 0.503 | 60.583  | HepG2 |
| IRF2   | RBPJ   | 15223 | 31142 | 29519 | 0.502 | 52.537  | HepG2 |
| FOXX1  | IRF2   | 14436 | 26575 | 31142 | 0.502 | 59.147  | HepG2 |
| IRF2   | ZNF614 | 13969 | 31142 | 25059 | 0.500 | 57.225  | HepG2 |
| ERF    | KLF16  | 15660 | 32451 | 30628 | 0.497 | 58.645  | HepG2 |
| FOXO1  | THRA   | 13382 | 25752 | 28190 | 0.497 | 62.695  | HepG2 |
| CREB1  | CREM   | 14010 | 26848 | 29846 | 0.495 | 50.271  | HepG2 |
| SIX1   | SIX4   | 7024  | 14572 | 13829 | 0.495 | 106.576 | HepG2 |
| ATF2   | IRF2   | 13469 | 23795 | 31142 | 0.495 | 64.286  | HepG2 |
| ZNF217 | ZNF609 | 13915 | 31645 | 25025 | 0.494 | 63.644  | HepG2 |
| FOXO1  | FOXP1  | 13389 | 25752 | 28473 | 0.494 | 55.301  | HepG2 |
| IRF2   | KLF16  | 15250 | 31142 | 30628 | 0.494 | 63.354  | HepG2 |
| FOXX1  | FOXP4  | 15159 | 26575 | 35653 | 0.492 | 55.047  | HepG2 |
| ATF2   | FOXX1  | 12347 | 23795 | 26575 | 0.491 | 88.658  | HepG2 |
| ATF2   | KLF16  | 13255 | 23795 | 30628 | 0.491 | 63.838  | HepG2 |
| ISL2   | ZNF503 | 11383 | 29175 | 18529 | 0.490 | 73.894  | HepG2 |
| ERF    | ZNF792 | 13486 | 32451 | 23423 | 0.489 | 59.180  | HepG2 |
| FOXO1  | IRF2   | 13844 | 25752 | 31142 | 0.489 | 57.851  | HepG2 |
| IKZF5  | RBPJ   | 14776 | 31009 | 29519 | 0.488 | 51.777  | HepG2 |
| FOXO1  | ZNF217 | 13899 | 25752 | 31645 | 0.487 | 50.301  | HepG2 |
| SPEN   | ZNF574 | 15266 | 27137 | 36345 | 0.486 | 53.363  | HepG2 |
| ELF3   | FOXX1  | 15793 | 39910 | 26575 | 0.485 | 50.945  | HepG2 |
| IRF2   | ZNF792 | 13079 | 31142 | 23423 | 0.484 | 71.602  | HepG2 |
| ATF2   | LCOR   | 14309 | 23795 | 36711 | 0.484 | 52.564  | HepG2 |
| FOXJ3  | ISL2   | 11994 | 21114 | 29175 | 0.483 | 65.753  | HepG2 |
| ATF2   | IKZF5  | 13090 | 23795 | 31009 | 0.482 | 71.210  | HepG2 |
| ATF2   | FOXO1  | 11925 | 23795 | 25752 | 0.482 | 67.167  | HepG2 |
| NR2F6  | PPARG  | 15480 | 39697 | 26097 | 0.481 | 53.544  | HepG2 |
| ATF2   | THRA   | 12441 | 23795 | 28190 | 0.480 | 59.543  | HepG2 |
| THRA   | THRB   | 10424 | 28190 | 16710 | 0.480 | 74.858  | HepG2 |
| KLF16  | SMAD3  | 12109 | 30628 | 20760 | 0.480 | 60.981  | HepG2 |
| ELF3   | HOMEZ  | 15875 | 39910 | 27410 | 0.480 | 50.607  | HepG2 |
| FOXO1  | IKZF5  | 13558 | 25752 | 31009 | 0.480 | 50.793  | HepG2 |
| E2F4   | TFDP1  | 10871 | 21936 | 23515 | 0.479 | 59.392  | HepG2 |
| TEAD1  | TEAD4  | 13223 | 35808 | 21380 | 0.478 | 56.042  | HepG2 |
| DRAP1  | IRF2   | 13630 | 26223 | 31142 | 0.477 | 53.065  | HepG2 |
| ETV5   | FOXO1  | 13710 | 32099 | 25752 | 0.477 | 51.291  | HepG2 |
| FOXP4  | ZNF609 | 14237 | 35653 | 25025 | 0.477 | 52.430  | HepG2 |
| MLX    | TFE3   | 9343  | 16042 | 23975 | 0.476 | 83.128  | HepG2 |
| RBPJ   | ZNF614 | 12957 | 29519 | 25059 | 0.476 | 62.345  | HepG2 |
| RFX1   | RFX3   | 3160  | 6690  | 6577  | 0.476 | 110.611 | HepG2 |
| ERF    | ZNF580 | 13060 | 32451 | 23174 | 0.476 | 62.539  | HepG2 |
| MIXL1  | PPARG  | 12868 | 28115 | 26097 | 0.475 | 52.942  | HepG2 |

|        |        |       |       |       |       |        |       |
|--------|--------|-------|-------|-------|-------|--------|-------|
| ELF1   | THAP11 | 13870 | 22892 | 37306 | 0.475 | 56.524 | HepG2 |
| IRF2   | THRA   | 14059 | 31142 | 28190 | 0.474 | 52.499 | HepG2 |
| KLF16  | RBPJ   | 14156 | 30628 | 29519 | 0.471 | 54.654 | HepG2 |
| ATF2   | HOXA3  | 14561 | 23795 | 40277 | 0.470 | 58.445 | HepG2 |
| SMAD3  | THAP11 | 13059 | 20760 | 37306 | 0.469 | 53.789 | HepG2 |
| ZNF614 | ZNF792 | 11368 | 25059 | 23423 | 0.469 | 59.934 | HepG2 |
| MIXL1  | TEAD1  | 14879 | 28115 | 35808 | 0.469 | 55.955 | HepG2 |
| ERF    | ZSCAN9 | 12011 | 32451 | 20246 | 0.469 | 67.172 | HepG2 |
| ZNF331 | ZNF614 | 13384 | 32566 | 25059 | 0.469 | 53.538 | HepG2 |
| ATF2   | SMAD3  | 10399 | 23795 | 20760 | 0.468 | 68.046 | HepG2 |
| FOXX1  | FOXP1  | 12860 | 26575 | 28473 | 0.468 | 64.739 | HepG2 |
| HNF1A  | ZNF609 | 11711 | 25102 | 25025 | 0.467 | 50.833 | HepG2 |
| ATF2   | MYBL2  | 11250 | 23795 | 24417 | 0.467 | 66.398 | HepG2 |
| ERF    | ZBTB25 | 12017 | 32451 | 20508 | 0.466 | 57.707 | HepG2 |
| FOXJ3  | FOXP4  | 12779 | 21114 | 35653 | 0.466 | 54.890 | HepG2 |
| IRF2   | TFE3   | 12718 | 31142 | 23975 | 0.465 | 54.780 | HepG2 |
| ATF2   | ERF    | 12920 | 23795 | 32451 | 0.465 | 52.600 | HepG2 |
| ZNF331 | ZNF792 | 12826 | 32566 | 23423 | 0.464 | 60.230 | HepG2 |
| HOMEZ  | MIXL1  | 12883 | 27410 | 28115 | 0.464 | 58.009 | HepG2 |
| FOXP1  | TCF7   | 10887 | 28473 | 19413 | 0.463 | 82.778 | HepG2 |
| RBPJ   | ZNF792 | 12166 | 29519 | 23423 | 0.463 | 56.000 | HepG2 |
| FOXX1  | THRA   | 12661 | 26575 | 28190 | 0.463 | 55.492 | HepG2 |
| ATF2   | ISL2   | 12177 | 23795 | 29175 | 0.462 | 55.392 | HepG2 |
| ISL2   | ZNF331 | 14213 | 29175 | 32566 | 0.461 | 53.067 | HepG2 |
| FOXX1  | SMAD3  | 10824 | 26575 | 20760 | 0.461 | 64.814 | HepG2 |
| IKZF5  | SMAD3  | 11686 | 31009 | 20760 | 0.461 | 51.406 | HepG2 |
| IRF2   | SMAD3  | 11705 | 31142 | 20760 | 0.460 | 64.898 | HepG2 |
| NR2F2  | NR2F6  | 12349 | 18140 | 39697 | 0.460 | 51.729 | HepG2 |
| SMAD3  | ZNF331 | 11918 | 20760 | 32566 | 0.458 | 53.056 | HepG2 |
| ERF    | TFE3   | 12773 | 32451 | 23975 | 0.458 | 54.426 | HepG2 |
| IRF2   | ZBTB25 | 11537 | 31142 | 20508 | 0.457 | 64.028 | HepG2 |
| ATF2   | RBPJ   | 12094 | 23795 | 29519 | 0.456 | 58.775 | HepG2 |
| IRF2   | ZSCAN9 | 11443 | 31142 | 20246 | 0.456 | 50.741 | HepG2 |
| ELF1   | ETV4   | 10174 | 22892 | 21788 | 0.456 | 58.677 | HepG2 |
| ISL2   | THRA   | 13053 | 29175 | 28190 | 0.455 | 55.355 | HepG2 |
| HMG20A | TCF7   | 10378 | 26787 | 19413 | 0.455 | 63.700 | HepG2 |
| SOX5   | TFE3   | 14273 | 41113 | 23975 | 0.455 | 51.312 | HepG2 |
| KLF16  | ZBTB25 | 11389 | 30628 | 20508 | 0.454 | 64.961 | HepG2 |
| FOXJ3  | ZNF503 | 8976  | 21114 | 18529 | 0.454 | 81.682 | HepG2 |
| TFE3   | ZNF331 | 12675 | 23975 | 32566 | 0.454 | 57.864 | HepG2 |
| ERF    | ZNF511 | 10867 | 32451 | 17697 | 0.453 | 68.702 | HepG2 |
| NR2F1  | NR2F2  | 8305  | 18530 | 18140 | 0.453 | 78.258 | HepG2 |
| ZNF792 | ZSCAN9 | 9854  | 23423 | 20246 | 0.453 | 64.898 | HepG2 |
| KMT2A  | KMT2B  | 10105 | 23007 | 21702 | 0.452 | 50.703 | HepG2 |
| MIXL1  | ZNF614 | 11986 | 28115 | 25059 | 0.452 | 55.322 | HepG2 |
| IRF2   | PPARG  | 12858 | 31142 | 26097 | 0.451 | 51.277 | HepG2 |
| THAP9  | ZNF350 | 10731 | 21105 | 26991 | 0.450 | 55.816 | HepG2 |
| ATF2   | ZNF614 | 10975 | 23795 | 25059 | 0.449 | 55.708 | HepG2 |
| DLX6   | ISL2   | 10756 | 19647 | 29175 | 0.449 | 58.916 | HepG2 |
| FOXO1  | MLX    | 9092  | 25752 | 16042 | 0.447 | 64.698 | HepG2 |
| TFDP2  | THAP11 | 12964 | 22516 | 37306 | 0.447 | 50.361 | HepG2 |
| IRF2   | MYBL2  | 12330 | 31142 | 24417 | 0.447 | 56.949 | HepG2 |

|         |         |       |       |       |       |        |       |
|---------|---------|-------|-------|-------|-------|--------|-------|
| THAP11  | ZBTB25  | 12357 | 37306 | 20508 | 0.447 | 50.568 | HepG2 |
| FOXK1   | MIXL1   | 12208 | 26575 | 28115 | 0.447 | 51.547 | HepG2 |
| IKZF5   | MYBL2   | 12281 | 31009 | 24417 | 0.446 | 50.226 | HepG2 |
| IRF2    | ZNF511  | 10475 | 31142 | 17697 | 0.446 | 55.354 | HepG2 |
| E2F4    | NFYA    | 8767  | 21936 | 17604 | 0.446 | 76.636 | HepG2 |
| ZKSCAN8 | ZNF614  | 9725  | 18988 | 25059 | 0.446 | 61.977 | HepG2 |
| KLF16   | ZSCAN9  | 11101 | 30628 | 20246 | 0.446 | 56.262 | HepG2 |
| TFE3    | ZNF792  | 10561 | 23975 | 23423 | 0.446 | 53.797 | HepG2 |
| ERF     | KMT2B   | 11817 | 32451 | 21702 | 0.445 | 62.679 | HepG2 |
| FOXO1   | ZNF614  | 11309 | 25752 | 25059 | 0.445 | 51.064 | HepG2 |
| PPARG   | THRA    | 12066 | 26097 | 28190 | 0.445 | 53.019 | HepG2 |
| FOXK1   | TFE3    | 11222 | 26575 | 23975 | 0.445 | 51.732 | HepG2 |
| ZNF362  | ZNF384  | 9614  | 25385 | 18424 | 0.445 | 72.882 | HepG2 |
| DRAP1   | ZNF792  | 11012 | 26223 | 23423 | 0.444 | 62.869 | HepG2 |
| ZNF511  | ZNF792  | 9043  | 17697 | 23423 | 0.444 | 81.740 | HepG2 |
| DRAP1   | TBP     | 9716  | 26223 | 18258 | 0.444 | 70.325 | HepG2 |
| ZNF511  | ZNF614  | 9333  | 17697 | 25059 | 0.443 | 67.530 | HepG2 |
| ISL2    | MYBL2   | 11814 | 29175 | 24417 | 0.443 | 54.728 | HepG2 |
| KLF16   | KMT2B   | 11407 | 30628 | 21702 | 0.442 | 52.557 | HepG2 |
| ZNF580  | ZNF792  | 10308 | 23174 | 23423 | 0.442 | 56.258 | HepG2 |
| IRF2    | KMT2B   | 11497 | 31142 | 21702 | 0.442 | 68.430 | HepG2 |
| FOXO1   | TFE3    | 10970 | 25752 | 23975 | 0.441 | 57.707 | HepG2 |
| ATF2    | ZNF792  | 10419 | 23795 | 23423 | 0.441 | 51.022 | HepG2 |
| FOXK1   | HOMEZ   | 11902 | 26575 | 27410 | 0.441 | 58.042 | HepG2 |
| IRF2    | ZKSCAN8 | 10721 | 31142 | 18988 | 0.441 | 60.086 | HepG2 |
| ZBTB25  | ZNF614  | 9994  | 20508 | 25059 | 0.441 | 54.330 | HepG2 |
| RBPJ    | ZBTB25  | 10844 | 29519 | 20508 | 0.441 | 51.122 | HepG2 |
| CREM    | TCF7    | 10605 | 29846 | 19413 | 0.441 | 64.831 | HepG2 |
| ZNF614  | ZSCAN9  | 9908  | 25059 | 20246 | 0.440 | 51.320 | HepG2 |
| ATF2    | TFE3    | 10499 | 23795 | 23975 | 0.440 | 61.232 | HepG2 |
| ISL2    | PPARG   | 12108 | 29175 | 26097 | 0.439 | 58.201 | HepG2 |
| TFE3    | ZSCAN9  | 9663  | 23975 | 20246 | 0.439 | 59.258 | HepG2 |
| IRF2    | MLX     | 9803  | 31142 | 16042 | 0.439 | 51.178 | HepG2 |
| AHDC1   | FOXP1   | 12124 | 26848 | 28473 | 0.439 | 55.028 | HepG2 |
| HOMEZ   | PPARG   | 11727 | 27410 | 26097 | 0.438 | 50.769 | HepG2 |
| ATF2    | PPARG   | 10911 | 23795 | 26097 | 0.438 | 57.197 | HepG2 |
| ZBTB25  | ZSCAN9  | 8920  | 20508 | 20246 | 0.438 | 62.545 | HepG2 |
| KLF16   | TFE3    | 11855 | 30628 | 23975 | 0.437 | 52.764 | HepG2 |
| FOXO1   | HOMEZ   | 11616 | 25752 | 27410 | 0.437 | 55.453 | HepG2 |
| E2F1    | E2F4    | 7042  | 11827 | 21936 | 0.437 | 71.965 | HepG2 |
| FOXO1   | SMAD3   | 10107 | 25752 | 20760 | 0.437 | 52.930 | HepG2 |
| ZNF580  | ZNF614  | 10523 | 23174 | 25059 | 0.437 | 53.409 | HepG2 |
| SMAD3   | THRA    | 10561 | 20760 | 28190 | 0.437 | 54.131 | HepG2 |
| ZBTB25  | ZNF792  | 9558  | 20508 | 23423 | 0.436 | 53.705 | HepG2 |
| KLF16   | KLF6    | 10376 | 30628 | 18502 | 0.436 | 57.019 | HepG2 |
| ERF     | ZKSCAN8 | 10809 | 32451 | 18988 | 0.435 | 54.536 | HepG2 |
| TFE3    | ZNF614  | 10672 | 23975 | 25059 | 0.435 | 60.768 | HepG2 |
| ERF     | ZNF205  | 11085 | 32451 | 20027 | 0.435 | 58.382 | HepG2 |
| FOXP4   | ZNF503  | 11158 | 35653 | 18529 | 0.434 | 50.278 | HepG2 |
| ZNF511  | ZSCAN9  | 8217  | 17697 | 20246 | 0.434 | 68.249 | HepG2 |
| NRL     | ZNF891  | 8196  | 19698 | 18098 | 0.434 | 67.893 | HepG2 |
| MLX     | SOX5    | 11147 | 16042 | 41113 | 0.434 | 58.398 | HepG2 |

|         |         |       |       |       |       |        |       |
|---------|---------|-------|-------|-------|-------|--------|-------|
| MXI1    | TFDP2   | 10373 | 25399 | 22516 | 0.434 | 63.113 | HepG2 |
| FOXO1   | ZNF792  | 10628 | 25752 | 23423 | 0.433 | 53.004 | HepG2 |
| GMEB1   | SPEN    | 10477 | 21627 | 27137 | 0.432 | 57.392 | HepG2 |
| DLX6    | ZNF503  | 8251  | 19647 | 18529 | 0.432 | 66.675 | HepG2 |
| ATF2    | ZBTB25  | 9546  | 23795 | 20508 | 0.432 | 76.004 | HepG2 |
| IKZF5   | ZSCAN9  | 10826 | 31009 | 20246 | 0.432 | 51.297 | HepG2 |
| RBPJ    | ZNF511  | 9849  | 29519 | 17697 | 0.431 | 54.342 | HepG2 |
| SPEN    | TFDP2   | 10646 | 27137 | 22516 | 0.431 | 53.874 | HepG2 |
| MLX     | PPARG   | 8806  | 16042 | 26097 | 0.430 | 62.762 | HepG2 |
| MAZ     | ZSCAN31 | 10465 | 27510 | 21564 | 0.430 | 52.184 | HepG2 |
| MYBL2   | SMAD3   | 9673  | 24417 | 20760 | 0.430 | 57.389 | HepG2 |
| TFE3    | THRA    | 11161 | 23975 | 28190 | 0.429 | 50.135 | HepG2 |
| FOXO1   | RREB1   | 10347 | 25752 | 22566 | 0.429 | 53.865 | HepG2 |
| LCOR    | SMAD3   | 11839 | 36711 | 20760 | 0.429 | 52.107 | HepG2 |
| DRAP1   | FOXK1   | 11311 | 26223 | 26575 | 0.428 | 51.557 | HepG2 |
| THRA    | ZNF614  | 11382 | 28190 | 25059 | 0.428 | 54.580 | HepG2 |
| RBPJ    | ZKSCAN8 | 10134 | 29519 | 18988 | 0.428 | 63.247 | HepG2 |
| MIXL1   | TFE3    | 11108 | 28115 | 23975 | 0.428 | 56.109 | HepG2 |
| ELF1    | FOXK1   | 10551 | 22892 | 26575 | 0.428 | 63.828 | HepG2 |
| FOXK1   | MLX     | 8832  | 26575 | 16042 | 0.428 | 64.956 | HepG2 |
| ZNF205  | ZNF792  | 9264  | 20027 | 23423 | 0.428 | 58.641 | HepG2 |
| ATF2    | MLX     | 8349  | 23795 | 16042 | 0.427 | 69.153 | HepG2 |
| FOXJ3   | FOXP1   | 10476 | 21114 | 28473 | 0.427 | 52.774 | HepG2 |
| MLX     | ZNF331  | 9761  | 16042 | 32566 | 0.427 | 68.970 | HepG2 |
| FOXP4   | TCF7    | 11234 | 35653 | 19413 | 0.427 | 54.705 | HepG2 |
| ZKSCAN8 | ZNF792  | 9004  | 18988 | 23423 | 0.427 | 54.521 | HepG2 |
| GMEB1   | TFDP2   | 9419  | 21627 | 22516 | 0.427 | 53.629 | HepG2 |
| ZNF205  | ZNF614  | 9562  | 20027 | 25059 | 0.427 | 53.575 | HepG2 |
| KMT2B   | MXD4    | 9361  | 21702 | 22169 | 0.427 | 54.906 | HepG2 |
| ZBTB25  | ZNF511  | 8126  | 20508 | 17697 | 0.427 | 62.676 | HepG2 |
| NRL     | ZNF280B | 7494  | 19698 | 15695 | 0.426 | 73.671 | HepG2 |
| ATF2    | ZSCAN9  | 9353  | 23795 | 20246 | 0.426 | 60.518 | HepG2 |
| ERF     | KLF6    | 10439 | 32451 | 18502 | 0.426 | 59.693 | HepG2 |
| MIXL1   | MLX     | 9041  | 28115 | 16042 | 0.426 | 57.712 | HepG2 |
| SP1     | SP5     | 8544  | 16039 | 25217 | 0.425 | 51.180 | HepG2 |
| IKZF5   | ZBTB25  | 10711 | 31009 | 20508 | 0.425 | 56.403 | HepG2 |
| SMAD3   | ZNF614  | 9672  | 20760 | 25059 | 0.424 | 54.859 | HepG2 |
| KMT2B   | ZBTB25  | 8946  | 21702 | 20508 | 0.424 | 58.876 | HepG2 |
| ATF2    | DRAP1   | 10586 | 23795 | 26223 | 0.424 | 53.390 | HepG2 |
| MYBL2   | TFDP2   | 9925  | 24417 | 22516 | 0.423 | 55.320 | HepG2 |
| MLX     | ZNF614  | 8483  | 16042 | 25059 | 0.423 | 64.194 | HepG2 |
| SMAD3   | ZBTB25  | 8722  | 20760 | 20508 | 0.423 | 63.101 | HepG2 |
| GMEB1   | KMT2B   | 9145  | 21627 | 21702 | 0.422 | 57.748 | HepG2 |
| HOMEZ   | ZNF644  | 10858 | 27410 | 24199 | 0.422 | 52.256 | HepG2 |
| RBPJ    | SMAD3   | 10435 | 29519 | 20760 | 0.422 | 53.166 | HepG2 |
| MLX     | ZNF792  | 8170  | 16042 | 23423 | 0.421 | 65.996 | HepG2 |
| ATF1    | CREB1   | 8166  | 13987 | 26848 | 0.421 | 72.151 | HepG2 |
| SMAD3   | ZSCAN9  | 8628  | 20760 | 20246 | 0.421 | 59.294 | HepG2 |
| HMG20A  | MLX     | 8724  | 26787 | 16042 | 0.421 | 66.337 | HepG2 |
| ZKSCAN8 | ZSCAN9  | 8245  | 18988 | 20246 | 0.421 | 64.090 | HepG2 |
| FOXO1   | MYBL2   | 10540 | 25752 | 24417 | 0.420 | 50.336 | HepG2 |
| MLX     | RBPJ    | 9141  | 16042 | 29519 | 0.420 | 52.820 | HepG2 |



|         |         |       |       |       |       |        |       |
|---------|---------|-------|-------|-------|-------|--------|-------|
| ATF2    | ZNF511  | 8617  | 23795 | 17697 | 0.420 | 59.850 | HepG2 |
| KMT2B   | ZNF580  | 9407  | 21702 | 23174 | 0.419 | 68.524 | HepG2 |
| KDM5B   | MXD1    | 9550  | 28623 | 18125 | 0.419 | 59.947 | HepG2 |
| ATF1    | CREM    | 8563  | 13987 | 29846 | 0.419 | 66.726 | HepG2 |
| MIXL1   | ZKSCAN8 | 9683  | 28115 | 18988 | 0.419 | 60.733 | HepG2 |
| MIXL1   | SMAD3   | 10118 | 28115 | 20760 | 0.419 | 51.088 | HepG2 |
| GMEB1   | PHF20   | 8174  | 21627 | 17625 | 0.419 | 58.746 | HepG2 |
| ZKSCAN8 | ZNF511  | 7673  | 18988 | 17697 | 0.419 | 72.727 | HepG2 |
| ZNF503  | ZNF609  | 9011  | 18529 | 25025 | 0.418 | 52.818 | HepG2 |
| KMT2B   | ZNF792  | 9433  | 21702 | 23423 | 0.418 | 56.347 | HepG2 |
| TFE3    | ZNF511  | 8609  | 23975 | 17697 | 0.418 | 65.636 | HepG2 |
| ZBTB25  | ZNF580  | 9107  | 20508 | 23174 | 0.418 | 56.679 | HepG2 |
| DLX6    | FOXJ3   | 8506  | 19647 | 21114 | 0.418 | 54.908 | HepG2 |
| KLF16   | ZNF511  | 9718  | 30628 | 17697 | 0.417 | 51.706 | HepG2 |
| KLF6    | KMT2B   | 8364  | 18502 | 21702 | 0.417 | 54.768 | HepG2 |
| DRAP1   | ELF1    | 10222 | 26223 | 22892 | 0.417 | 56.176 | HepG2 |
| ZNF580  | ZSCAN9  | 9027  | 23174 | 20246 | 0.417 | 50.599 | HepG2 |
| ATF2    | ZNF609  | 10163 | 23795 | 25025 | 0.416 | 57.501 | HepG2 |
| ATF2    | HOMEZ   | 10620 | 23795 | 27410 | 0.416 | 50.278 | HepG2 |
| MIXL1   | ZSCAN9  | 9920  | 28115 | 20246 | 0.416 | 51.313 | HepG2 |
| KLF6    | ZBTB25  | 8099  | 18502 | 20508 | 0.416 | 61.230 | HepG2 |
| NFYA    | SP1     | 6978  | 17604 | 16039 | 0.415 | 86.287 | HepG2 |
| ATF2    | ZKSCAN8 | 8822  | 23795 | 18988 | 0.415 | 66.871 | HepG2 |
| IKZF5   | MLX     | 9251  | 31009 | 16042 | 0.415 | 66.055 | HepG2 |
| ISL2    | TCF7    | 9870  | 29175 | 19413 | 0.415 | 58.441 | HepG2 |
| ARNTL   | ZNF609  | 9359  | 20368 | 25025 | 0.415 | 64.607 | HepG2 |
| ATF2    | ZNF124  | 8091  | 23795 | 16017 | 0.414 | 60.149 | HepG2 |
| ZKSCAN8 | ZNF331  | 10297 | 18988 | 32566 | 0.414 | 62.671 | HepG2 |
| FOXJ3   | FOXO1   | 9655  | 21114 | 25752 | 0.414 | 55.397 | HepG2 |
| ELF1    | KLF16   | 10962 | 22892 | 30628 | 0.414 | 55.395 | HepG2 |
| HMG20B  | MLX     | 6126  | 13676 | 16042 | 0.414 | 69.174 | HepG2 |
| SMAD3   | ZNF792  | 9120  | 20760 | 23423 | 0.414 | 52.544 | HepG2 |
| DRAP1   | SP1     | 8478  | 26223 | 16039 | 0.413 | 54.681 | HepG2 |
| IKZF5   | ZKSCAN8 | 10031 | 31009 | 18988 | 0.413 | 51.828 | HepG2 |
| KLF16   | ZNF124  | 9155  | 30628 | 16017 | 0.413 | 77.988 | HepG2 |
| FOXO1   | ZKSCAN8 | 9137  | 25752 | 18988 | 0.413 | 53.229 | HepG2 |
| CREM    | NFIC    | 9365  | 29846 | 17240 | 0.413 | 51.513 | HepG2 |
| KMT2B   | TFDP2   | 9126  | 21702 | 22516 | 0.413 | 61.632 | HepG2 |
| HOXA5   | ISL2    | 10193 | 20899 | 29175 | 0.413 | 55.082 | HepG2 |
| DRAP1   | ZNF511  | 8891  | 26223 | 17697 | 0.413 | 53.639 | HepG2 |
| ZBTB25  | ZNF639  | 6846  | 20508 | 13418 | 0.413 | 76.872 | HepG2 |
| ATF2    | SIX4    | 7483  | 23795 | 13829 | 0.413 | 70.846 | HepG2 |
| SMAD3   | TFE3    | 9201  | 20760 | 23975 | 0.412 | 52.266 | HepG2 |
| FOXJ3   | HMG20A  | 9798  | 21114 | 26787 | 0.412 | 52.003 | HepG2 |
| SP1     | TFDP2   | 7824  | 16039 | 22516 | 0.412 | 51.813 | HepG2 |
| MXI1    | SP1     | 8308  | 25399 | 16039 | 0.412 | 72.874 | HepG2 |
| MLX     | THRA    | 8753  | 16042 | 28190 | 0.412 | 50.802 | HepG2 |
| E2F4    | GMEB1   | 8959  | 21936 | 21627 | 0.411 | 63.681 | HepG2 |
| MXD4    | ZNF580  | 9318  | 22169 | 23174 | 0.411 | 52.585 | HepG2 |
| PPARG   | ZKSCAN8 | 9140  | 26097 | 18988 | 0.411 | 57.055 | HepG2 |
| DLX6    | MIXL1   | 9649  | 19647 | 28115 | 0.411 | 52.448 | HepG2 |
| HMG20A  | HMG20B  | 7857  | 26787 | 13676 | 0.411 | 62.196 | HepG2 |

|        |         |       |       |       |       |        |       |
|--------|---------|-------|-------|-------|-------|--------|-------|
| ZNF205 | ZSCAN9  | 8264  | 20027 | 20246 | 0.410 | 52.568 | HepG2 |
| KLF6   | ZSCAN9  | 7942  | 18502 | 20246 | 0.410 | 53.834 | HepG2 |
| ATF2   | HNF1A   | 10026 | 23795 | 25102 | 0.410 | 51.791 | HepG2 |
| IKZF5  | ZNF124  | 9123  | 31009 | 16017 | 0.409 | 54.512 | HepG2 |
| MLX    | THAP11  | 10004 | 16042 | 37306 | 0.409 | 56.230 | HepG2 |
| ZBTB25 | ZKSCAN8 | 8056  | 20508 | 18988 | 0.408 | 56.149 | HepG2 |
| HOMEZ  | MLX     | 8560  | 27410 | 16042 | 0.408 | 67.367 | HepG2 |
| E2F4   | SP1     | 7655  | 21936 | 16039 | 0.408 | 57.090 | HepG2 |
| MLX    | ZKSCAN8 | 7120  | 16042 | 18988 | 0.408 | 70.488 | HepG2 |
| ZNF205 | ZNF580  | 8781  | 20027 | 23174 | 0.408 | 62.816 | HepG2 |
| FOXO1  | HMG20B  | 7647  | 25752 | 13676 | 0.407 | 52.382 | HepG2 |
| ZNF511 | ZNF580  | 8240  | 17697 | 23174 | 0.407 | 58.517 | HepG2 |
| ETV5   | MLX     | 9229  | 32099 | 16042 | 0.407 | 54.950 | HepG2 |
| ZBTB25 | ZNF205  | 8238  | 20508 | 20027 | 0.406 | 58.972 | HepG2 |
| DRAP1  | TFDP2   | 9874  | 26223 | 22516 | 0.406 | 53.926 | HepG2 |
| KMT2B  | MYBL2   | 9354  | 21702 | 24417 | 0.406 | 55.156 | HepG2 |
| ATF2   | ZNF205  | 8870  | 23795 | 20027 | 0.406 | 66.553 | HepG2 |
| NR2F2  | ZNF609  | 8649  | 18140 | 25025 | 0.406 | 50.277 | HepG2 |
| ZNF205 | ZNF511  | 7627  | 20027 | 17697 | 0.405 | 57.302 | HepG2 |
| FOXO1  | SIX4    | 7644  | 25752 | 13829 | 0.405 | 68.347 | HepG2 |
| PHF20  | SPEN    | 8854  | 17625 | 27137 | 0.405 | 65.034 | HepG2 |
| MLX    | ZNF511  | 6820  | 16042 | 17697 | 0.405 | 68.836 | HepG2 |
| MLX    | ZNF609  | 8107  | 16042 | 25025 | 0.405 | 59.324 | HepG2 |
| MLX    | ZNF217  | 9114  | 16042 | 31645 | 0.405 | 51.223 | HepG2 |
| FOXX1  | ZKSCAN8 | 9081  | 26575 | 18988 | 0.404 | 50.400 | HepG2 |
| MLX    | ZSCAN9  | 7285  | 16042 | 20246 | 0.404 | 71.621 | HepG2 |
| NFYA   | TFDP2   | 8044  | 17604 | 22516 | 0.404 | 56.310 | HepG2 |
| IKZF5  | ZNF205  | 10067 | 31009 | 20027 | 0.404 | 50.325 | HepG2 |
| DRAP1  | MLX     | 8281  | 26223 | 16042 | 0.404 | 58.241 | HepG2 |
| FOXP1  | MLX     | 8626  | 28473 | 16042 | 0.404 | 50.126 | HepG2 |
| TFE3   | ZKSCAN8 | 8608  | 23975 | 18988 | 0.403 | 53.712 | HepG2 |
| KMT2B  | ZNF511  | 7906  | 21702 | 17697 | 0.403 | 59.908 | HepG2 |
| DLX6   | ZNF264  | 7717  | 19647 | 18666 | 0.403 | 62.584 | HepG2 |
| ZNF264 | ZNF503  | 7486  | 18666 | 18529 | 0.403 | 56.463 | HepG2 |
| HOXD1  | MEIS2   | 6853  | 13879 | 20907 | 0.402 | 57.617 | HepG2 |
| ATF2   | ELF1    | 9389  | 23795 | 22892 | 0.402 | 53.650 | HepG2 |
| SMAD3  | ZNF511  | 7709  | 20760 | 17697 | 0.402 | 57.999 | HepG2 |
| DRAP1  | ZBTB25  | 9324  | 26223 | 20508 | 0.402 | 53.456 | HepG2 |
| SMAD3  | ZKSCAN8 | 7982  | 20760 | 18988 | 0.402 | 58.574 | HepG2 |
| KLF16  | MLX     | 8905  | 30628 | 16042 | 0.402 | 51.827 | HepG2 |
| NFIC   | TCF7    | 7336  | 17240 | 19413 | 0.401 | 62.053 | HepG2 |
| DRAP1  | ZNF580  | 9877  | 26223 | 23174 | 0.401 | 55.314 | HepG2 |
| PPARG  | ZNF511  | 8607  | 26097 | 17697 | 0.401 | 56.922 | HepG2 |
| DRAP1  | NFYC    | 8311  | 26223 | 16430 | 0.400 | 53.978 | HepG2 |
| FOXX1  | SIX4    | 7672  | 26575 | 13829 | 0.400 | 65.602 | HepG2 |
| ATF3   | FOSL1   | 4655  | 15603 | 8676  | 0.400 | 77.954 | HepG2 |
| NR2F2  | TCF7    | 7502  | 18140 | 19413 | 0.400 | 73.219 | HepG2 |
| KMT2B  | PHF20   | 7810  | 21702 | 17625 | 0.399 | 56.290 | HepG2 |
| FOXP1  | NR2F2   | 9075  | 28473 | 18140 | 0.399 | 53.629 | HepG2 |
| MLX    | SP5     | 8030  | 16042 | 25217 | 0.399 | 55.770 | HepG2 |
| KLF6   | ZNF792  | 8310  | 18502 | 23423 | 0.399 | 53.133 | HepG2 |
| ATF2   | ATF3    | 7691  | 23795 | 15603 | 0.399 | 60.456 | HepG2 |

|         |         |       |       |       |       |        |       |
|---------|---------|-------|-------|-------|-------|--------|-------|
| KLF6    | ZNF580  | 8261  | 18502 | 23174 | 0.399 | 52.425 | HepG2 |
| PPARG   | ZSCAN9  | 9169  | 26097 | 20246 | 0.399 | 53.010 | HepG2 |
| GMEB1   | NR2C2   | 10331 | 21627 | 31046 | 0.399 | 52.297 | HepG2 |
| MXD4    | ZNF792  | 9080  | 22169 | 23423 | 0.398 | 59.076 | HepG2 |
| TFE3    | ZNF580  | 9391  | 23975 | 23174 | 0.398 | 55.512 | HepG2 |
| MXD1    | ZNF776  | 6191  | 18125 | 13339 | 0.398 | 71.679 | HepG2 |
| KLF6    | MXD4    | 8063  | 18502 | 22169 | 0.398 | 53.980 | HepG2 |
| ELF1    | KMT2B   | 8873  | 22892 | 21702 | 0.398 | 53.586 | HepG2 |
| FOXJ3   | ZNF609  | 9145  | 21114 | 25025 | 0.398 | 57.206 | HepG2 |
| E2F4    | SPEN    | 9702  | 21936 | 27137 | 0.398 | 57.619 | HepG2 |
| ATF2    | HMG20B  | 7173  | 23795 | 13676 | 0.398 | 54.066 | HepG2 |
| MXD3    | NFKB2   | 7836  | 17726 | 21911 | 0.398 | 66.199 | HepG2 |
| E2F1    | TFDP2   | 6488  | 11827 | 22516 | 0.398 | 61.172 | HepG2 |
| GMEB1   | NFYA    | 7756  | 21627 | 17604 | 0.397 | 54.041 | HepG2 |
| SP1     | TFDP1   | 7719  | 16039 | 23515 | 0.397 | 58.453 | HepG2 |
| NFYA    | SP2     | 5602  | 17604 | 11297 | 0.397 | 56.791 | HepG2 |
| SMAD3   | ZNF124  | 7243  | 20760 | 16017 | 0.397 | 63.454 | HepG2 |
| HMG20B  | PPARG   | 7501  | 13676 | 26097 | 0.397 | 66.929 | HepG2 |
| SIX4    | THRA    | 7831  | 13829 | 28190 | 0.397 | 63.620 | HepG2 |
| ATF2    | SP5     | 9709  | 23795 | 25217 | 0.396 | 50.107 | HepG2 |
| ZNF280B | ZNF891  | 6674  | 15695 | 18098 | 0.396 | 64.366 | HepG2 |
| GMEB1   | SP1     | 7353  | 21627 | 16039 | 0.395 | 71.598 | HepG2 |
| MXD4    | ZBTB25  | 8415  | 22169 | 20508 | 0.395 | 57.635 | HepG2 |
| HMG20A  | SIX1    | 7793  | 26787 | 14572 | 0.394 | 57.897 | HepG2 |
| THRA    | ZKSCAN8 | 9123  | 28190 | 18988 | 0.394 | 53.177 | HepG2 |
| KMT2A   | TFDP2   | 8969  | 23007 | 22516 | 0.394 | 51.770 | HepG2 |
| ATF2    | ZNF503  | 8268  | 23795 | 18529 | 0.394 | 51.293 | HepG2 |
| ISL2    | MLX     | 8517  | 29175 | 16042 | 0.394 | 51.009 | HepG2 |
| ZKSCAN8 | ZNF205  | 7674  | 18988 | 20027 | 0.394 | 63.499 | HepG2 |
| MLX     | SMAD3   | 7177  | 16042 | 20760 | 0.393 | 69.900 | HepG2 |
| ISL2    | SIX1    | 8107  | 29175 | 14572 | 0.393 | 57.196 | HepG2 |
| HMG20B  | THRA    | 7693  | 13676 | 28190 | 0.392 | 57.111 | HepG2 |
| HMG20B  | MIXL1   | 7678  | 13676 | 28115 | 0.392 | 62.553 | HepG2 |
| HMG20B  | TFE3    | 7089  | 13676 | 23975 | 0.391 | 68.908 | HepG2 |
| FOXP1   | NFIC    | 8669  | 28473 | 17240 | 0.391 | 61.469 | HepG2 |
| HMG20B  | LCOR    | 8765  | 13676 | 36711 | 0.391 | 51.329 | HepG2 |
| ZFP1    | ZNF614  | 7313  | 13958 | 25059 | 0.391 | 61.833 | HepG2 |
| HMG20B  | ZNF614  | 7235  | 13676 | 25059 | 0.391 | 60.796 | HepG2 |
| HMG20B  | ZNF792  | 6991  | 13676 | 23423 | 0.391 | 50.846 | HepG2 |
| MLX     | MYBL2   | 7723  | 16042 | 24417 | 0.390 | 50.215 | HepG2 |
| ISL2    | ZSCAN9  | 9474  | 29175 | 20246 | 0.390 | 53.232 | HepG2 |
| MXI1    | NFYA    | 8242  | 25399 | 17604 | 0.390 | 50.296 | HepG2 |
| HMG20B  | IRF2    | 8035  | 13676 | 31142 | 0.389 | 52.522 | HepG2 |
| ZKSCAN8 | ZNF580  | 8164  | 18988 | 23174 | 0.389 | 60.816 | HepG2 |
| GATA4   | ISL2    | 7834  | 13900 | 29175 | 0.389 | 53.714 | HepG2 |
| ISL2    | SIX4    | 7813  | 29175 | 13829 | 0.389 | 50.685 | HepG2 |
| ZNF124  | ZNF792  | 7531  | 16017 | 23423 | 0.389 | 56.701 | HepG2 |
| MXD4    | ZSCAN9  | 8213  | 22169 | 20246 | 0.388 | 50.069 | HepG2 |
| ATF2    | ZBED4   | 7693  | 23795 | 16556 | 0.388 | 51.736 | HepG2 |
| ZFP1    | ZKSCAN8 | 6309  | 13958 | 18988 | 0.388 | 64.147 | HepG2 |
| ARNTL   | ZNF556  | 7820  | 20368 | 20009 | 0.387 | 54.332 | HepG2 |
| HOMEZ   | ZSCAN9  | 9124  | 27410 | 20246 | 0.387 | 51.550 | HepG2 |

|        |         |      |       |       |       |        |       |
|--------|---------|------|-------|-------|-------|--------|-------|
| THRA   | ZNF511  | 8649 | 28190 | 17697 | 0.387 | 53.213 | HepG2 |
| KLF16  | ZNF335  | 8360 | 30628 | 15231 | 0.387 | 51.482 | HepG2 |
| HOXA3  | ZHX2    | 8026 | 40277 | 10676 | 0.387 | 53.797 | HepG2 |
| MLX    | ZBTB25  | 7017 | 16042 | 20508 | 0.387 | 54.952 | HepG2 |
| ZNF274 | ZNF547  | 7148 | 17918 | 19097 | 0.386 | 55.822 | HepG2 |
| RBPJ   | ZNF124  | 8391 | 29519 | 16017 | 0.386 | 51.075 | HepG2 |
| FOXJ3  | NFIC    | 7355 | 21114 | 17240 | 0.386 | 53.270 | HepG2 |
| ZFP1   | ZNF511  | 6058 | 13958 | 17697 | 0.385 | 70.627 | HepG2 |
| IRF2   | ZFP1    | 8034 | 31142 | 13958 | 0.385 | 56.628 | HepG2 |
| SIX4   | SMAD3   | 6528 | 13829 | 20760 | 0.385 | 57.746 | HepG2 |
| HOXA5  | MEIS2   | 8046 | 20899 | 20907 | 0.385 | 54.908 | HepG2 |
| PPARG  | ZBTB25  | 8904 | 26097 | 20508 | 0.385 | 51.090 | HepG2 |
| ZFP1   | ZSCAN9  | 6470 | 13958 | 20246 | 0.385 | 66.338 | HepG2 |
| KLF6   | SMAD3   | 7543 | 18502 | 20760 | 0.385 | 53.580 | HepG2 |
| MLX    | ZNF205  | 6896 | 16042 | 20027 | 0.385 | 62.751 | HepG2 |
| ZFP1   | ZNF792  | 6951 | 13958 | 23423 | 0.384 | 52.672 | HepG2 |
| KMT2B  | ZNF639  | 6559 | 21702 | 13418 | 0.384 | 63.480 | HepG2 |
| FOXP1  | TBX3    | 8011 | 28473 | 15274 | 0.384 | 54.110 | HepG2 |
| ARNTL  | MLX     | 6942 | 20368 | 16042 | 0.384 | 60.502 | HepG2 |
| HHEX   | TBX3    | 4287 | 8174  | 15274 | 0.384 | 76.463 | HepG2 |
| HOXA5  | HOXD1   | 6534 | 20899 | 13879 | 0.384 | 58.060 | HepG2 |
| SP1    | SPEN    | 7996 | 16039 | 27137 | 0.383 | 56.962 | HepG2 |
| ZNF556 | ZNF691  | 7508 | 20009 | 19190 | 0.383 | 55.494 | HepG2 |
| MXD4   | ZNF511  | 7588 | 22169 | 17697 | 0.383 | 50.292 | HepG2 |
| HOXD1  | ZNF503  | 6135 | 13879 | 18529 | 0.383 | 61.640 | HepG2 |
| HBP1   | TGIF2   | 6837 | 15317 | 20855 | 0.383 | 51.777 | HepG2 |
| KLF6   | ZNF511  | 6921 | 18502 | 17697 | 0.382 | 79.297 | HepG2 |
| HOXD1  | ISL2    | 7695 | 13879 | 29175 | 0.382 | 52.413 | HepG2 |
| MLX    | SIX4    | 5691 | 16042 | 13829 | 0.382 | 70.910 | HepG2 |
| ZNF124 | ZNF580  | 7360 | 16017 | 23174 | 0.382 | 53.056 | HepG2 |
| GMEB1  | GMEB2   | 4104 | 21627 | 5338  | 0.382 | 88.806 | HepG2 |
| GMEB1  | TFDP1   | 8608 | 21627 | 23515 | 0.382 | 50.006 | HepG2 |
| FOXK1  | HMG20B  | 7276 | 26575 | 13676 | 0.382 | 59.864 | HepG2 |
| KLF6   | ZNF614  | 8217 | 18502 | 25059 | 0.382 | 55.970 | HepG2 |
| KMT2B  | ZNF205  | 7955 | 21702 | 20027 | 0.382 | 50.773 | HepG2 |
| HMG20B | ZKSCAN8 | 6147 | 13676 | 18988 | 0.381 | 69.303 | HepG2 |
| FOXO1  | ZNF511  | 8139 | 25752 | 17697 | 0.381 | 51.154 | HepG2 |
| MLX    | ZFP1    | 5704 | 16042 | 13958 | 0.381 | 65.036 | HepG2 |
| ATF2   | KLF6    | 7998 | 23795 | 18502 | 0.381 | 58.333 | HepG2 |
| KMT2A  | ZNF580  | 8800 | 23007 | 23174 | 0.381 | 50.381 | HepG2 |
| NR2F2  | THRA    | 8617 | 18140 | 28190 | 0.381 | 50.362 | HepG2 |
| FOXJ3  | MYBL2   | 8652 | 21114 | 24417 | 0.381 | 53.258 | HepG2 |
| ZBTB26 | ZNF580  | 7508 | 16775 | 23174 | 0.381 | 50.777 | HepG2 |
| FOXP1  | SIX1    | 7750 | 28473 | 14572 | 0.380 | 51.059 | HepG2 |
| KLF6   | TFE3    | 8011 | 18502 | 23975 | 0.380 | 51.754 | HepG2 |
| SMAD3  | ZNF205  | 7739 | 20760 | 20027 | 0.380 | 55.034 | HepG2 |
| MYBL2  | ZKSCAN8 | 8169 | 24417 | 18988 | 0.379 | 50.787 | HepG2 |
| NFYB   | SP2     | 5007 | 15448 | 11297 | 0.379 | 74.848 | HepG2 |
| ATF2   | ZFP1    | 6906 | 23795 | 13958 | 0.379 | 52.593 | HepG2 |
| MIXL1  | SIX1    | 7670 | 28115 | 14572 | 0.379 | 50.279 | HepG2 |
| MEIS2  | ZNF503  | 7457 | 20907 | 18529 | 0.379 | 55.449 | HepG2 |
| HMG20B | SIX4    | 5208 | 13676 | 13829 | 0.379 | 75.582 | HepG2 |

|        |        |      |       |       |       |        |       |
|--------|--------|------|-------|-------|-------|--------|-------|
| PPARG  | ZNF503 | 8327 | 26097 | 18529 | 0.379 | 50.617 | HepG2 |
| MLX    | PITX1  | 8206 | 16042 | 29314 | 0.378 | 63.082 | HepG2 |
| HMG20B | ZSCAN9 | 6293 | 13676 | 20246 | 0.378 | 59.035 | HepG2 |
| PPARG  | SIX1   | 7373 | 26097 | 14572 | 0.378 | 58.279 | HepG2 |
| HMG20B | SMAD3  | 6370 | 13676 | 20760 | 0.378 | 58.976 | HepG2 |
| MXD1   | MXD3   | 6773 | 18125 | 17726 | 0.378 | 63.235 | HepG2 |
| ERF    | ZBTB26 | 8802 | 32451 | 16775 | 0.377 | 58.575 | HepG2 |
| ZNF124 | ZSCAN9 | 6791 | 16017 | 20246 | 0.377 | 55.171 | HepG2 |
| ZNF639 | ZNF792 | 6685 | 13418 | 23423 | 0.377 | 50.820 | HepG2 |
| FOXO1  | SIX1   | 7296 | 25752 | 14572 | 0.377 | 55.123 | HepG2 |
| HNF4G  | NR2F2  | 8005 | 24914 | 18140 | 0.377 | 52.178 | HepG2 |
| MYBL2  | SIX4   | 6907 | 24417 | 13829 | 0.376 | 52.955 | HepG2 |
| KLF6   | ZNF639 | 5921 | 18502 | 13418 | 0.376 | 76.981 | HepG2 |
| NFIC   | NR2F2  | 6643 | 17240 | 18140 | 0.376 | 60.235 | HepG2 |
| HMG20B | ZNF511 | 5839 | 13676 | 17697 | 0.375 | 64.807 | HepG2 |
| ZBTB25 | ZFP1   | 6349 | 20508 | 13958 | 0.375 | 57.284 | HepG2 |
| TBX3   | ZNF609 | 7334 | 15274 | 25025 | 0.375 | 54.707 | HepG2 |
| ERF    | HMG20B | 7900 | 32451 | 13676 | 0.375 | 50.968 | HepG2 |
| ELF1   | SP1    | 7177 | 22892 | 16039 | 0.375 | 55.916 | HepG2 |
| SIX4   | TFE3   | 6806 | 13829 | 23975 | 0.374 | 61.831 | HepG2 |
| HMG20B | IKZF5  | 7692 | 13676 | 31009 | 0.374 | 50.792 | HepG2 |
| ZNF547 | ZNF784 | 6256 | 19097 | 14697 | 0.373 | 64.976 | HepG2 |
| FOXJ3  | TCF7   | 7559 | 21114 | 19413 | 0.373 | 50.434 | HepG2 |
| HMG20B | ZNF503 | 5942 | 13676 | 18529 | 0.373 | 59.895 | HepG2 |
| FOXK1  | ZNF124 | 7698 | 26575 | 16017 | 0.373 | 54.422 | HepG2 |
| ZIK1   | ZNF451 | 4430 | 10981 | 12838 | 0.373 | 79.976 | HepG2 |
| KLF6   | ZNF205 | 7182 | 18502 | 20027 | 0.373 | 51.238 | HepG2 |
| HHEX   | ZNF609 | 5331 | 8174  | 25025 | 0.373 | 75.948 | HepG2 |
| KLF6   | MXD3   | 6742 | 18502 | 17726 | 0.372 | 58.806 | HepG2 |
| SMAD3  | ZBED4  | 6896 | 20760 | 16556 | 0.372 | 56.178 | HepG2 |
| IRF2   | ZNF335 | 8099 | 31142 | 15231 | 0.372 | 56.283 | HepG2 |
| GMEB1  | ZHX2   | 5646 | 21627 | 10676 | 0.372 | 62.009 | HepG2 |
| ZBTB25 | ZNF124 | 6732 | 20508 | 16017 | 0.371 | 66.326 | HepG2 |
| NFYC   | SP2    | 5060 | 16430 | 11297 | 0.371 | 77.358 | HepG2 |
| MLX    | ZNF503 | 6395 | 16042 | 18529 | 0.371 | 64.863 | HepG2 |
| ZNF124 | ZNF511 | 6244 | 16017 | 17697 | 0.371 | 50.880 | HepG2 |
| ATF2   | ETV4   | 8440 | 23795 | 21788 | 0.371 | 50.243 | HepG2 |
| SMAD3  | ZNF503 | 7269 | 20760 | 18529 | 0.371 | 59.266 | HepG2 |
| RBPJ   | ZNF639 | 7375 | 29519 | 13418 | 0.371 | 54.949 | HepG2 |
| DLX6   | HOXD1  | 6117 | 19647 | 13879 | 0.370 | 57.273 | HepG2 |
| CREM   | SIX1   | 7719 | 29846 | 14572 | 0.370 | 50.321 | HepG2 |
| SMAD3  | ZFP1   | 6297 | 20760 | 13958 | 0.370 | 50.146 | HepG2 |
| HMG20B | ZBTB25 | 6192 | 13676 | 20508 | 0.370 | 61.650 | HepG2 |
| HOXA5  | NKX3-1 | 6125 | 20899 | 13144 | 0.370 | 61.945 | HepG2 |
| FOXP1  | HHEX   | 5632 | 28473 | 8174  | 0.369 | 56.322 | HepG2 |
| NFYC   | SP1    | 5992 | 16430 | 16039 | 0.369 | 60.867 | HepG2 |
| ZBED4  | ZNF580 | 7222 | 16556 | 23174 | 0.369 | 54.317 | HepG2 |
| ATF2   | ZNF335 | 7019 | 23795 | 15231 | 0.369 | 55.918 | HepG2 |
| FOXJ3  | NR2F2  | 7214 | 21114 | 18140 | 0.369 | 52.154 | HepG2 |
| TFE3   | ZFP1   | 6740 | 23975 | 13958 | 0.368 | 59.338 | HepG2 |
| HHEX   | TCF7   | 4640 | 8174  | 19413 | 0.368 | 69.093 | HepG2 |
| MYBL2  | NFYA   | 7634 | 24417 | 17604 | 0.368 | 50.015 | HepG2 |

|        |        |      |       |       |       |        |       |
|--------|--------|------|-------|-------|-------|--------|-------|
| ETV4   | GATA4  | 6400 | 21788 | 13900 | 0.368 | 51.132 | HepG2 |
| NKX3-1 | ZNF232 | 5412 | 13144 | 16478 | 0.368 | 63.769 | HepG2 |
| HMG20B | ZFP1   | 5077 | 13676 | 13958 | 0.367 | 65.248 | HepG2 |
| MIXL1  | ZFP1   | 7279 | 28115 | 13958 | 0.367 | 53.347 | HepG2 |
| FOXO1  | TCF7   | 8215 | 25752 | 19413 | 0.367 | 50.987 | HepG2 |
| ZBED4  | ZNF792 | 7235 | 16556 | 23423 | 0.367 | 52.886 | HepG2 |
| KMT2B  | ZNF335 | 6678 | 21702 | 15231 | 0.367 | 50.412 | HepG2 |
| MEIS2  | ZNF264 | 7254 | 20907 | 18666 | 0.367 | 52.842 | HepG2 |
| NKX3-1 | ZNF503 | 5727 | 13144 | 18529 | 0.367 | 57.391 | HepG2 |
| GATA4  | ZNF503 | 5882 | 13900 | 18529 | 0.367 | 53.795 | HepG2 |
| MXD4   | ZNF639 | 6321 | 22169 | 13418 | 0.366 | 50.307 | HepG2 |
| AHR    | MXD3   | 5368 | 12116 | 17726 | 0.366 | 59.745 | HepG2 |
| FOXJ3  | GATA2  | 7928 | 21114 | 22221 | 0.366 | 50.441 | HepG2 |
| MLX    | ZNF580 | 7048 | 16042 | 23174 | 0.366 | 50.245 | HepG2 |
| ZNF511 | ZNF639 | 5624 | 17697 | 13418 | 0.365 | 61.622 | HepG2 |
| KMT2B  | MXD3   | 7153 | 21702 | 17726 | 0.365 | 60.522 | HepG2 |
| GATA4  | ZNF609 | 6801 | 13900 | 25025 | 0.365 | 54.923 | HepG2 |
| ZNF580 | ZNF639 | 6421 | 23174 | 13418 | 0.364 | 55.069 | HepG2 |
| HOXD1  | NKX3-1 | 4911 | 13879 | 13144 | 0.364 | 67.414 | HepG2 |
| MEF2D  | MLX    | 6969 | 22926 | 16042 | 0.363 | 68.213 | HepG2 |
| SIX4   | ZNF503 | 5815 | 13829 | 18529 | 0.363 | 55.770 | HepG2 |
| SIX1   | ZNF503 | 5968 | 14572 | 18529 | 0.363 | 64.697 | HepG2 |
| ZNF124 | ZNF205 | 6500 | 16017 | 20027 | 0.363 | 54.499 | HepG2 |
| ZNF205 | ZNF639 | 5940 | 20027 | 13418 | 0.362 | 60.925 | HepG2 |
| FOXP1  | ZNF335 | 7271 | 26575 | 15231 | 0.361 | 50.726 | HepG2 |
| ZBED4  | ZNF124 | 5884 | 16556 | 16017 | 0.361 | 62.284 | HepG2 |
| HIVEP1 | MXD1   | 6466 | 17669 | 18125 | 0.361 | 59.276 | HepG2 |
| TFDP2  | ZNF124 | 6856 | 22516 | 16017 | 0.361 | 61.439 | HepG2 |
| ETV4   | MLX    | 6747 | 21788 | 16042 | 0.361 | 51.953 | HepG2 |
| MXD1   | NFKB2  | 7188 | 18125 | 21911 | 0.361 | 59.410 | HepG2 |
| HHEX   | NR2F2  | 4384 | 8174  | 18140 | 0.360 | 62.319 | HepG2 |
| SIX4   | ZNF614 | 6702 | 13829 | 25059 | 0.360 | 54.985 | HepG2 |
| HNF1A  | SIX4   | 6706 | 25102 | 13829 | 0.360 | 53.828 | HepG2 |
| ZBED4  | ZBTB25 | 6630 | 16556 | 20508 | 0.360 | 50.722 | HepG2 |
| RBPJ   | SIX4   | 7250 | 29519 | 13829 | 0.359 | 53.609 | HepG2 |
| KLF11  | KMT2B  | 5835 | 12213 | 21702 | 0.358 | 57.595 | HepG2 |
| HMG20B | SIX1   | 5058 | 13676 | 14572 | 0.358 | 57.560 | HepG2 |
| ZBED4  | ZSCAN9 | 6559 | 16556 | 20246 | 0.358 | 55.112 | HepG2 |
| ZFP1   | ZNF205 | 5983 | 13958 | 20027 | 0.358 | 60.310 | HepG2 |
| MYBL2  | ZBED4  | 7194 | 24417 | 16556 | 0.358 | 55.064 | HepG2 |
| ZNF232 | ZNF766 | 5241 | 16478 | 13024 | 0.358 | 64.243 | HepG2 |
| ELF1   | GABPA  | 4897 | 22892 | 8201  | 0.357 | 86.064 | HepG2 |
| ARNTL  | ESRRA  | 7087 | 20368 | 19314 | 0.357 | 66.153 | HepG2 |
| HMG20B | HOMEZ  | 6918 | 13676 | 27410 | 0.357 | 54.648 | HepG2 |
| HES4   | ZNF446 | 4055 | 13098 | 9839  | 0.357 | 68.445 | HepG2 |
| TFE3   | ZNF503 | 7526 | 23975 | 18529 | 0.357 | 54.736 | HepG2 |
| ZBTB26 | ZSCAN9 | 6577 | 16775 | 20246 | 0.357 | 52.423 | HepG2 |
| HMG20B | MYBL2  | 6521 | 13676 | 24417 | 0.357 | 51.169 | HepG2 |
| TBX3   | TCF7   | 6143 | 15274 | 19413 | 0.357 | 56.953 | HepG2 |
| FOXO1  | ZFP1   | 6760 | 25752 | 13958 | 0.357 | 50.736 | HepG2 |
| KLF16  | ZNF639 | 7227 | 30628 | 13418 | 0.356 | 52.451 | HepG2 |
| ATF3   | FOXO1  | 7144 | 15603 | 25752 | 0.356 | 51.515 | HepG2 |

|        |         |      |       |       |       |         |       |
|--------|---------|------|-------|-------|-------|---------|-------|
| KLF11  | ZNF511  | 5239 | 12213 | 17697 | 0.356 | 57.169  | HepG2 |
| MLX    | SIX1    | 5448 | 16042 | 14572 | 0.356 | 61.178  | HepG2 |
| MYBL2  | ZFP1    | 6578 | 24417 | 13958 | 0.356 | 60.931  | HepG2 |
| ZNF639 | ZSCAN9  | 5872 | 13418 | 20246 | 0.356 | 61.375  | HepG2 |
| HHEX   | HMG20A  | 5271 | 8174  | 26787 | 0.356 | 52.311  | HepG2 |
| ZNF343 | ZNF543  | 5526 | 13429 | 17952 | 0.356 | 51.313  | HepG2 |
| SP1    | SP2     | 4790 | 16039 | 11297 | 0.356 | 77.423  | HepG2 |
| ZNF483 | ZNF556  | 6547 | 16926 | 20009 | 0.356 | 52.446  | HepG2 |
| HINFP  | ZNF556  | 6007 | 14261 | 20009 | 0.356 | 53.211  | HepG2 |
| TFE3   | ZNF124  | 6966 | 23975 | 16017 | 0.355 | 50.187  | HepG2 |
| TFDP1  | ZNF639  | 6314 | 23515 | 13418 | 0.355 | 56.484  | HepG2 |
| FOXK1  | FOXK2   | 6014 | 26575 | 10775 | 0.355 | 50.715  | HepG2 |
| MBD1   | TGIF2   | 6316 | 15149 | 20855 | 0.355 | 61.691  | HepG2 |
| FOXK1  | ZBED4   | 7442 | 26575 | 16556 | 0.355 | 53.155  | HepG2 |
| HINFP  | ZNF691  | 5866 | 14261 | 19190 | 0.355 | 54.118  | HepG2 |
| KLF6   | ZNF124  | 6103 | 18502 | 16017 | 0.355 | 62.298  | HepG2 |
| IRF5   | TIGD6   | 4390 | 11111 | 13801 | 0.355 | 60.832  | HepG2 |
| KMT2B  | ZKSCAN8 | 7191 | 21702 | 18988 | 0.354 | 54.302  | HepG2 |
| SIX4   | ZKSCAN8 | 5734 | 13829 | 18988 | 0.354 | 53.710  | HepG2 |
| ZNF548 | ZNF556  | 5974 | 14256 | 20009 | 0.354 | 59.924  | HepG2 |
| HHEX   | HMG20B  | 3734 | 8174  | 13676 | 0.353 | 81.188  | HepG2 |
| HOXD1  | ZNF232  | 5339 | 13879 | 16478 | 0.353 | 65.678  | HepG2 |
| ATF2   | ETS1    | 5249 | 23795 | 9307  | 0.353 | 56.237  | HepG2 |
| GMEB1  | ZNF143  | 6153 | 21627 | 14071 | 0.353 | 52.460  | HepG2 |
| SIX4   | ZSCAN9  | 5889 | 13829 | 20246 | 0.352 | 61.770  | HepG2 |
| KMT2B  | ZHX2    | 5357 | 21702 | 10676 | 0.352 | 63.627  | HepG2 |
| ZFP37  | ZNF232  | 4443 | 9678  | 16478 | 0.352 | 68.041  | HepG2 |
| E2F4   | KLF12   | 6392 | 21936 | 15074 | 0.352 | 58.051  | HepG2 |
| ZNF232 | ZNF264  | 6161 | 16478 | 18666 | 0.351 | 50.632  | HepG2 |
| TFDP2  | ZNF639  | 6104 | 22516 | 13418 | 0.351 | 58.831  | HepG2 |
| ATF2   | GATA4   | 6382 | 23795 | 13900 | 0.351 | 50.430  | HepG2 |
| SIX1   | TCF7    | 5900 | 14572 | 19413 | 0.351 | 61.204  | HepG2 |
| KLF11  | ZSCAN9  | 5514 | 12213 | 20246 | 0.351 | 62.043  | HepG2 |
| ZNF335 | ZSCAN9  | 6155 | 15231 | 20246 | 0.351 | 53.916  | HepG2 |
| SPEN   | TIGD6   | 6783 | 27137 | 13801 | 0.350 | 56.820  | HepG2 |
| ATF2   | ZHX2    | 5583 | 23795 | 10676 | 0.350 | 54.193  | HepG2 |
| SP1    | YY1     | 6759 | 16039 | 23215 | 0.350 | 52.201  | HepG2 |
| SAFB2  | TIGD6   | 4492 | 11917 | 13801 | 0.350 | 61.752  | HepG2 |
| SP1    | ZHX2    | 4582 | 16039 | 10676 | 0.350 | 68.439  | HepG2 |
| SIX4   | ZNF511  | 5475 | 13829 | 17697 | 0.350 | 68.410  | HepG2 |
| HES4   | ZNF709  | 5290 | 13098 | 17451 | 0.350 | 59.391  | HepG2 |
| MXD3   | ZNF639  | 5393 | 17726 | 13418 | 0.350 | 60.462  | HepG2 |
| NFYB   | SP1     | 5501 | 15448 | 16039 | 0.349 | 53.609  | HepG2 |
| FOXJ3  | MLX     | 6425 | 21114 | 16042 | 0.349 | 51.211  | HepG2 |
| ZNF230 | ZNF556  | 6140 | 15509 | 20009 | 0.349 | 65.118  | HepG2 |
| FOXK1  | ZHX2    | 5866 | 26575 | 10676 | 0.348 | 58.153  | HepG2 |
| ZBTB26 | ZNF205  | 6376 | 16775 | 20027 | 0.348 | 52.635  | HepG2 |
| DLX6   | ZKSCAN8 | 6705 | 19647 | 18988 | 0.347 | 52.061  | HepG2 |
| E2F1   | GMEB1   | 5544 | 11827 | 21627 | 0.347 | 54.805  | HepG2 |
| KLF11  | ZBTB25  | 5485 | 12213 | 20508 | 0.347 | 59.797  | HepG2 |
| HMG20B | NR2F2   | 5458 | 13676 | 18140 | 0.347 | 67.137  | HepG2 |
| NFE2   | NFE2L2  | 2094 | 3508  | 10434 | 0.346 | 114.129 | HepG2 |

|        |        |      |       |       |       |         |       |
|--------|--------|------|-------|-------|-------|---------|-------|
| GMEB1  | ZNF639 | 5894 | 21627 | 13418 | 0.346 | 55.852  | HepG2 |
| HOXA5  | ZNF766 | 5706 | 20899 | 13024 | 0.346 | 60.663  | HepG2 |
| FOXJ3  | HMG20B | 5871 | 21114 | 13676 | 0.345 | 62.429  | HepG2 |
| KLF6   | ZBED4  | 6037 | 18502 | 16556 | 0.345 | 60.837  | HepG2 |
| ZIK1   | ZNF616 | 3422 | 10981 | 8986  | 0.344 | 79.525  | HepG2 |
| YY1    | ZHX2   | 5418 | 23215 | 10676 | 0.344 | 64.458  | HepG2 |
| ELK1   | HOXD1  | 3997 | 9720  | 13879 | 0.344 | 69.976  | HepG2 |
| KLF11  | ZNF792 | 5819 | 12213 | 23423 | 0.344 | 51.478  | HepG2 |
| NFYC   | TFDP2  | 6611 | 16430 | 22516 | 0.344 | 51.016  | HepG2 |
| ZNF333 | ZNF776 | 4160 | 10988 | 13339 | 0.344 | 73.891  | HepG2 |
| DLX6   | NKX3-1 | 5521 | 19647 | 13144 | 0.344 | 52.524  | HepG2 |
| HMG20B | RREB1  | 6032 | 13676 | 22566 | 0.343 | 51.868  | HepG2 |
| DRAP1  | ZFP1   | 6568 | 26223 | 13958 | 0.343 | 52.932  | HepG2 |
| GABPA  | PHF20  | 4127 | 8201  | 17625 | 0.343 | 59.940  | HepG2 |
| NKX3-1 | SATB2  | 3514 | 13144 | 8020  | 0.342 | 74.703  | HepG2 |
| MXI1   | ZHX2   | 5633 | 25399 | 10676 | 0.342 | 51.694  | HepG2 |
| ZNF483 | ZNF543 | 5957 | 16926 | 17952 | 0.342 | 50.040  | HepG2 |
| KLF6   | ZBTB26 | 6020 | 18502 | 16775 | 0.342 | 52.220  | HepG2 |
| HOXA5  | KLF12  | 6065 | 20899 | 15074 | 0.342 | 51.149  | HepG2 |
| MXD1   | ZNF333 | 4821 | 18125 | 10988 | 0.342 | 57.167  | HepG2 |
| DLX6   | SIX1   | 5780 | 19647 | 14572 | 0.342 | 62.352  | HepG2 |
| KLF11  | KLF6   | 5133 | 12213 | 18502 | 0.341 | 56.759  | HepG2 |
| ZNF335 | ZNF511 | 5604 | 15231 | 17697 | 0.341 | 63.850  | HepG2 |
| PHF20  | ZHX2   | 4681 | 17625 | 10676 | 0.341 | 68.149  | HepG2 |
| MLX    | ZNF124 | 5470 | 16042 | 16017 | 0.341 | 67.386  | HepG2 |
| ZBTB26 | ZNF511 | 5879 | 16775 | 17697 | 0.341 | 51.759  | HepG2 |
| E2F1   | KLF12  | 4555 | 11827 | 15074 | 0.341 | 58.617  | HepG2 |
| AHR    | ZBTB26 | 4862 | 12116 | 16775 | 0.341 | 55.177  | HepG2 |
| ZNF124 | ZNF335 | 5326 | 16017 | 15231 | 0.341 | 54.524  | HepG2 |
| ZNF230 | ZNF543 | 5684 | 15509 | 17952 | 0.341 | 52.965  | HepG2 |
| ZNF451 | ZNF616 | 3656 | 12838 | 8986  | 0.340 | 76.847  | HepG2 |
| ZNF274 | ZNF33B | 4714 | 17918 | 10715 | 0.340 | 57.754  | HepG2 |
| ETS1   | FOKK1  | 5350 | 9307  | 26575 | 0.340 | 50.155  | HepG2 |
| DR1    | GMEB1  | 5132 | 10534 | 21627 | 0.340 | 61.969  | HepG2 |
| ARNTL  | HINFP  | 5794 | 20368 | 14261 | 0.340 | 55.540  | HepG2 |
| KLF11  | MXD4   | 5588 | 12213 | 22169 | 0.340 | 56.472  | HepG2 |
| KMT2B  | MLX    | 6327 | 21702 | 16042 | 0.339 | 51.783  | HepG2 |
| NKX3-1 | ZNF766 | 4435 | 13144 | 13024 | 0.339 | 61.792  | HepG2 |
| DR1    | TBP    | 4697 | 10534 | 18258 | 0.339 | 68.891  | HepG2 |
| CEBPZ  | IRF3   | 200  | 491   | 712   | 0.338 | 124.587 | HepG2 |
| ELK1   | ZFP37  | 3280 | 9720  | 9678  | 0.338 | 90.422  | HepG2 |
| ZFP37  | ZNF557 | 3077 | 9678  | 8561  | 0.338 | 87.314  | HepG2 |
| ZNF446 | ZNF709 | 4426 | 9839  | 17451 | 0.338 | 73.649  | HepG2 |
| ZNF142 | ZNF766 | 4683 | 14794 | 13024 | 0.337 | 61.582  | HepG2 |
| KLF11  | ZNF580 | 5675 | 12213 | 23174 | 0.337 | 51.383  | HepG2 |
| ELK1   | ZNF232 | 4269 | 9720  | 16478 | 0.337 | 57.342  | HepG2 |
| ZNF230 | ZNF548 | 5015 | 15509 | 14256 | 0.337 | 61.541  | HepG2 |
| KLF6   | ZNF335 | 5659 | 18502 | 15231 | 0.337 | 52.259  | HepG2 |
| MEIS2  | NKX3-1 | 5586 | 20907 | 13144 | 0.337 | 54.519  | HepG2 |
| ZNF230 | ZNF343 | 4861 | 15509 | 13429 | 0.337 | 60.179  | HepG2 |
| HBP1   | KMT2B  | 6141 | 15317 | 21702 | 0.337 | 52.341  | HepG2 |
| GMEB1  | SP2    | 5262 | 21627 | 11297 | 0.337 | 51.895  | HepG2 |



|        |        |      |       |       |       |        |       |
|--------|--------|------|-------|-------|-------|--------|-------|
| TFDP2  | ZHX2   | 5219 | 22516 | 10676 | 0.337 | 51.826 | HepG2 |
| E2F4   | SP2    | 5295 | 21936 | 11297 | 0.336 | 52.203 | HepG2 |
| FOXJ3  | TBX3   | 6039 | 21114 | 15274 | 0.336 | 50.474 | HepG2 |
| E2F4   | ZNF143 | 5903 | 21936 | 14071 | 0.336 | 50.634 | HepG2 |
| MEF2A  | SMAD3  | 4501 | 8647  | 20760 | 0.336 | 62.370 | HepG2 |
| ATF2   | MEF2A  | 4817 | 23795 | 8647  | 0.336 | 54.831 | HepG2 |
| NFAT5  | ZNF773 | 2628 | 9150  | 6695  | 0.336 | 90.991 | HepG2 |
| TBX3   | ZNF503 | 5648 | 15274 | 18529 | 0.336 | 50.820 | HepG2 |
| NFIC   | SIX1   | 5321 | 17240 | 14572 | 0.336 | 51.216 | HepG2 |
| GATA4  | SIX4   | 4650 | 13900 | 13829 | 0.335 | 51.055 | HepG2 |
| MEIS2  | ZNF766 | 5531 | 20907 | 13024 | 0.335 | 52.997 | HepG2 |
| ZNF33B | ZNF547 | 4794 | 10715 | 19097 | 0.335 | 55.113 | HepG2 |
| ZFP1   | ZNF124 | 5010 | 13958 | 16017 | 0.335 | 57.047 | HepG2 |
| GATA4  | MLX    | 5002 | 13900 | 16042 | 0.335 | 53.578 | HepG2 |
| MXD3   | ZNF451 | 5052 | 17726 | 12838 | 0.335 | 63.928 | HepG2 |
| IKZF4  | ZNF274 | 4433 | 9788  | 17918 | 0.335 | 64.526 | HepG2 |
| PHF20  | SP1    | 5627 | 17625 | 16039 | 0.335 | 61.171 | HepG2 |
| EEA1   | IRF5   | 3399 | 9299  | 11111 | 0.334 | 68.825 | HepG2 |
| NFAT5  | ZNF232 | 4106 | 9150  | 16478 | 0.334 | 58.193 | HepG2 |
| IKZF4  | ZNF547 | 4571 | 9788  | 19097 | 0.334 | 73.208 | HepG2 |
| ZNF232 | ZNF557 | 3970 | 16478 | 8561  | 0.334 | 71.709 | HepG2 |
| HHEX   | ZNF503 | 4105 | 8174  | 18529 | 0.334 | 75.158 | HepG2 |
| GMEB2  | ZHX2   | 2517 | 5338  | 10676 | 0.333 | 73.268 | HepG2 |
| GMEB2  | SP1    | 3084 | 5338  | 16039 | 0.333 | 58.882 | HepG2 |
| IRF5   | SAFB2  | 3833 | 11111 | 11917 | 0.333 | 58.399 | HepG2 |
| SIX4   | ZNF124 | 4956 | 13829 | 16017 | 0.333 | 56.689 | HepG2 |
| GATA4  | HMG20B | 4586 | 13900 | 13676 | 0.333 | 53.875 | HepG2 |
| FOXO1  | HHEX   | 4825 | 25752 | 8174  | 0.333 | 54.223 | HepG2 |
| NR2F2  | TBX3   | 5529 | 18140 | 15274 | 0.332 | 50.963 | HepG2 |
| FOXP4  | HHEX   | 5664 | 35653 | 8174  | 0.332 | 50.538 | HepG2 |
| MLX    | TBX3   | 5190 | 16042 | 15274 | 0.332 | 50.736 | HepG2 |
| HMG20B | TBX3   | 4790 | 13676 | 15274 | 0.331 | 54.695 | HepG2 |
| E2F1   | NFYA   | 4774 | 11827 | 17604 | 0.331 | 66.214 | HepG2 |
| DR1    | E2F1   | 3689 | 10534 | 11827 | 0.331 | 61.673 | HepG2 |
| DR1    | DRAP1  | 5491 | 10534 | 26223 | 0.330 | 50.614 | HepG2 |
| KLF12  | ZNF766 | 4625 | 15074 | 13024 | 0.330 | 57.222 | HepG2 |
| ZNF230 | ZNF483 | 5345 | 15509 | 16926 | 0.330 | 52.581 | HepG2 |
| ZNF543 | ZNF548 | 5273 | 17952 | 14256 | 0.330 | 51.312 | HepG2 |
| HHEX   | TCF7L2 | 5709 | 8174  | 36713 | 0.330 | 53.042 | HepG2 |
| DZIP1  | NRL    | 4446 | 9278  | 19698 | 0.329 | 64.804 | HepG2 |
| CAMTA2 | ZNF776 | 3447 | 8249  | 13339 | 0.329 | 86.500 | HepG2 |
| HHEX   | SIX1   | 3583 | 8174  | 14572 | 0.328 | 60.881 | HepG2 |
| KLF9   | ZNF511 | 4017 | 8472  | 17697 | 0.328 | 74.373 | HepG2 |
| NFYA   | ZNF143 | 5163 | 17604 | 14071 | 0.328 | 57.911 | HepG2 |
| ATF3   | ETS1   | 3950 | 15603 | 9307  | 0.328 | 58.597 | HepG2 |
| ATF2   | HBP1   | 6252 | 23795 | 15317 | 0.327 | 50.801 | HepG2 |
| PHF20  | ZNF143 | 5157 | 17625 | 14071 | 0.327 | 53.246 | HepG2 |
| ZBED4  | ZNF639 | 4870 | 16556 | 13418 | 0.327 | 61.843 | HepG2 |
| HOXD1  | ZNF766 | 4388 | 13879 | 13024 | 0.326 | 50.984 | HepG2 |
| ATF2   | ZBTB21 | 4935 | 23795 | 9611  | 0.326 | 63.248 | HepG2 |
| AHR    | MXD4   | 5344 | 12116 | 22169 | 0.326 | 50.628 | HepG2 |
| GATA4  | TBP    | 5193 | 13900 | 18258 | 0.326 | 53.405 | HepG2 |

|         |         |      |       |       |       |        |       |
|---------|---------|------|-------|-------|-------|--------|-------|
| MXD3    | ZIK1    | 4541 | 17726 | 10981 | 0.325 | 55.013 | HepG2 |
| MEF2A   | ZNF503  | 4119 | 8647  | 18529 | 0.325 | 51.585 | HepG2 |
| HMG20B  | ZNF124  | 4813 | 13676 | 16017 | 0.325 | 64.412 | HepG2 |
| HOXD1   | ZFP37   | 3767 | 13879 | 9678  | 0.325 | 70.139 | HepG2 |
| NKX3-1  | ZNF557  | 3447 | 13144 | 8561  | 0.325 | 66.713 | HepG2 |
| AHR     | ZNF639  | 4143 | 12116 | 13418 | 0.325 | 69.576 | HepG2 |
| NFYA    | ZHX2    | 4451 | 17604 | 10676 | 0.325 | 59.488 | HepG2 |
| GLI4    | ZNF547  | 4584 | 10442 | 19097 | 0.325 | 61.148 | HepG2 |
| ETS1    | MLX     | 3965 | 9307  | 16042 | 0.324 | 51.837 | HepG2 |
| DRAP1   | ZHX2    | 5428 | 26223 | 10676 | 0.324 | 56.600 | HepG2 |
| HBP1    | MBD1    | 4940 | 15317 | 15149 | 0.324 | 50.920 | HepG2 |
| ELK1    | ZNF557  | 2956 | 9720  | 8561  | 0.324 | 54.308 | HepG2 |
| ARNTL   | ATF7    | 4813 | 20368 | 10839 | 0.324 | 55.718 | HepG2 |
| ZNF343  | ZNF483  | 4882 | 13429 | 16926 | 0.324 | 53.230 | HepG2 |
| E2F1    | HOXA5   | 5089 | 11827 | 20899 | 0.324 | 50.694 | HepG2 |
| MEIS2   | ZFP37   | 4602 | 20907 | 9678  | 0.324 | 50.643 | HepG2 |
| SIX1    | ZFP1    | 4612 | 14572 | 13958 | 0.323 | 51.200 | HepG2 |
| ZBTB26  | ZNF639  | 4851 | 16775 | 13418 | 0.323 | 56.839 | HepG2 |
| AHR     | KLF6    | 4840 | 12116 | 18502 | 0.323 | 56.970 | HepG2 |
| HINFP   | ZNF548  | 4609 | 14261 | 14256 | 0.323 | 55.938 | HepG2 |
| ZNF343  | ZNF548  | 4470 | 13429 | 14256 | 0.323 | 55.345 | HepG2 |
| HHEX    | NFIC    | 3834 | 8174  | 17240 | 0.323 | 58.818 | HepG2 |
| ZNF25   | ZNF781  | 3066 | 7096  | 12710 | 0.323 | 63.016 | HepG2 |
| ZNF230  | ZNF782  | 4346 | 15509 | 11685 | 0.323 | 53.659 | HepG2 |
| ZNF230  | ZNF276  | 4159 | 15509 | 10710 | 0.323 | 56.849 | HepG2 |
| HOXD1   | ZNF557  | 3516 | 13879 | 8561  | 0.323 | 73.392 | HepG2 |
| GATA4   | SIX1    | 4585 | 13900 | 14572 | 0.322 | 52.067 | HepG2 |
| ZNF230  | ZNF510  | 4179 | 15509 | 10854 | 0.322 | 53.685 | HepG2 |
| MEF2A   | SIX1    | 3615 | 8647  | 14572 | 0.322 | 76.635 | HepG2 |
| LBX2    | ZNF616  | 2558 | 7038  | 8986  | 0.322 | 65.977 | HepG2 |
| ZNF124  | ZNF639  | 4708 | 16017 | 13418 | 0.321 | 55.166 | HepG2 |
| ZKSCAN8 | ZNF639  | 5122 | 18988 | 13418 | 0.321 | 50.129 | HepG2 |
| NFAT5   | ZNF766  | 3500 | 9150  | 13024 | 0.321 | 61.135 | HepG2 |
| ZNF343  | ZNF556  | 5253 | 13429 | 20009 | 0.320 | 51.987 | HepG2 |
| HBP1    | ZNF580  | 6031 | 15317 | 23174 | 0.320 | 50.457 | HepG2 |
| ZNF142  | ZNF232  | 4998 | 14794 | 16478 | 0.320 | 53.405 | HepG2 |
| MEF2A   | SIX4    | 3500 | 8647  | 13829 | 0.320 | 64.477 | HepG2 |
| KLF11   | TFE3    | 5476 | 12213 | 23975 | 0.320 | 57.753 | HepG2 |
| HMG20B  | ZNF264  | 5111 | 13676 | 18666 | 0.320 | 50.046 | HepG2 |
| ETS1    | HNF4G   | 4868 | 9307  | 24914 | 0.320 | 51.936 | HepG2 |
| ELK1    | HOXA5   | 4556 | 9720  | 20899 | 0.320 | 58.113 | HepG2 |
| ELK1    | ZNF264  | 4304 | 9720  | 18666 | 0.320 | 53.514 | HepG2 |
| SP1     | ZNF639  | 4687 | 16039 | 13418 | 0.319 | 62.165 | HepG2 |
| HMG20B  | KLF6    | 5080 | 13676 | 18502 | 0.319 | 53.640 | HepG2 |
| PRDM10  | ZKSCAN8 | 5883 | 17873 | 18988 | 0.319 | 56.383 | HepG2 |
| DR1     | PHF20   | 4346 | 10534 | 17625 | 0.319 | 53.933 | HepG2 |
| HMG20B  | THRB    | 4820 | 13676 | 16710 | 0.319 | 51.433 | HepG2 |
| ZNF691  | ZNF782  | 4774 | 19190 | 11685 | 0.319 | 53.505 | HepG2 |
| EEA1    | TIGD6   | 3608 | 9299  | 13801 | 0.318 | 57.739 | HepG2 |
| E2F1    | ZNF766  | 3950 | 11827 | 13024 | 0.318 | 62.518 | HepG2 |
| ZHX2    | ZHX3    | 2701 | 10676 | 6761  | 0.318 | 70.702 | HepG2 |
| MXD1    | ZNF451  | 4849 | 18125 | 12838 | 0.318 | 53.473 | HepG2 |

|         |         |      |       |       |       |        |       |
|---------|---------|------|-------|-------|-------|--------|-------|
| PHF20   | ZNF639  | 4885 | 17625 | 13418 | 0.318 | 50.680 | HepG2 |
| MEF2A   | MLX     | 3739 | 8647  | 16042 | 0.317 | 67.286 | HepG2 |
| E2F1    | PHF20   | 4583 | 11827 | 17625 | 0.317 | 57.700 | HepG2 |
| ETS1    | TBX3    | 3781 | 9307  | 15274 | 0.317 | 54.382 | HepG2 |
| MLX     | TCF12   | 2722 | 16042 | 4594  | 0.317 | 73.993 | HepG2 |
| DR1     | NFYA    | 4314 | 10534 | 17604 | 0.317 | 56.524 | HepG2 |
| PHF20   | SP2     | 4470 | 17625 | 11297 | 0.317 | 53.902 | HepG2 |
| KLF11   | ZNF639  | 4055 | 12213 | 13418 | 0.317 | 61.443 | HepG2 |
| ELK1    | NKX3-1  | 3580 | 9720  | 13144 | 0.317 | 67.220 | HepG2 |
| KLF12   | ZNF142  | 4727 | 15074 | 14794 | 0.317 | 50.745 | HepG2 |
| NFAT5   | NKX3-1  | 3471 | 9150  | 13144 | 0.317 | 56.497 | HepG2 |
| CAMTA2  | ZNF333  | 3012 | 8249  | 10988 | 0.316 | 59.008 | HepG2 |
| MLX     | ZNF335  | 4944 | 16042 | 15231 | 0.316 | 58.082 | HepG2 |
| HHEX    | MLX     | 3621 | 8174  | 16042 | 0.316 | 53.919 | HepG2 |
| E2F1    | NKX3-1  | 3939 | 11827 | 13144 | 0.316 | 51.279 | HepG2 |
| MEF2A   | MEF2D   | 4445 | 8647  | 22926 | 0.316 | 54.367 | HepG2 |
| NCOA1   | ZNF414  | 4333 | 11085 | 16996 | 0.316 | 51.705 | HepG2 |
| ZNF483  | ZNF548  | 4900 | 16926 | 14256 | 0.315 | 50.730 | HepG2 |
| GMEB2   | KMT2B   | 3392 | 5338  | 21702 | 0.315 | 62.145 | HepG2 |
| ZNF548  | ZNF782  | 4067 | 14256 | 11685 | 0.315 | 67.457 | HepG2 |
| ZFP1    | ZNF639  | 4311 | 13958 | 13418 | 0.315 | 58.678 | HepG2 |
| NR2F2   | SIX4    | 4989 | 18140 | 13829 | 0.315 | 55.530 | HepG2 |
| ETS1    | SMAD3   | 4377 | 9307  | 20760 | 0.315 | 52.076 | HepG2 |
| DZIP1   | ZNF280B | 3786 | 9278  | 15695 | 0.314 | 50.154 | HepG2 |
| ZNF335  | ZNF639  | 4482 | 15231 | 13418 | 0.314 | 56.668 | HepG2 |
| ZBTB44  | ZHX3    | 1872 | 5276  | 6761  | 0.313 | 72.010 | HepG2 |
| HOXD1   | KLF12   | 4532 | 13879 | 15074 | 0.313 | 56.190 | HepG2 |
| ZNF510  | ZNF543  | 4370 | 10854 | 17952 | 0.313 | 51.707 | HepG2 |
| MXD1    | ZIK1    | 4414 | 18125 | 10981 | 0.313 | 59.418 | HepG2 |
| SMAD1   | ZNF619  | 3622 | 11315 | 11856 | 0.313 | 62.668 | HepG2 |
| E2F1    | KMT2B   | 5010 | 11827 | 21702 | 0.313 | 55.596 | HepG2 |
| HINFP   | ZNF276  | 3864 | 14261 | 10710 | 0.313 | 59.538 | HepG2 |
| KMT2A   | ZHX2    | 4894 | 23007 | 10676 | 0.312 | 51.546 | HepG2 |
| E2F4    | GMEB2   | 3378 | 21936 | 5338  | 0.312 | 68.351 | HepG2 |
| FOXJ3   | MEF2A   | 4217 | 21114 | 8647  | 0.312 | 57.707 | HepG2 |
| MEF2A   | ZKSCAN8 | 3994 | 8647  | 18988 | 0.312 | 56.088 | HepG2 |
| HINFP   | ZNF782  | 4022 | 14261 | 11685 | 0.312 | 67.328 | HepG2 |
| MLXIP   | NKX3-1  | 2649 | 5502  | 13144 | 0.311 | 65.247 | HepG2 |
| ZNF280B | ZNF485  | 3762 | 15695 | 9308  | 0.311 | 65.411 | HepG2 |
| ZNF343  | ZNF510  | 3757 | 13429 | 10854 | 0.311 | 54.975 | HepG2 |
| ZC3H8   | ZNF556  | 4326 | 9667  | 20009 | 0.311 | 55.078 | HepG2 |
| GMEB2   | NFYA    | 3015 | 5338  | 17604 | 0.311 | 55.936 | HepG2 |
| ETS1    | ZNF609  | 4746 | 9307  | 25025 | 0.311 | 50.709 | HepG2 |
| ZNF264  | ZNF766  | 4845 | 18666 | 13024 | 0.311 | 58.453 | HepG2 |
| NKX3-1  | ZFP37   | 3504 | 13144 | 9678  | 0.311 | 51.554 | HepG2 |
| HIVEP1  | ZNF333  | 4328 | 17669 | 10988 | 0.311 | 54.299 | HepG2 |
| JRK     | WIZ     | 3933 | 15666 | 10254 | 0.310 | 50.916 | HepG2 |
| DNMT1   | EEA1    | 2816 | 8862  | 9299  | 0.310 | 74.623 | HepG2 |
| ZNF483  | ZNF510  | 4203 | 16926 | 10854 | 0.310 | 61.719 | HepG2 |
| ETS1    | HMG20B  | 3494 | 9307  | 13676 | 0.310 | 57.818 | HepG2 |
| FOXO1   | MEF2A   | 4621 | 25752 | 8647  | 0.310 | 51.969 | HepG2 |
| HMG20B  | MEF2A   | 3365 | 13676 | 8647  | 0.309 | 66.587 | HepG2 |

|        |         |      |       |       |       |        |       |
|--------|---------|------|-------|-------|-------|--------|-------|
| ZNF276 | ZNF548  | 3823 | 10710 | 14256 | 0.309 | 56.714 | HepG2 |
| CAMTA2 | MXD1    | 3782 | 8249  | 18125 | 0.309 | 51.599 | HepG2 |
| ELK1   | ZNF766  | 3480 | 9720  | 13024 | 0.309 | 56.150 | HepG2 |
| GABPA  | SP2     | 2977 | 8201  | 11297 | 0.309 | 56.178 | HepG2 |
| ZHX3   | ZNF792  | 3891 | 6761  | 23423 | 0.309 | 55.775 | HepG2 |
| ZBED4  | ZFP1    | 4700 | 16556 | 13958 | 0.309 | 51.022 | HepG2 |
| E2F1   | E2F2    | 2762 | 11827 | 6781  | 0.308 | 58.387 | HepG2 |
| KLF9   | ZBTB25  | 4064 | 8472  | 20508 | 0.308 | 50.458 | HepG2 |
| KLF9   | ZNF639  | 3287 | 8472  | 13418 | 0.308 | 63.789 | HepG2 |
| KLF6   | ZHX3    | 3447 | 18502 | 6761  | 0.308 | 61.645 | HepG2 |
| ZFP37  | ZNF766  | 3460 | 9678  | 13024 | 0.308 | 53.258 | HepG2 |
| ZBTB21 | ZHX2    | 3121 | 9611  | 10676 | 0.308 | 66.986 | HepG2 |
| DZIP1  | ZNF485  | 2863 | 9278  | 9308  | 0.308 | 56.280 | HepG2 |
| ZNF343 | ZNF782  | 3859 | 13429 | 11685 | 0.308 | 54.669 | HepG2 |
| KLF11  | ZFP1    | 4022 | 12213 | 13958 | 0.308 | 67.250 | HepG2 |
| MEF2A  | MIXL1   | 4803 | 8647  | 28115 | 0.308 | 52.671 | HepG2 |
| ZNF138 | ZSCAN31 | 4263 | 8885  | 21564 | 0.308 | 54.002 | HepG2 |
| ZNF225 | ZNF274  | 4583 | 12359 | 17918 | 0.308 | 52.018 | HepG2 |
| CREB3  | NKX3-1  | 3051 | 7475  | 13144 | 0.308 | 69.781 | HepG2 |
| DNMT1  | IRF5    | 3054 | 8862  | 11111 | 0.308 | 54.501 | HepG2 |
| ZC3H8  | ZNF343  | 3506 | 9667  | 13429 | 0.308 | 61.713 | HepG2 |
| STAT5B | ZBTB44  | 1525 | 4656  | 5276  | 0.308 | 86.870 | HepG2 |
| GMEB2  | TFDP2   | 3372 | 5338  | 22516 | 0.308 | 53.001 | HepG2 |
| TIGD6  | ZNF451  | 4094 | 13801 | 12838 | 0.308 | 50.047 | HepG2 |
| ETS1   | TCF12   | 2009 | 9307  | 4594  | 0.307 | 82.521 | HepG2 |
| NFAT5  | ZNF142  | 3574 | 9150  | 14794 | 0.307 | 53.980 | HepG2 |
| SNAI1  | SNAPC4  | 3484 | 10844 | 11863 | 0.307 | 65.214 | HepG2 |
| MXD3   | NFAT5   | 3909 | 17726 | 9150  | 0.307 | 53.006 | HepG2 |
| ZHX2   | ZNF143  | 3760 | 10676 | 14071 | 0.307 | 61.014 | HepG2 |
| ZNF782 | ZZZ3    | 3062 | 11685 | 8530  | 0.307 | 57.567 | HepG2 |
| MLXIP  | ZSCAN12 | 1858 | 5502  | 6684  | 0.306 | 78.276 | HepG2 |
| ZC3H8  | ZNF543  | 4036 | 9667  | 17952 | 0.306 | 54.350 | HepG2 |
| FOXO1  | TCF12   | 3331 | 25752 | 4594  | 0.306 | 55.971 | HepG2 |
| ZNF276 | ZNF691  | 4390 | 10710 | 19190 | 0.306 | 57.493 | HepG2 |
| MEF2A  | ZFP1    | 3364 | 8647  | 13958 | 0.306 | 58.105 | HepG2 |
| MEF2A  | ZNF511  | 3787 | 8647  | 17697 | 0.306 | 52.665 | HepG2 |
| ZNF276 | ZNF782  | 3421 | 10710 | 11685 | 0.306 | 53.360 | HepG2 |
| ZNF33B | ZNF44   | 3137 | 10715 | 9831  | 0.306 | 54.376 | HepG2 |
| AHR    | MYRF    | 2781 | 12116 | 6833  | 0.306 | 64.454 | HepG2 |
| ZFP1   | ZNF335  | 4455 | 13958 | 15231 | 0.306 | 53.768 | HepG2 |
| ZNF678 | ZNF782  | 2901 | 7739  | 11685 | 0.305 | 67.944 | HepG2 |
| ZNF503 | ZNF766  | 4737 | 18529 | 13024 | 0.305 | 50.293 | HepG2 |
| TEAD2  | ZNF773  | 1430 | 3288  | 6695  | 0.305 | 90.105 | HepG2 |
| THAP9  | ZNF225  | 4922 | 21105 | 12359 | 0.305 | 50.618 | HepG2 |
| ZHX2   | ZNF639  | 3646 | 10676 | 13418 | 0.305 | 57.464 | HepG2 |
| SATB2  | ZNF232  | 3501 | 8020  | 16478 | 0.305 | 67.430 | HepG2 |
| KMT2B  | ZHX3    | 3687 | 21702 | 6761  | 0.304 | 64.118 | HepG2 |
| ELK1   | KMT2B   | 4420 | 9720  | 21702 | 0.304 | 53.035 | HepG2 |
| ZNF556 | ZZZ3    | 3975 | 20009 | 8530  | 0.304 | 56.366 | HepG2 |
| HOXD1  | ZNF142  | 4359 | 13879 | 14794 | 0.304 | 54.568 | HepG2 |
| STAT5B | ZHX3    | 1705 | 4656  | 6761  | 0.304 | 81.246 | HepG2 |
| E2F2   | NFAT5   | 2392 | 6781  | 9150  | 0.304 | 61.648 | HepG2 |

|        |         |       |       |       |       |         |       |
|--------|---------|-------|-------|-------|-------|---------|-------|
| HINFP  | ZZZ3    | 3346  | 14261 | 8530  | 0.303 | 56.472  | HepG2 |
| DLX6   | MEF2A   | 3951  | 19647 | 8647  | 0.303 | 54.927  | HepG2 |
| SIX4   | ZHX3    | 2929  | 13829 | 6761  | 0.303 | 59.652  | HepG2 |
| LBX2   | ZIK1    | 2661  | 7038  | 10981 | 0.303 | 62.497  | HepG2 |
| ZNF274 | ZNF451  | 4589  | 17918 | 12838 | 0.303 | 52.647  | HepG2 |
| HHEX   | SIX4    | 3214  | 8174  | 13829 | 0.302 | 57.908  | HepG2 |
| KLF9   | ZNF205  | 3935  | 8472  | 20027 | 0.302 | 62.391  | HepG2 |
| DNMT1  | TIGD6   | 3340  | 8862  | 13801 | 0.302 | 60.546  | HepG2 |
| ETS1   | SIX4    | 3426  | 9307  | 13829 | 0.302 | 55.519  | HepG2 |
| AKNA   | MTF1    | 1218  | 3772  | 4316  | 0.302 | 96.871  | HepG2 |
| ETS1   | ZKSCAN8 | 4010  | 9307  | 18988 | 0.302 | 51.055  | HepG2 |
| NKX3-1 | ZSCAN12 | 2824  | 13144 | 6684  | 0.301 | 63.685  | HepG2 |
| HOXD1  | ZNF639  | 4108  | 13879 | 13418 | 0.301 | 51.385  | HepG2 |
| PHF20  | ZZZ3    | 3691  | 17625 | 8530  | 0.301 | 53.681  | HepG2 |
| ATF7   | ZNF691  | 4340  | 10839 | 19190 | 0.301 | 51.771  | HepG2 |
| HMG20B | REST    | 4568  | 13676 | 16852 | 0.301 | 51.951  | HepG2 |
| ZNF343 | ZNF691  | 4830  | 13429 | 19190 | 0.301 | 51.979  | HepG2 |
| TIGD6  | ZIK1    | 3703  | 13801 | 10981 | 0.301 | 50.359  | HepG2 |
| LBX2   | ZNF451  | 2859  | 7038  | 12838 | 0.301 | 60.722  | HepG2 |
| TIGD6  | WIZ     | 3577  | 13801 | 10254 | 0.301 | 55.318  | HepG2 |
| ZNF557 | ZNF766  | 3175  | 8561  | 13024 | 0.301 | 59.521  | HepG2 |
| ZHX3   | ZNF331  | 4460  | 6761  | 32566 | 0.301 | 50.934  | HepG2 |
| GMEB2  | PHF20   | 2912  | 5338  | 17625 | 0.300 | 61.491  | HepG2 |
| ATF7   | HINFP   | 3731  | 10839 | 14261 | 0.300 | 55.738  | HepG2 |
| MAFF   | MAFK    | 19903 | 27875 | 27212 | 0.723 | 177.028 | K562  |
| TAL1   | TCF12   | 19712 | 29475 | 28573 | 0.679 | 185.816 | K562  |
| TCF12  | TCF3    | 19889 | 28573 | 33040 | 0.647 | 159.101 | K562  |
| MAFF   | MAFG    | 22716 | 27875 | 45814 | 0.636 | 127.799 | K562  |
| TAL1   | TCF3    | 19737 | 29475 | 33040 | 0.632 | 158.178 | K562  |
| USF1   | USF2    | 12325 | 22381 | 17154 | 0.629 | 182.878 | K562  |
| MAFG   | MAFK    | 20990 | 45814 | 27212 | 0.594 | 124.103 | K562  |
| MITF   | TFE3    | 16056 | 34701 | 22683 | 0.572 | 140.066 | K562  |
| MEIS2  | PBX2    | 24894 | 53049 | 36550 | 0.565 | 97.906  | K562  |
| TCF12  | TEAD4   | 17744 | 28573 | 36089 | 0.553 | 128.129 | K562  |
| NFYA   | NFYB    | 3703  | 4570  | 9997  | 0.548 | 185.207 | K562  |
| TCF3   | TEAD4   | 18911 | 33040 | 36089 | 0.548 | 132.300 | K562  |
| TAL1   | TEAD4   | 17840 | 29475 | 36089 | 0.547 | 141.793 | K562  |
| NR2F1  | NR2F6   | 16517 | 38727 | 23922 | 0.543 | 122.715 | K562  |
| JUN    | JUNB    | 6849  | 11072 | 15517 | 0.523 | 196.062 | K562  |
| CEBPB  | CEBPG   | 25038 | 50240 | 46899 | 0.516 | 64.370  | K562  |
| E2F6   | MAX     | 23180 | 33733 | 59913 | 0.516 | 77.399  | K562  |
| CREB1  | CREM    | 13505 | 17620 | 39050 | 0.515 | 121.823 | K562  |
| MEIS2  | PKNOX1  | 26324 | 53049 | 52253 | 0.500 | 60.246  | K562  |
| FOSL1  | JUN     | 5935  | 12759 | 11072 | 0.499 | 170.572 | K562  |
| FOS    | NFYA    | 2953  | 7848  | 4570  | 0.493 | 173.805 | K562  |
| FOSL1  | JUNB    | 6901  | 12759 | 15517 | 0.490 | 128.638 | K562  |
| JUN    | JUND    | 9432  | 11072 | 35378 | 0.477 | 134.815 | K562  |
| CREM   | MAZ     | 18884 | 39050 | 40397 | 0.475 | 77.403  | K562  |
| NR2F2  | NR2F6   | 10595 | 20900 | 23922 | 0.474 | 129.048 | K562  |
| E4F1   | ELF4    | 12802 | 35525 | 20589 | 0.473 | 102.417 | K562  |
| ATF3   | JUN     | 6775  | 18779 | 11072 | 0.470 | 135.989 | K562  |
| PBX2   | PKNOX1  | 20488 | 36550 | 52253 | 0.469 | 68.802  | K562  |

|        |         |       |       |       |       |         |      |
|--------|---------|-------|-------|-------|-------|---------|------|
| GATA1  | TAL1    | 9746  | 14675 | 29475 | 0.469 | 107.118 | K562 |
| JUNB   | JUND    | 10940 | 15517 | 35378 | 0.467 | 106.468 | K562 |
| MAFG   | NFE2    | 21204 | 45814 | 45103 | 0.466 | 63.492  | K562 |
| MAZ    | VEZF1   | 19982 | 40397 | 46847 | 0.459 | 71.832  | K562 |
| SOX6   | TEAD4   | 16813 | 37291 | 36089 | 0.458 | 81.656  | K562 |
| CTCF   | DEAF1   | 16004 | 59802 | 20812 | 0.454 | 93.310  | K562 |
| DEAF1  | ZNF143  | 11279 | 20812 | 29808 | 0.453 | 121.332 | K562 |
| STAT5A | TEAD4   | 9974  | 13551 | 36089 | 0.451 | 120.491 | K562 |
| GATA1  | TCF12   | 9216  | 14675 | 28573 | 0.450 | 125.301 | K562 |
| SOX6   | TCF3    | 15717 | 37291 | 33040 | 0.448 | 71.717  | K562 |
| GATA1  | GATA2   | 7933  | 14675 | 21627 | 0.445 | 119.388 | K562 |
| KDM5B  | SMAD5   | 9930  | 22367 | 22343 | 0.444 | 96.951  | K562 |
| CREM   | E2F1    | 13163 | 39050 | 22524 | 0.444 | 75.310  | K562 |
| GATA1  | TEAD4   | 10170 | 14675 | 36089 | 0.442 | 99.880  | K562 |
| CTCF   | ZNF143  | 18645 | 59802 | 29808 | 0.442 | 68.537  | K562 |
| STAT5A | TAL1    | 8823  | 13551 | 29475 | 0.441 | 117.873 | K562 |
| STAT5A | TCF12   | 8665  | 13551 | 28573 | 0.440 | 117.188 | K562 |
| STAT5A | TCF3    | 9310  | 13551 | 33040 | 0.440 | 129.113 | K562 |
| ATF7   | CREM    | 18795 | 47196 | 39050 | 0.438 | 50.527  | K562 |
| ATF1   | CREM    | 11199 | 16924 | 39050 | 0.436 | 84.582  | K562 |
| CREB1  | E2F1    | 8651  | 17620 | 22524 | 0.434 | 124.724 | K562 |
| NFYA   | SP2     | 1719  | 4570  | 3435  | 0.434 | 177.218 | K562 |
| GATA1  | STAT5A  | 6106  | 14675 | 13551 | 0.433 | 134.982 | K562 |
| MBD2   | NEUROD1 | 6379  | 15550 | 14154 | 0.430 | 119.029 | K562 |
| GATA1  | TCF3    | 9457  | 14675 | 33040 | 0.429 | 100.593 | K562 |
| NR2F2  | STAT5A  | 7183  | 20900 | 13551 | 0.427 | 127.621 | K562 |
| KLF16  | STAT5A  | 6629  | 17849 | 13551 | 0.426 | 144.240 | K562 |
| CC2D1A | NCOA1   | 10553 | 26436 | 23304 | 0.425 | 102.469 | K562 |
| NR2F1  | NR2F2   | 11946 | 38727 | 20900 | 0.420 | 62.146  | K562 |
| SMAD5  | TBP     | 9300  | 22343 | 22020 | 0.419 | 126.705 | K562 |
| ZNF215 | ZNF311  | 3047  | 7306  | 7247  | 0.419 | 156.430 | K562 |
| ELF1   | ELF4    | 8626  | 20717 | 20589 | 0.418 | 102.836 | K562 |
| KLF16  | TEAD4   | 10589 | 17849 | 36089 | 0.417 | 72.962  | K562 |
| FOXM1  | STAT5A  | 6532  | 18104 | 13551 | 0.417 | 133.079 | K562 |
| NR2F2  | TEAD4   | 11399 | 20900 | 36089 | 0.415 | 75.342  | K562 |
| GMEB1  | MNT     | 13793 | 29364 | 37785 | 0.414 | 68.458  | K562 |
| ATF1   | E2F1    | 8082  | 16924 | 22524 | 0.414 | 100.281 | K562 |
| ATF7   | JUND    | 16804 | 47196 | 35378 | 0.411 | 58.538  | K562 |
| ATF3   | FOSL1   | 6362  | 18779 | 12759 | 0.411 | 112.732 | K562 |
| FOS    | JUN     | 3831  | 7848  | 11072 | 0.411 | 123.408 | K562 |
| FOSL1  | JUND    | 8693  | 12759 | 35378 | 0.409 | 101.227 | K562 |
| CREB1  | ZBTB12  | 5066  | 17620 | 8719  | 0.409 | 142.655 | K562 |
| GATA1  | SOX6    | 9552  | 14675 | 37291 | 0.408 | 98.211  | K562 |
| LEF1   | SOX6    | 11678 | 21938 | 37291 | 0.408 | 90.602  | K562 |
| ATF7   | E2F1    | 13258 | 47196 | 22524 | 0.407 | 76.342  | K562 |
| CREB1  | MBD2    | 6710  | 17620 | 15550 | 0.405 | 103.566 | K562 |
| GATA1  | KLF16   | 6553  | 14675 | 17849 | 0.405 | 100.356 | K562 |
| SOX6   | TCF12   | 13210 | 37291 | 28573 | 0.405 | 55.205  | K562 |
| NR2C1  | NR2C2   | 13492 | 24799 | 45215 | 0.403 | 60.960  | K562 |
| ATF1   | CREB1   | 6949  | 16924 | 17620 | 0.402 | 112.731 | K562 |
| KLF16  | TCF3    | 9761  | 17849 | 33040 | 0.402 | 86.371  | K562 |
| KLF6   | SHOX2   | 2833  | 7751  | 6459  | 0.400 | 163.315 | K562 |

|         |         |       |       |       |       |         |      |
|---------|---------|-------|-------|-------|-------|---------|------|
| KLF16   | TCF12   | 9024  | 17849 | 28573 | 0.400 | 107.057 | K562 |
| ARID2   | DEAF1   | 6296  | 11951 | 20812 | 0.399 | 98.513  | K562 |
| MAZ     | ZNF143  | 13832 | 40397 | 29808 | 0.399 | 66.851  | K562 |
| FOS     | NFYB    | 3509  | 7848  | 9997  | 0.396 | 135.318 | K562 |
| MITF    | USF1    | 11032 | 34701 | 22381 | 0.396 | 78.438  | K562 |
| ZNF148  | ZNF281  | 12143 | 23453 | 40285 | 0.395 | 72.645  | K562 |
| CTCF    | CTCF1   | 11220 | 59802 | 13502 | 0.395 | 81.595  | K562 |
| FOXM1   | GATA1   | 6435  | 18104 | 14675 | 0.395 | 114.763 | K562 |
| MAX     | MYC     | 11729 | 59913 | 14737 | 0.395 | 63.206  | K562 |
| BHLHE40 | MAX     | 16097 | 27807 | 59913 | 0.394 | 52.704  | K562 |
| SNAPC5  | STAT5B  | 246   | 642   | 607   | 0.394 | 166.934 | K562 |
| LEF1    | NCOA1   | 8870  | 21938 | 23304 | 0.392 | 89.200  | K562 |
| FOXM1   | NCOA1   | 8046  | 18104 | 23304 | 0.392 | 99.172  | K562 |
| ATF7    | SKIL    | 13240 | 47196 | 24237 | 0.391 | 63.574  | K562 |
| SOX6    | TAL1    | 12946 | 37291 | 29475 | 0.390 | 58.230  | K562 |
| NR2F2   | TCF3    | 10218 | 20900 | 33040 | 0.389 | 90.250  | K562 |
| ATF3    | CREM    | 10528 | 18779 | 39050 | 0.389 | 76.080  | K562 |
| ATF3    | JUND    | 10009 | 18779 | 35378 | 0.388 | 75.396  | K562 |
| E4F1    | ELF1    | 10508 | 35525 | 20717 | 0.387 | 95.184  | K562 |
| NR2F2   | TCF12   | 9457  | 20900 | 28573 | 0.387 | 85.278  | K562 |
| FOXM1   | TCF12   | 8754  | 18104 | 28573 | 0.385 | 90.810  | K562 |
| FOXM1   | SOX6    | 9999  | 18104 | 37291 | 0.385 | 80.043  | K562 |
| CREM    | NEUROD1 | 9047  | 39050 | 14154 | 0.385 | 78.438  | K562 |
| ATF1    | JUND    | 9416  | 16924 | 35378 | 0.385 | 94.832  | K562 |
| KLF16   | TAL1    | 8810  | 17849 | 29475 | 0.384 | 78.865  | K562 |
| ATF3    | JUNB    | 6542  | 18779 | 15517 | 0.383 | 108.628 | K562 |
| CREM    | MBD2    | 9425  | 39050 | 15550 | 0.382 | 94.694  | K562 |
| FOXM1   | TEAD4   | 9735  | 18104 | 36089 | 0.381 | 77.123  | K562 |
| NEUROD1 | SP1     | 4020  | 14154 | 7876  | 0.381 | 124.082 | K562 |
| E2F6    | MGA     | 12802 | 33733 | 33582 | 0.380 | 55.349  | K562 |
| SOX6    | STAT5A  | 8534  | 37291 | 13551 | 0.380 | 105.386 | K562 |
| GABPA   | MBD2    | 6063  | 16492 | 15550 | 0.379 | 102.887 | K562 |
| KLF16   | SOX6    | 9757  | 17849 | 37291 | 0.378 | 89.646  | K562 |
| CREB1   | GABPA   | 6446  | 17620 | 16492 | 0.378 | 108.884 | K562 |
| FOXM1   | LEF1    | 7529  | 18104 | 21938 | 0.378 | 92.686  | K562 |
| GMEB1   | ZBTB2   | 8754  | 29364 | 18463 | 0.376 | 84.997  | K562 |
| ARNT    | NCOA1   | 7334  | 16351 | 23304 | 0.376 | 92.700  | K562 |
| NR2F2   | TAL1    | 9323  | 20900 | 29475 | 0.376 | 77.028  | K562 |
| FOXM1   | KLF16   | 6747  | 18104 | 17849 | 0.375 | 96.659  | K562 |
| KLF6    | ZNF239  | 2645  | 7751  | 6412  | 0.375 | 131.698 | K562 |
| NR2C1   | NR2F1   | 11612 | 24799 | 38727 | 0.375 | 73.864  | K562 |
| SOX6    | ZEB2    | 12003 | 37291 | 27537 | 0.375 | 59.756  | K562 |
| MAZ     | NEUROD1 | 8955  | 40397 | 14154 | 0.374 | 82.829  | K562 |
| ATF1    | JUN     | 5112  | 16924 | 11072 | 0.373 | 110.674 | K562 |
| MBD2    | SP1     | 4129  | 15550 | 7876  | 0.373 | 117.493 | K562 |
| ETV1    | ETV5    | 7175  | 21785 | 17004 | 0.373 | 94.643  | K562 |
| ARNT    | LEF1    | 7055  | 16351 | 21938 | 0.373 | 102.384 | K562 |
| CREM    | GABPA   | 9444  | 39050 | 16492 | 0.372 | 80.593  | K562 |
| MNT     | MYC     | 8772  | 37785 | 14737 | 0.372 | 86.514  | K562 |
| CREM    | SOX6    | 14149 | 39050 | 37291 | 0.371 | 53.014  | K562 |
| E4F1    | MNT     | 13539 | 35525 | 37785 | 0.370 | 52.516  | K562 |
| NCOA1   | SOX6    | 10892 | 23304 | 37291 | 0.369 | 70.775  | K562 |

|         |         |       |       |       |       |         |      |
|---------|---------|-------|-------|-------|-------|---------|------|
| E2F6    | MYC     | 8237  | 33733 | 14737 | 0.369 | 119.267 | K562 |
| ZBTB17  | ZBTB9   | 5527  | 15161 | 14782 | 0.369 | 116.561 | K562 |
| CREB1   | NEUROD1 | 5830  | 17620 | 14154 | 0.369 | 101.579 | K562 |
| ATF1    | ATF7    | 10432 | 16924 | 47196 | 0.369 | 67.155  | K562 |
| KLF16   | NCOA1   | 7523  | 17849 | 23304 | 0.369 | 88.212  | K562 |
| ATF7    | CREB1   | 10576 | 47196 | 17620 | 0.367 | 78.536  | K562 |
| BHLHE40 | CREM    | 12083 | 27807 | 39050 | 0.367 | 55.873  | K562 |
| ERF     | ZBTB9   | 4436  | 9999  | 14782 | 0.365 | 129.323 | K562 |
| MITF    | USF2    | 8890  | 34701 | 17154 | 0.364 | 83.447  | K562 |
| SHOX2   | ZNF215  | 2503  | 6459  | 7306  | 0.364 | 133.227 | K562 |
| FOXM1   | TCF3    | 8907  | 18104 | 33040 | 0.364 | 61.908  | K562 |
| FOXM1   | TAL1    | 8362  | 18104 | 29475 | 0.362 | 75.712  | K562 |
| BACH1   | NFE2L1  | 2143  | 4739  | 7399  | 0.362 | 157.676 | K562 |
| NCOA1   | STAT5A  | 6423  | 23304 | 13551 | 0.361 | 129.609 | K562 |
| LEF1    | TEAD4   | 10138 | 21938 | 36089 | 0.360 | 64.445  | K562 |
| LEF1    | STAT5A  | 6196  | 21938 | 13551 | 0.359 | 103.767 | K562 |
| KLF16   | NR2F2   | 6939  | 17849 | 20900 | 0.359 | 83.509  | K562 |
| KDM5B   | TBP     | 7941  | 22367 | 22020 | 0.358 | 74.137  | K562 |
| E4F1    | ETV1    | 9945  | 35525 | 21785 | 0.357 | 66.326  | K562 |
| TBX18   | ZNF76   | 2153  | 6175  | 5886  | 0.357 | 130.638 | K562 |
| TSHZ1   | ZNF79   | 1060  | 2648  | 3330  | 0.357 | 120.357 | K562 |
| SHOX2   | ZNF583  | 2792  | 6459  | 9537  | 0.356 | 97.935  | K562 |
| SHOX2   | ZNF239  | 2289  | 6459  | 6412  | 0.356 | 127.512 | K562 |
| CC2D1A  | FOXM1   | 7774  | 26436 | 18104 | 0.355 | 74.358  | K562 |
| HIVEP1  | TSHZ1   | 1220  | 4459  | 2648  | 0.355 | 160.544 | K562 |
| ETV1    | GABPA   | 6726  | 21785 | 16492 | 0.355 | 91.838  | K562 |
| CREB3L1 | MNT     | 10270 | 22214 | 37785 | 0.354 | 69.947  | K562 |
| BCL6    | ZNF257  | 1220  | 2832  | 4190  | 0.354 | 164.736 | K562 |
| MBD2    | TBP     | 6538  | 15550 | 22020 | 0.353 | 89.333  | K562 |
| CREB3L1 | SKIL    | 8185  | 22214 | 24237 | 0.353 | 75.698  | K562 |
| ETV5    | GABPA   | 5894  | 17004 | 16492 | 0.352 | 101.828 | K562 |
| E2F1    | ZBTB12  | 4924  | 22524 | 8719  | 0.351 | 107.956 | K562 |
| HES1    | LEF1    | 5499  | 11186 | 21938 | 0.351 | 106.442 | K562 |
| BHLHE40 | MAZ     | 11762 | 27807 | 40397 | 0.351 | 54.988  | K562 |
| ZBTB9   | ZNF583  | 4161  | 14782 | 9537  | 0.350 | 111.362 | K562 |
| SHOX2   | TSHZ1   | 1449  | 6459  | 2648  | 0.350 | 141.976 | K562 |
| ZNF583  | ZNF76   | 2623  | 9537  | 5886  | 0.350 | 103.885 | K562 |
| KLF6    | ZNF583  | 3010  | 7751  | 9537  | 0.350 | 115.876 | K562 |
| BCL6    | ZNF79   | 1075  | 2832  | 3330  | 0.350 | 149.303 | K562 |
| GABPA   | ZBTB11  | 3879  | 16492 | 7469  | 0.350 | 99.314  | K562 |
| ATF3    | ATF7    | 10397 | 18779 | 47196 | 0.349 | 62.444  | K562 |
| SHOX2   | ZNF79   | 1617  | 6459  | 3330  | 0.349 | 158.817 | K562 |
| KLF6    | TEAD1   | 3498  | 7751  | 12990 | 0.349 | 105.186 | K562 |
| TBX18   | ZNF583  | 2673  | 6175  | 9537  | 0.348 | 113.812 | K562 |
| LEF1    | TCF12   | 8703  | 21938 | 28573 | 0.348 | 61.344  | K562 |
| ELF4    | ETV1    | 7360  | 20589 | 21785 | 0.348 | 78.601  | K562 |
| BCL6    | SHOX2   | 1484  | 2832  | 6459  | 0.347 | 126.217 | K562 |
| E4F1    | MBD2    | 8154  | 35525 | 15550 | 0.347 | 69.303  | K562 |
| CREB1   | MAZ     | 9230  | 17620 | 40397 | 0.346 | 76.084  | K562 |
| NR2C1   | NR2F6   | 8426  | 24799 | 23922 | 0.346 | 76.612  | K562 |
| FOS     | FOSL1   | 3459  | 7848  | 12759 | 0.346 | 108.446 | K562 |
| LEF1    | ZNF281  | 10263 | 21938 | 40285 | 0.345 | 57.542  | K562 |



|        |         |       |       |       |       |         |      |
|--------|---------|-------|-------|-------|-------|---------|------|
| NFYA   | SP1     | 2069  | 4570  | 7876  | 0.345 | 127.247 | K562 |
| FOS    | SP2     | 1790  | 7848  | 3435  | 0.345 | 109.248 | K562 |
| BCL6   | TSHZ1   | 943   | 2832  | 2648  | 0.344 | 125.251 | K562 |
| GABPA  | NEUROD1 | 5261  | 16492 | 14154 | 0.344 | 93.207  | K562 |
| ATF1   | ZBTB12  | 4177  | 16924 | 8719  | 0.344 | 112.147 | K562 |
| CTCF   | ZNF143  | 6898  | 13502 | 29808 | 0.344 | 76.169  | K562 |
| ATF3   | CREB1   | 6250  | 18779 | 17620 | 0.344 | 92.748  | K562 |
| SHOX2  | ZNF311  | 2350  | 6459  | 7247  | 0.343 | 108.824 | K562 |
| HIVEP1 | TBX18   | 1799  | 4459  | 6175  | 0.343 | 134.715 | K562 |
| LEF1   | TCF3    | 9227  | 21938 | 33040 | 0.343 | 59.375  | K562 |
| E2F4   | HMGN3   | 4709  | 10379 | 18201 | 0.343 | 91.565  | K562 |
| NR2F2  | SOX6    | 9555  | 20900 | 37291 | 0.342 | 58.615  | K562 |
| CC2D1A | KLF16   | 7431  | 26436 | 17849 | 0.342 | 109.936 | K562 |
| ATF7   | CREB3L1 | 11057 | 47196 | 22214 | 0.341 | 54.045  | K562 |
| BCL6   | ZNF239  | 1455  | 2832  | 6412  | 0.341 | 131.331 | K562 |
| ATF1   | ATF3    | 6067  | 16924 | 18779 | 0.340 | 93.189  | K562 |
| HIVEP1 | ZNF76   | 1743  | 4459  | 5886  | 0.340 | 125.545 | K562 |
| E4F1   | GABPA   | 8235  | 35525 | 16492 | 0.340 | 69.801  | K562 |
| HIVEP1 | KLF6    | 2000  | 4459  | 7751  | 0.340 | 120.016 | K562 |
| E4F1   | NCOA1   | 9780  | 35525 | 23304 | 0.340 | 59.148  | K562 |
| MBD2   | MNT     | 8236  | 15550 | 37785 | 0.340 | 73.387  | K562 |
| MAZ    | TBP     | 10124 | 40397 | 22020 | 0.339 | 62.035  | K562 |
| NCOA1  | TEAD4   | 9843  | 23304 | 36089 | 0.339 | 59.622  | K562 |
| E4F1   | LEF1    | 9475  | 35525 | 21938 | 0.339 | 61.837  | K562 |
| KLF6   | ZNF79   | 1722  | 7751  | 3330  | 0.339 | 123.784 | K562 |
| GATA1  | NR2F2   | 5934  | 14675 | 20900 | 0.339 | 89.208  | K562 |
| HES1   | SOX6    | 6916  | 11186 | 37291 | 0.339 | 72.575  | K562 |
| SKIL   | SOX6    | 10180 | 24237 | 37291 | 0.339 | 59.376  | K562 |
| ARNT   | FOXM1   | 5825  | 16351 | 18104 | 0.339 | 115.278 | K562 |
| ATF7   | NEUROD1 | 8749  | 47196 | 14154 | 0.339 | 64.832  | K562 |
| E4F1   | GMEB1   | 10932 | 35525 | 29364 | 0.338 | 53.625  | K562 |
| TEAD1  | ZNF239  | 3083  | 12990 | 6412  | 0.338 | 100.726 | K562 |
| NFE2   | NFE2L1  | 6166  | 45103 | 7399  | 0.338 | 87.119  | K562 |
| MAZ    | MYC     | 8230  | 40397 | 14737 | 0.337 | 57.173  | K562 |
| GABPA  | MAZ     | 8706  | 16492 | 40397 | 0.337 | 70.986  | K562 |
| E2F4   | E2F6    | 6309  | 10379 | 33733 | 0.337 | 98.126  | K562 |
| ARID2  | CC2D1A  | 5986  | 11951 | 26436 | 0.337 | 68.273  | K562 |
| E2F3   | ERF     | 3123  | 8607  | 9999  | 0.337 | 106.431 | K562 |
| CREM   | MYC     | 8073  | 39050 | 14737 | 0.337 | 69.885  | K562 |
| CREB1  | MNT     | 8667  | 17620 | 37785 | 0.336 | 63.280  | K562 |
| ATF3   | FOS     | 4074  | 18779 | 7848  | 0.336 | 104.143 | K562 |
| CREB1  | GMEB1   | 7628  | 17620 | 29364 | 0.335 | 73.881  | K562 |
| ESRRA  | SKIL    | 9572  | 33637 | 24237 | 0.335 | 54.823  | K562 |
| JUND   | TEAD4   | 11957 | 35378 | 36089 | 0.335 | 51.358  | K562 |
| FOXM1  | NR2F2   | 6508  | 18104 | 20900 | 0.335 | 78.333  | K562 |
| GMEB1  | MBD2    | 7145  | 29364 | 15550 | 0.334 | 85.081  | K562 |
| HIVEP1 | ZNF79   | 1288  | 4459  | 3330  | 0.334 | 117.355 | K562 |
| SHOX2  | TBX18   | 2108  | 6459  | 6175  | 0.334 | 111.300 | K562 |
| CREB1  | E2F4    | 4512  | 17620 | 10379 | 0.334 | 112.541 | K562 |
| KLF6   | TSHZ1   | 1510  | 7751  | 2648  | 0.333 | 116.006 | K562 |
| E4F1   | NEUROD1 | 7471  | 35525 | 14154 | 0.333 | 73.127  | K562 |
| GATA2  | TEAD4   | 9304  | 21627 | 36089 | 0.333 | 67.305  | K562 |

|         |         |       |       |       |       |         |      |
|---------|---------|-------|-------|-------|-------|---------|------|
| HIVEP1  | ZNF583  | 2171  | 4459  | 9537  | 0.333 | 114.945 | K562 |
| MAZ     | MBD2    | 8344  | 40397 | 15550 | 0.333 | 65.281  | K562 |
| CREM    | KLF16   | 8785  | 39050 | 17849 | 0.333 | 53.225  | K562 |
| ATF7    | MBD2    | 8998  | 47196 | 15550 | 0.332 | 77.488  | K562 |
| KLF6    | TBX18   | 2297  | 7751  | 6175  | 0.332 | 110.842 | K562 |
| CREB5   | PATZ1   | 729   | 1990  | 2428  | 0.332 | 130.988 | K562 |
| E4F1    | FO XK2  | 9516  | 35525 | 23181 | 0.332 | 53.895  | K562 |
| CC2D1A  | CHAMP1  | 6534  | 26436 | 14730 | 0.331 | 65.850  | K562 |
| FOXM1   | HES1    | 4710  | 18104 | 11186 | 0.331 | 104.445 | K562 |
| MNT     | NCOA1   | 9820  | 37785 | 23304 | 0.331 | 63.845  | K562 |
| LEF1    | NR2F2   | 7071  | 21938 | 20900 | 0.330 | 88.788  | K562 |
| E2F4    | TBP     | 4988  | 10379 | 22020 | 0.330 | 111.848 | K562 |
| HIVEP1  | SHOX2   | 1770  | 4459  | 6459  | 0.330 | 113.747 | K562 |
| ELF1    | GABPA   | 6096  | 20717 | 16492 | 0.330 | 96.149  | K562 |
| ZNF175  | ZNF589  | 6573  | 18986 | 20981 | 0.329 | 63.197  | K562 |
| GATA2   | TCF12   | 8178  | 21627 | 28573 | 0.329 | 74.736  | K562 |
| ETS1    | GABPA   | 4493  | 11321 | 16492 | 0.329 | 89.265  | K562 |
| KLF6    | ZNF215  | 2472  | 7751  | 7306  | 0.328 | 113.483 | K562 |
| NCOA1   | NR2F2   | 7248  | 23304 | 20900 | 0.328 | 70.108  | K562 |
| TEAD4   | ZEB2    | 10337 | 36089 | 27537 | 0.328 | 50.758  | K562 |
| GATA2   | SOX6    | 9303  | 21627 | 37291 | 0.328 | 52.487  | K562 |
| BCL6    | ZNF354B | 914   | 2832  | 2758  | 0.327 | 151.426 | K562 |
| ZNF239  | ZNF79   | 1510  | 6412  | 3330  | 0.327 | 111.166 | K562 |
| MXI1    | MYC     | 3777  | 9080  | 14737 | 0.327 | 104.868 | K562 |
| SP1     | SP2     | 1698  | 7876  | 3435  | 0.326 | 123.072 | K562 |
| BCL6    | KLF6    | 1529  | 2832  | 7751  | 0.326 | 121.882 | K562 |
| FOS     | JUNB    | 3598  | 7848  | 15517 | 0.326 | 132.523 | K562 |
| BHLHE40 | MYC     | 6592  | 27807 | 14737 | 0.326 | 66.968  | K562 |
| SHOX2   | ZNF257  | 1694  | 6459  | 4190  | 0.326 | 119.828 | K562 |
| BHLHE40 | USF1    | 8122  | 27807 | 22381 | 0.326 | 67.509  | K562 |
| LEF1    | ZNF318  | 4791  | 21938 | 9879  | 0.325 | 91.662  | K562 |
| ELF1    | ETV1    | 6911  | 20717 | 21785 | 0.325 | 70.900  | K562 |
| ARNT    | NFATC3  | 4811  | 16351 | 13378 | 0.325 | 89.539  | K562 |
| HMG N3  | MAZ     | 8819  | 18201 | 40397 | 0.325 | 68.094  | K562 |
| TSHZ1   | ZNF257  | 1081  | 2648  | 4190  | 0.325 | 138.452 | K562 |
| ASH1L   | NFYA    | 1958  | 7970  | 4570  | 0.324 | 142.323 | K562 |
| LEF1    | ZEB2    | 7970  | 21938 | 27537 | 0.324 | 54.382  | K562 |
| BCL6    | ZNF507  | 1275  | 2832  | 5465  | 0.324 | 109.294 | K562 |
| GATA1   | HES1    | 4147  | 14675 | 11186 | 0.324 | 90.281  | K562 |
| NEUROD1 | SOX6    | 7434  | 14154 | 37291 | 0.324 | 75.169  | K562 |
| GATA1   | LEF1    | 5803  | 14675 | 21938 | 0.323 | 79.355  | K562 |
| E2F4    | MAZ     | 6618  | 10379 | 40397 | 0.323 | 61.865  | K562 |
| GATA2   | STAT5A  | 5530  | 21627 | 13551 | 0.323 | 91.618  | K562 |
| KLF16   | MAZ     | 8674  | 17849 | 40397 | 0.323 | 50.569  | K562 |
| MNT     | NEUROD1 | 7443  | 37785 | 14154 | 0.322 | 71.267  | K562 |
| NFYB    | SP2     | 1886  | 9997  | 3435  | 0.322 | 131.906 | K562 |
| ERF     | TFCP2   | 2995  | 9999  | 8671  | 0.322 | 103.542 | K562 |
| TBX18   | ZBTB9   | 3064  | 6175  | 14782 | 0.321 | 101.113 | K562 |
| KLF6    | ZNF257  | 1827  | 7751  | 4190  | 0.321 | 108.955 | K562 |
| ZNF239  | ZNF583  | 2507  | 6412  | 9537  | 0.321 | 99.444  | K562 |
| HES1    | STAT5A  | 3947  | 11186 | 13551 | 0.321 | 79.135  | K562 |
| NCOA1   | TCF12   | 8264  | 23304 | 28573 | 0.320 | 54.147  | K562 |

|        |         |      |       |       |       |         |      |
|--------|---------|------|-------|-------|-------|---------|------|
| NCOA1  | TCF3    | 8877 | 23304 | 33040 | 0.320 | 62.267  | K562 |
| MAFG   | NFE2L1  | 5888 | 45814 | 7399  | 0.320 | 74.105  | K562 |
| E2F5   | ZNF639  | 7331 | 19514 | 26973 | 0.320 | 56.605  | K562 |
| E2F4   | MYC     | 3948 | 10379 | 14737 | 0.319 | 97.039  | K562 |
| CC2D1A | DEAF1   | 7487 | 26436 | 20812 | 0.319 | 63.475  | K562 |
| E2F5   | ZNF766  | 7244 | 19514 | 26421 | 0.319 | 71.831  | K562 |
| SHOX2  | TEAD1   | 2922 | 6459  | 12990 | 0.319 | 104.498 | K562 |
| TEAD1  | ZNF583  | 3550 | 12990 | 9537  | 0.319 | 77.599  | K562 |
| CREB1  | TBP     | 6263 | 17620 | 22020 | 0.318 | 77.886  | K562 |
| HIVEP1 | ZNF239  | 1700 | 4459  | 6412  | 0.318 | 98.231  | K562 |
| ARNT   | CC2D1A  | 6605 | 16351 | 26436 | 0.318 | 95.934  | K562 |
| E2F8   | E4F1    | 6763 | 12762 | 35525 | 0.318 | 72.917  | K562 |
| ZNF215 | ZNF583  | 2651 | 7306  | 9537  | 0.318 | 119.422 | K562 |
| ZNF395 | ZNF639  | 8293 | 25294 | 26973 | 0.317 | 64.836  | K562 |
| ZBTB9  | ZNF76   | 2960 | 14782 | 5886  | 0.317 | 89.240  | K562 |
| CREB5  | RBPJ    | 661  | 1990  | 2181  | 0.317 | 144.570 | K562 |
| CHAMP1 | FOXM1   | 5179 | 14730 | 18104 | 0.317 | 81.526  | K562 |
| CREM   | ZBTB12  | 5849 | 39050 | 8719  | 0.317 | 75.073  | K562 |
| ZNF257 | ZNF79   | 1184 | 4190  | 3330  | 0.317 | 122.505 | K562 |
| TBX18  | ZNF239  | 1994 | 6175  | 6412  | 0.317 | 105.014 | K562 |
| BCL6   | ZNF215  | 1441 | 2832  | 7306  | 0.317 | 109.700 | K562 |
| MAFF   | NFE2L1  | 4547 | 27875 | 7399  | 0.317 | 82.732  | K562 |
| BCL6   | HIVEP1  | 1125 | 2832  | 4459  | 0.317 | 105.840 | K562 |
| GATA2  | TAL1    | 7990 | 21627 | 29475 | 0.316 | 57.446  | K562 |
| ZNF250 | ZNF397  | 851  | 2468  | 2931  | 0.316 | 118.846 | K562 |
| E2F3   | ZBTB9   | 3568 | 8607  | 14782 | 0.316 | 77.943  | K562 |
| ATF1   | SOX6    | 7942 | 16924 | 37291 | 0.316 | 53.347  | K562 |
| TCF3   | ZEB2    | 9522 | 33040 | 27537 | 0.316 | 56.966  | K562 |
| HES1   | NCOA1   | 5092 | 11186 | 23304 | 0.315 | 85.206  | K562 |
| SHOX2  | ZNF76   | 1942 | 6459  | 5886  | 0.315 | 96.779  | K562 |
| KDM5B  | THAP12  | 4742 | 22367 | 10136 | 0.315 | 99.343  | K562 |
| ZNF175 | ZNF584  | 5303 | 18986 | 14944 | 0.315 | 76.748  | K562 |
| MYC    | TBP     | 5666 | 14737 | 22020 | 0.315 | 73.713  | K562 |
| BCL6   | TBX18   | 1315 | 2832  | 6175  | 0.314 | 127.612 | K562 |
| ERF    | ZNF583  | 3070 | 9999  | 9537  | 0.314 | 108.341 | K562 |
| CREB1  | E4F1    | 7862 | 17620 | 35525 | 0.314 | 62.357  | K562 |
| TSHZ1  | ZNF239  | 1294 | 2648  | 6412  | 0.314 | 102.233 | K562 |
| E2F3   | NR4A1   | 2016 | 8607  | 4794  | 0.314 | 115.584 | K562 |
| MYC    | NEUROD1 | 4527 | 14737 | 14154 | 0.313 | 72.998  | K562 |
| CREB1  | MYC     | 5049 | 17620 | 14737 | 0.313 | 79.819  | K562 |
| ZNF239 | ZNF257  | 1624 | 6412  | 4190  | 0.313 | 130.013 | K562 |
| TCF12  | ZEB2    | 8783 | 28573 | 27537 | 0.313 | 54.708  | K562 |
| GMEB1  | NEUROD1 | 6379 | 29364 | 14154 | 0.313 | 85.516  | K562 |
| ATF7   | JUN     | 7146 | 47196 | 11072 | 0.313 | 53.433  | K562 |
| E2F4   | MBD2    | 3967 | 10379 | 15550 | 0.312 | 96.055  | K562 |
| E2F5   | ZNF644  | 4963 | 19514 | 12949 | 0.312 | 82.940  | K562 |
| KLF16  | LEF1    | 6176 | 17849 | 21938 | 0.312 | 81.278  | K562 |
| GATA2  | TCF3    | 8336 | 21627 | 33040 | 0.312 | 57.195  | K562 |
| E2F3   | ZNF76   | 2218 | 8607  | 5886  | 0.312 | 102.552 | K562 |
| FOXM1  | GATA2   | 6166 | 18104 | 21627 | 0.312 | 87.902  | K562 |
| E2F8   | ELF4    | 5051 | 12762 | 20589 | 0.312 | 84.323  | K562 |
| ERF    | NR4A1   | 2155 | 9999  | 4794  | 0.311 | 116.094 | K562 |

|         |         |      |       |       |       |         |      |
|---------|---------|------|-------|-------|-------|---------|------|
| NCOA1   | NEUROD1 | 5651 | 23304 | 14154 | 0.311 | 81.824  | K562 |
| MBD2    | SMAD5   | 5793 | 15550 | 22343 | 0.311 | 76.276  | K562 |
| ARNT    | SOX6    | 7670 | 16351 | 37291 | 0.311 | 61.887  | K562 |
| HES1    | TEAD4   | 6238 | 11186 | 36089 | 0.310 | 68.411  | K562 |
| FOS     | NEUROD1 | 3268 | 7848  | 14154 | 0.310 | 84.596  | K562 |
| ETS1    | MYC     | 4005 | 11321 | 14737 | 0.310 | 88.376  | K562 |
| MYNN    | NEUROD1 | 4581 | 15431 | 14154 | 0.310 | 77.182  | K562 |
| KLF6    | ZNF311  | 2323 | 7751  | 7247  | 0.310 | 103.736 | K562 |
| CREB3L1 | GMEB1   | 7914 | 22214 | 29364 | 0.310 | 59.176  | K562 |
| MBD2    | SMAD1   | 3627 | 15550 | 8819  | 0.310 | 86.177  | K562 |
| TBX18   | TSHZ1   | 1252 | 6175  | 2648  | 0.310 | 103.812 | K562 |
| CREB1   | HMGN3   | 5544 | 17620 | 18201 | 0.310 | 74.229  | K562 |
| E4F1    | FOXM1   | 7851 | 35525 | 18104 | 0.310 | 57.125  | K562 |
| FOXK2   | NCOA1   | 7183 | 23181 | 23304 | 0.309 | 68.382  | K562 |
| GATA1   | NCOA1   | 5711 | 14675 | 23304 | 0.309 | 62.934  | K562 |
| ZBTB17  | ZNF583  | 3713 | 15161 | 9537  | 0.309 | 80.625  | K562 |
| TEAD1   | TEAD4   | 6685 | 12990 | 36089 | 0.309 | 57.202  | K562 |
| FOS     | SP1     | 2426 | 7848  | 7876  | 0.309 | 100.453 | K562 |
| DDIT3   | ZSCAN32 | 1328 | 4129  | 4494  | 0.308 | 128.417 | K562 |
| E4F1    | ETV5    | 7568 | 35525 | 17004 | 0.308 | 73.510  | K562 |
| CREM    | JUN     | 6400 | 39050 | 11072 | 0.308 | 68.077  | K562 |
| KLF6    | ZNF76   | 2075 | 7751  | 5886  | 0.307 | 109.510 | K562 |
| SMAD5   | THAP12  | 4622 | 22343 | 10136 | 0.307 | 87.006  | K562 |
| E2F3    | ZNF583  | 2782 | 8607  | 9537  | 0.307 | 100.648 | K562 |
| TSHZ1   | ZNF76   | 1212 | 2648  | 5886  | 0.307 | 111.038 | K562 |
| ERF     | ZBTB17  | 3779 | 9999  | 15161 | 0.307 | 84.672  | K562 |
| DLX4    | KLF10   | 231  | 529   | 1071  | 0.307 | 153.313 | K562 |
| TSHZ1   | ZNF583  | 1542 | 2648  | 9537  | 0.307 | 105.107 | K562 |
| TBX18   | ZNF79   | 1391 | 6175  | 3330  | 0.307 | 123.521 | K562 |
| ELF4    | MBD2    | 5485 | 20589 | 15550 | 0.307 | 70.393  | K562 |
| TSHZ1   | ZNF215  | 1348 | 2648  | 7306  | 0.306 | 107.151 | K562 |
| TSHZ1   | ZNF354B | 828  | 2648  | 2758  | 0.306 | 119.007 | K562 |
| HIVEP1  | ZNF165  | 1205 | 4459  | 3470  | 0.306 | 110.400 | K562 |
| E2F5    | ZNF197  | 4428 | 19514 | 10708 | 0.306 | 83.040  | K562 |
| STAT5A  | ZNF281  | 7157 | 13551 | 40285 | 0.306 | 64.785  | K562 |
| LEF1    | TAL1    | 7782 | 21938 | 29475 | 0.306 | 53.615  | K562 |
| FOXK2   | LEF1    | 6900 | 23181 | 21938 | 0.306 | 60.070  | K562 |
| ZNF197  | ZNF644  | 3601 | 10708 | 12949 | 0.306 | 93.804  | K562 |
| E2F4    | ETS1    | 3314 | 10379 | 11321 | 0.306 | 106.401 | K562 |
| ETS1    | MBD2    | 4056 | 11321 | 15550 | 0.306 | 78.038  | K562 |
| ERF     | ZNF76   | 2345 | 9999  | 5886  | 0.306 | 98.253  | K562 |
| ERF     | RREB1   | 2827 | 9999  | 8561  | 0.306 | 77.783  | K562 |
| CREM    | MYNN    | 7500 | 39050 | 15431 | 0.306 | 58.519  | K562 |
| NCOA1   | ZEB2    | 7733 | 23304 | 27537 | 0.305 | 55.162  | K562 |
| HMGN3   | MBD2    | 5134 | 18201 | 15550 | 0.305 | 90.306  | K562 |
| PATZ1   | RBPJ    | 702  | 2428  | 2181  | 0.305 | 113.269 | K562 |
| CREM    | E2F4    | 6140 | 39050 | 10379 | 0.305 | 61.104  | K562 |
| ELF4    | GABPA   | 5616 | 20589 | 16492 | 0.305 | 72.206  | K562 |
| NR2C1   | NR2F2   | 6938 | 24799 | 20900 | 0.305 | 52.819  | K562 |
| JUND    | LEF1    | 8490 | 35378 | 21938 | 0.305 | 51.087  | K562 |
| BHLHE40 | NEUROD1 | 6045 | 27807 | 14154 | 0.305 | 57.738  | K562 |
| MNT     | MXI1    | 5633 | 37785 | 9080  | 0.304 | 73.413  | K562 |

|         |         |       |       |       |       |         |       |
|---------|---------|-------|-------|-------|-------|---------|-------|
| FOXO4   | ZNF57   | 734   | 2724  | 2140  | 0.304 | 119.593 | K562  |
| FOS     | MBD2    | 3354  | 7848  | 15550 | 0.304 | 91.629  | K562  |
| NFXL1   | TSHZ1   | 864   | 3067  | 2648  | 0.303 | 134.769 | K562  |
| TEAD1   | ZBTB9   | 4200  | 12990 | 14782 | 0.303 | 98.440  | K562  |
| GATA2   | KLF16   | 5948  | 21627 | 17849 | 0.303 | 72.606  | K562  |
| NEUROD1 | VEZF1   | 7791  | 14154 | 46847 | 0.303 | 50.086  | K562  |
| ATF3    | MAZ     | 8332  | 18779 | 40397 | 0.303 | 55.626  | K562  |
| ETS1    | HMG3    | 4342  | 11321 | 18201 | 0.302 | 83.474  | K562  |
| RREB1   | ZNF76   | 2146  | 8561  | 5886  | 0.302 | 112.446 | K562  |
| BACH1   | MAFK    | 3432  | 4739  | 27212 | 0.302 | 83.207  | K562  |
| ZNF239  | ZNF507  | 1788  | 6412  | 5465  | 0.302 | 121.439 | K562  |
| NEUROD1 | TBP     | 5332  | 14154 | 22020 | 0.302 | 66.951  | K562  |
| BCL6    | ZNF583  | 1569  | 2832  | 9537  | 0.302 | 89.167  | K562  |
| ZNF215  | ZNF239  | 2066  | 7306  | 6412  | 0.302 | 97.543  | K562  |
| RREB1   | ZBTB9   | 3395  | 8561  | 14782 | 0.302 | 78.942  | K562  |
| HIVEP1  | NR4A1   | 1395  | 4459  | 4794  | 0.302 | 122.645 | K562  |
| ATF3    | NEUROD1 | 4913  | 18779 | 14154 | 0.301 | 88.160  | K562  |
| ATF1    | JUNB    | 4883  | 16924 | 15517 | 0.301 | 70.137  | K562  |
| HIVEP1  | ZNF257  | 1302  | 4459  | 4190  | 0.301 | 107.485 | K562  |
| GABPA   | MNT     | 7517  | 16492 | 37785 | 0.301 | 52.879  | K562  |
| RREB1   | ZNF583  | 2720  | 8561  | 9537  | 0.301 | 98.597  | K562  |
| HES1    | KLF16   | 4253  | 11186 | 17849 | 0.301 | 98.749  | K562  |
| NR4A1   | RREB1   | 1928  | 4794  | 8561  | 0.301 | 107.550 | K562  |
| ARNT    | E4F1    | 7249  | 16351 | 35525 | 0.301 | 68.277  | K562  |
| SKIL    | ZNF282  | 5389  | 24237 | 13248 | 0.301 | 79.033  | K562  |
| HOMEZ   | ZNF133  | 585   | 2447  | 1548  | 0.301 | 131.007 | K562  |
| TEAD1   | ZNF507  | 2531  | 12990 | 5465  | 0.300 | 97.573  | K562  |
| NR4A1   | ZNF76   | 1595  | 4794  | 5886  | 0.300 | 113.060 | K562  |
| ARID3A  | STAT5A  | 3728  | 11377 | 13551 | 0.300 | 90.409  | K562  |
| MAX     | MYC     | 18866 | 38331 | 33008 | 0.530 | 116.512 | MCF-7 |
| GATA3   | NR2F2   | 20118 | 47474 | 34427 | 0.498 | 98.989  | MCF-7 |
| FOS     | FOSL2   | 17907 | 63152 | 21640 | 0.484 | 90.741  | MCF-7 |
| FOSL2   | JUND    | 8584  | 21640 | 14651 | 0.482 | 140.291 | MCF-7 |
| ELF1    | GABPA   | 8325  | 21038 | 14816 | 0.472 | 131.683 | MCF-7 |
| MAX     | MNT     | 17014 | 38331 | 35594 | 0.461 | 105.996 | MCF-7 |
| FOXM1   | TCF12   | 4366  | 9332  | 11601 | 0.420 | 154.692 | MCF-7 |
| MNT     | MYC     | 14381 | 35594 | 33008 | 0.420 | 101.032 | MCF-7 |
| ELK1    | GABPA   | 4013  | 8180  | 14816 | 0.365 | 130.458 | MCF-7 |
| MBD2    | TCF12   | 4228  | 11612 | 11601 | 0.364 | 116.726 | MCF-7 |
| ZNF592  | ZNF687  | 4711  | 8037  | 21097 | 0.362 | 110.615 | MCF-7 |
| NR2F2   | TCF12   | 7228  | 34427 | 11601 | 0.362 | 90.671  | MCF-7 |
| GATA3   | TCF12   | 8474  | 47474 | 11601 | 0.361 | 76.286  | MCF-7 |
| MAZ     | MNT     | 9655  | 20397 | 35594 | 0.358 | 82.951  | MCF-7 |
| TCF12   | ZNF217  | 4425  | 11601 | 13180 | 0.358 | 122.703 | MCF-7 |
| FOXM1   | MBD2    | 3655  | 9332  | 11612 | 0.351 | 129.410 | MCF-7 |
| OVOL1   | SPDEF   | 7980  | 22812 | 22779 | 0.350 | 99.253  | MCF-7 |
| NCOA3   | NEUROD1 | 2773  | 8114  | 7850  | 0.347 | 120.982 | MCF-7 |
| ELF1    | MAX     | 9841  | 21038 | 38331 | 0.347 | 74.541  | MCF-7 |
| FOXM1   | JUND    | 4025  | 9332  | 14651 | 0.344 | 110.771 | MCF-7 |
| CEBPB   | CEBPG   | 8259  | 37725 | 15351 | 0.343 | 96.323  | MCF-7 |
| MAX     | ZNF687  | 9726  | 38331 | 21097 | 0.342 | 84.113  | MCF-7 |
| FOXM1   | NR2F2   | 6115  | 9332  | 34427 | 0.341 | 94.842  | MCF-7 |

|         |         |      |       |       |       |         |       |
|---------|---------|------|-------|-------|-------|---------|-------|
| ELF1    | ELK1    | 4379 | 21038 | 8180  | 0.334 | 104.482 | MCF-7 |
| JUND    | TCF12   | 4336 | 14651 | 11601 | 0.333 | 109.296 | MCF-7 |
| ELF1    | MYC     | 8743 | 21038 | 33008 | 0.332 | 69.580  | MCF-7 |
| GATAD2B | NEUROD1 | 3015 | 10644 | 7850  | 0.330 | 96.385  | MCF-7 |
| MAZ     | MYC     | 8551 | 20397 | 33008 | 0.330 | 60.072  | MCF-7 |
| FOXM1   | NCOA3   | 2859 | 9332  | 8114  | 0.329 | 148.073 | MCF-7 |
| NR2F2   | SPDEF   | 9156 | 34427 | 22779 | 0.327 | 64.925  | MCF-7 |
| FOXM1   | ZNF217  | 3537 | 9332  | 13180 | 0.319 | 118.709 | MCF-7 |
| JUND    | NR2F2   | 7126 | 14651 | 34427 | 0.317 | 86.661  | MCF-7 |
| GATA3   | ZNF217  | 7885 | 47474 | 13180 | 0.315 | 66.847  | MCF-7 |
| FOXM1   | GATA3   | 6629 | 9332  | 47474 | 0.315 | 81.074  | MCF-7 |
| NCOA3   | TCF12   | 3027 | 8114  | 11601 | 0.312 | 115.095 | MCF-7 |
| FOSL2   | JUN     | 3686 | 21640 | 6469  | 0.312 | 95.804  | MCF-7 |
| MAX     | MAZ     | 8644 | 38331 | 20397 | 0.309 | 59.142  | MCF-7 |
| FOXM1   | SPDEF   | 4475 | 9332  | 22779 | 0.307 | 93.257  | MCF-7 |
| GATA3   | JUND    | 8056 | 47474 | 14651 | 0.305 | 51.605  | MCF-7 |
| NR2F2   | ZNF217  | 6497 | 34427 | 13180 | 0.305 | 75.785  | MCF-7 |
| SPDEF   | TCF12   | 4947 | 22779 | 11601 | 0.304 | 100.617 | MCF-7 |
| JUN     | JUND    | 2949 | 6469  | 14651 | 0.303 | 93.697  | MCF-7 |
| ELF1    | MNT     | 8233 | 21038 | 35594 | 0.301 | 77.550  | MCF-7 |
